# Supplementary material
Source: PubMed Central journal article supplement (PMC3714097)
Supplement: NIHMS62664-supplement-4si20070716_08.pdf [file NIHMS62664-supplement-4si20070716_08.pdf]

# Azabeyerane and Azatrachylobane: Potent Mechanism-based Inhibitors of Recombinant Kaurene Synthase from *Arabidopsis thaliana*

Arnab Roy, Frank G. Roberts, P. Ross Wilderman, Ke Zhou, Reuben J. Peters, and Robert M. Coates\*  
Department of Chemistry, University of Illinois, 600 South Mathews Ave., Urbana, IL 61801 and  
Department of Biochemistry, Biophysics, & Molecular Biology, Iowa State University, Ames, IA 50011.

## SUPPORTING INFORMATION

### Table of Contents

|                                                                                                                  |     |
|------------------------------------------------------------------------------------------------------------------|-----|
| General Aspects and Instrumentation.....                                                                         | S1  |
| Isolation and Characterization of Isosteviol ( <b>15a</b> ).....                                                 | S2  |
| Preparation and Characterization of Isosteviol Methyl Ester ( <b>15b</b> ) and Beyeran-16-one ( <b>16</b> )..... | S3  |
| Procedures and Characterization Data for <b>17 - 20b</b> , <b>22</b> , and <b>23</b> .....                       | S4  |
| Procedures and Characterization Data for <b>25a</b> , <b>25b</b> , and <b>11</b> .....                           | S9  |
| References.....                                                                                                  | S11 |
| Reproductions of NMR and Other Spectra.....                                                                      | S13 |
| ORTEP Figures and Tables of Crystallography Data from 3 Single Crystal Diffraction Analyses:                     |     |
| Unsaturated Nitrile <b>18a</b> .....                                                                             | S50 |
| Methyl <i>ent</i> -Trachylon-19-oate ( <b>3</b> with axial CO <sub>2</sub> Me group at C4) .....                 | S62 |
| 16-Aza- <i>ent</i> -trachylobane Picrate Salt ( <b>2</b> ).....                                                  | S75 |

### General Aspects and Instrumentation

<sup>1</sup>H and <sup>13</sup>C spectra were recorded in CDCl<sub>3</sub> (Chemical shift references <sup>1</sup>H, 7.26; <sup>13</sup>C, 77.0) with Varian U400 or U500 spectrometers at the University of Illinois. Chemical shifts are in ppm and coupling constants are in Hertz. The abbreviation ‘app’ is used to describe the apparent multiplicity of the peak and may or may not be a valid first order analysis. Mass spectra were recorded on 70V-SE instruments. Infrared (IR) spectra were obtained using a Spectrum BX spectrophotometer referenced to

polystyrene standard. Data are presented as the frequency of absorption ( $\text{cm}^{-1}$ ). Optical rotations were measured with a JASCO DIP-370 digital polarimeter at 25 °C.

All reactions were performed in flame-dried glassware under nitrogen. THF and  $\text{Et}_2\text{O}$  were dried and distilled from Na/benzophenone. Benzene and  $\text{CH}_2\text{Cl}_2$  were dried and distilled from  $\text{CaH}_2$ . Hexane and ethyl acetate were freshly distilled from  $\text{CaH}_2$ . TLC analyses were performed on a silica gel 60 F254 precoated-plates (250  $\mu\text{m}$  layer). All retention factors ( $R_f$ ) are on silica gel TLC plates unless otherwise noted. TLC visualizations were performed with 5% phosphomolybdic acid (0.2 M in 2.5% concd  $\text{H}_2\text{SO}_4/\text{EtOH}$  (v/v)),  $\text{I}_2$  vapor, or UV light. Commercial reagents were used without further purification unless specifically noted. Column chromatography was performed according to the procedure of Still et al<sup>1</sup> using 100-700 times excess 32-64  $\mu\text{m}$  grade silica gel. Products separated by chromatography are specified in elution order. In some cases the yields of products containing residual amounts of solvent were corrected for the solvent peak integration in  $^1\text{H}$  NMR spectra and specified individually in the data sections. The purity of reaction products was estimated to be  $\geq 90\text{-}95\%$  by TLC and NMR analyses unless specified otherwise.

Gas chromatography (GC) was conducted using a Shimadzu Model 14A-GC on a Rtx-5 30-m fused silica capillary column (split ratio~ 100:1). The following program was used: initial temp of 60 °C for 10 min, ramp 8 °C/min to 270 °C, and hold for 10 min. The standard operating conditions were 300 °C injector temp and 310 °C detector temp. A Hewlett-Packard 3395 integrator was used to integrate the FID detector signal.

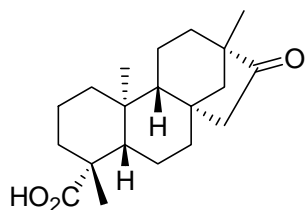

**15a**

**ent-16-Oxobeyeran-19-oic Acid (15a, Isosteviol) Method A. From *Stevia rebaudiana*.** Isosteviol was obtained from dried leaves and stems of *Stevia rebaudiana* Bertoni<sup>2</sup> according to a literature procedure<sup>3</sup>

used previously at the University of Illinois<sup>4</sup> with some modification. Dried and ground leaves and stems (500 g) were stirred and heated at 60 °C with five 150-mL portions of 95% ethanol. The extracts were decanted, combined, and concentrated by rotary evaporation. The residual syrupy liquid was leached with ether (2 x 50 mL) and dissolved in 40 mL of 48% HBr, and the solution was allowed to stand at room temp for 20 h. This treatment liberates the aglycone as a solid black precipitate and also effects pinacol rearrangement of steviol to isosteviol.<sup>5</sup> The black precipitate was filtered and further purified by pre-adsorption on 70 g of 0.05-0.2 mm silica gel and elution with 2-3 L of 5:1 hexane-ethyl acetate. The yield of crude isosteviol (**15a**) was 12.5 g (2.4%): mp 228-230 °C (lit.<sup>6</sup> mp 230-231 °C). The <sup>1</sup>H and <sup>13</sup>C NMR data agree with the literature values for (±)-isosteviol.<sup>7</sup>

**Method B. From Stevia extract sweetener.** A mixture of Stevia extract (1.986 g) from the SweetLeaf Company and 48% HBr (10 mL) was stirred vigorously for 36 h. The black mixture was extracted with CH<sub>2</sub>Cl<sub>2</sub> (30 mL). The aqueous phase was extracted with CH<sub>2</sub>Cl<sub>2</sub> (2 x 50 mL), and the combined organic extracts were washed with water (1 x 50 mL) and dried (MgSO<sub>4</sub>). Rotary evaporation and recrystallization of the dark brown solid from hexane/acetone gave 0.474 mg (24%). The <sup>1</sup>H NMR spectra of the resulting isosteviol corresponded well with those of the product from Method A.

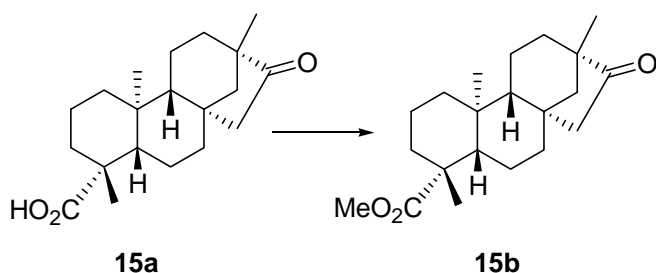

**Methyl *ent*-16-Oxobeyeran-19-oate (15b, Isosteviol methyl ester).** A solution of 2.18 g (10 mmol) of isosteviol (**1**) in 20 mL of methanol was stirred as ethereal diazomethane (generated from *N*-methyl-*N*-nitroso-*p*-toluenesulphonamide)<sup>8</sup> was added until a deep yellow color persisted. After nitrogen evolution ceased, the solution was heated on a steam bath briefly to expel excess diazomethane and was evaporated. Recrystallization from acetone provided 3.15 g (95%) of white crystalline isosteviol methyl

ester **15b**: mp 201-202 °C (lit.<sup>4a</sup> mp 202-203 °C). The <sup>1</sup>H and <sup>13</sup>C NMR data agree with the data in the literature.<sup>4b,9</sup>

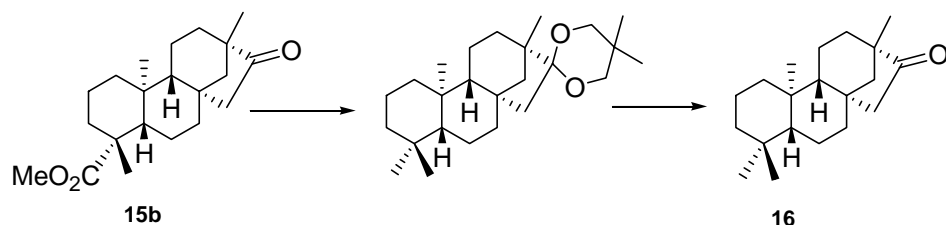

**ent-Beyeran-16-one (16)**. The conversion of the C-19 ester group to a methyl group was carried out according to the literature procedures used previously at the UIUC.<sup>4b, 10</sup> Purification of beyeran-16-one by flash chromatography on silica gel (5% EtOAc/hexane) and recrystallization from hexane gave an analytical sample: mp 103-104 °C (lit.<sup>6</sup> 103.5-104.5 °C; lit<sup>11</sup> 103-104 °C); TLC  $R_f$  0.35 (1:9 EtOAc:hexane); FTIR (CHCl<sub>3</sub>)  $\nu_{\max}$  3020, 1730 cm<sup>-1</sup>; <sup>1</sup>H NMR (400 MHz, CDCl<sub>3</sub>)  $\delta$  0.80 (s, 3H, C10 CH<sub>3</sub>), 0.81-0.84 (m, 1H), 0.85 (s, 3H, C4 CH<sub>3</sub>), 0.87 (s, 3H, C4 CH<sub>3</sub>), 0.89-0.93 (m, 1H), 0.96 (s, 3H, -C13 CH<sub>3</sub>), 1.09-1.43 (m, 8H), 1.49-1.69 (m, 8H), 1.75 (d, 1H,  $J$  = 18.4 Hz, H15<sub>endo</sub>), 2.68 (dd, 1H,  $J$  = 18.6, 3.6 Hz, H15<sub>exo</sub>); <sup>13</sup>C NMR (100.57 MHz, CDCl<sub>3</sub>)  $\delta$  14.9, 18.3, 19.8, 20.0, 20.1, 21.8, 33.1, 33.6, 37.3, 37.6, 39.4, 39.4, 41.3, 41.8, 48.7, 48.8, 54.5, 55.4, 56.3, 223.0. The <sup>1</sup>H NMR data agree with the lower field data in the literature.<sup>4b,7</sup>

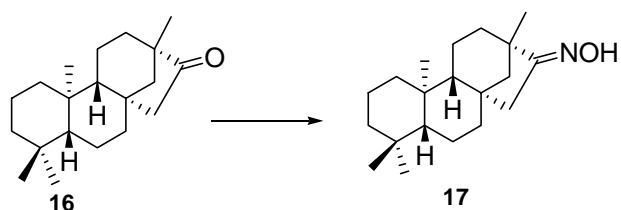

**ent-16-Beyeran-16-one Oxime (17)** A procedure described for **15b**<sup>4a</sup> was followed. A 1.50-g (4.94 mmol) portion of *ent*-beyeran-16-one (**16**) was allowed to react with 3.43 g (49.4 mmol) of NH<sub>2</sub>OH·HCl in 35 mL of pyridine for 20 h at room temp. The pyridine was evaporated, and the crude product was then extracted from a dilute HCl suspension with ether (3 x 50 mL). The combined ether extracts were washed with water (2 x 20 mL), dried (MgSO<sub>4</sub>), and evaporated. The solid residue was crystallized from

ether and light petroleum ether to afford 1.45 g (92%) of oxime **17** as a white crystals: mp 194-196 °C;  $[\alpha]_D^{25} -10.1^\circ$  ( $c = 1.98$ ,  $\text{CHCl}_3$ ); TLC  $R_f$  0.34 (1:4 EtOAc:hexane); FTIR ( $\text{CHCl}_3$ )  $\nu_{\text{max}}$  3334, 2919, 1681, 1455  $\text{cm}^{-1}$ ;  $^1\text{H}$  NMR (400 MHz,  $\text{CDCl}_3$ )  $\delta$  0.76-0.85 (m, 1H), 0.81 (s, 3H,  $\text{CH}_3$  at C-10), 0.86 (s, 3H,  $\text{CH}_3$  at C-4), 0.92 (s, 3H,  $\text{CH}_3$  at C-4), 1.06-1.16 (m, 1H), 1.10 (s, 3H,  $\text{CH}_3$  at C-13), 1.18-1.68 (m, 8H), 1.94 (d, 1H,  $J = 18.4$  Hz, H at C-15), 3.02 (dd, 1H,  $J = 19.2, 3.2$  Hz, H at C-15);  $^{13}\text{C}$  NMR (125.64 MHz,  $\text{CDCl}_3$ )  $\delta$  14.9, 18.3, 19.9, 20.0, 21.8, 22.1, 33.1, 33.6, 37.0, 37.6, 39.4, 39.5, 40.5, 40.7, 41.9, 43.7, 55.6, 56.3, 56.6, 170.7.

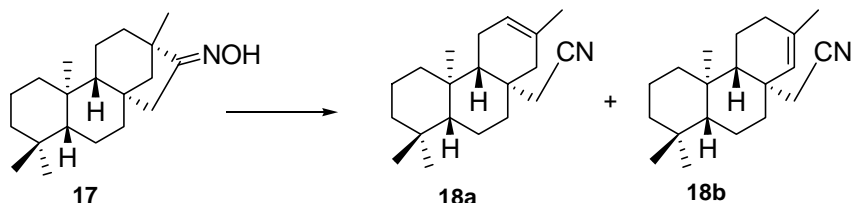

**ent-8 $\beta$ -Cyanomethyl-13-methyl-12-podocarpene and ent-8 $\beta$ -Cyanomethyl-13-methyl-13-podocarpene (18a and 18b).**<sup>12</sup> A literature procedure<sup>13</sup> was followed with modifications. A solution of p-TsCl (5.1 mmol, 0.98 g) and oxime **17** (1.4 g, 4.65 mmol) in 25 mL of DMF was stirred at room temp for 5 h. Water (60 mL) was added, and the product was extracted with hexane (3 x 100 mL). The combined hexane extracts were washed with satd  $\text{NaHCO}_3$  (1 x 30 mL), water (1 x 40 mL), and brine, and dried ( $\text{MgSO}_4$ ). Evaporation of the solvent afforded 1.35 g of a 2.64:1 mixture of nitriles **18a** and **18b** (GC analysis). A series of three successive column chromatographies using silica gel and 1% ether and hexane as eluent provided **18a** (0.82 g, 62%) and **18b** (0.42g, 32%) as crystalline solids. Data for **18a**: mp 122-125 °C;  $[\alpha]_D^{25} -18^\circ$  ( $c = 2.05$ ,  $\text{CHCl}_3$ ); TLC  $R_f$  0.40 (1:9 EtOAc:hexane); FTIR ( $\text{CHCl}_3$ )  $\nu_{\text{max}}$  3020, 2928, 2245, 1451  $\text{cm}^{-1}$ ;  $^1\text{H}$  NMR (400 MHz,  $\text{CDCl}_3$ ):  $\delta$  0.76-0.90 (m, 1H), 0.81 (s, 3H,  $\text{CH}_3$  at C-10), 0.82 (s, 3H,  $\text{CH}_3$  at C-4), 0.86 (s, 3H,  $\text{CH}_3$  at C-4), 1.05-1.44 (m, 6H), 1.46-1.61 (m, 3H), 1.64 (s, 3H,  $\text{CH}_3$  at C-13), 1.65-1.85 (m, 3H), 1.96-2.13(m, 3H), 2.40 and 2.51 (app ABdd, 2H,  $J_{\text{app}} = 16, 2$  Hz,  $\text{CH}_2\text{CN}$ ), 5.34 (bs, 1H,  $W_{1/2} = 9.5$  Hz, H at C-12);  $^{13}\text{C}$  NMR (100.57 MHz,  $\text{CDCl}_3$ )  $\delta$  15.4, 18.2, 18.2, 20.2, 21.5, 22.0, 23.3, 33.1, 33.2, 35.1, 36.8, 38.8, 39.4, 41.6, 45.8, 52.3, 56.5, 119.1, 119.8, 131.1.

Data for **18b**: mp 118-120 °C; TLC  $R_f$  0.40 (1:9 EtOAc:hexane);  $[\alpha]_D^{25} +56.7^\circ$  ( $c = 2.13$ ,  $\text{CHCl}_3$ ); FTIR ( $\text{CHCl}_3$ )  $\nu_{\text{max}}$  3019, 2930, 2246, 1451  $\text{cm}^{-1}$ ;  $^1\text{H}$  NMR (400 MHz,  $\text{CDCl}_3$ )  $\delta$  0.78 (s, 3H,  $\text{CH}_3$  at C-10), 0.80 (s, 3H,  $\text{CH}_3$  at C-4), 0.80-0.83 (m, 1H), 0.84 (s, 3H,  $\text{CH}_3$  at C-4), 0.85-0.91 (m, 1H), 1.06-1.75 (m, 10H), 1.63 (s, 3H,  $\text{CH}_3$  at C-13), 1.92-2.08 (m, 4H), 2.41 and 2.67 (app ABdd, 2H,  $J_{\text{app}} = 16, 1.6$  Hz,  $\text{CH}_2\text{CN}$ ), 5.33 (app q, 1H,  $J \sim 1$  Hz, H at C-14);  $^{13}\text{C}$  NMR (100.57 MHz,  $\text{CDCl}_3$ )  $\delta$  16.4, 17.4, 18.3, 18.4, 21.2, 23.1, 24.7, 31.6, 33.2, 33.3, 36.8, 36.9, 38.0, 39.4, 41.9, 55.1, 56.8, 119.3, 130.4, 134.2.

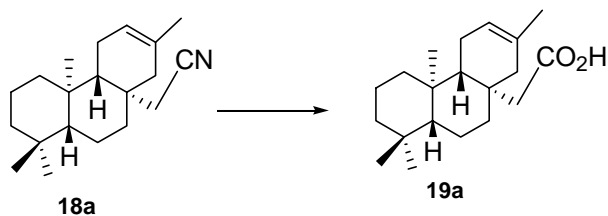

**ent-13-Methyl-12-podocarpene-8 $\beta$ -acetic Acid (19a).**<sup>12</sup> A literature procedure<sup>14</sup> was followed with modifications. A solution of **18a** (500 mg, 1.75 mmol) and 85% KOH (2.5 g, 35.7 mmol) in diethylene glycol (7.5 mL) and water (0.8 mL) in a metal bomb with a glass liner (volume capacity 50 mL) was heated at 195 °C under 450 psi pressure for 18 h. The mixture was cooled to room temp, diluted with water (50 mL), and extracted with ether (35 mL). After acidification of the aq. layer with cold conc HCl, the acidic product was extracted with ether (3 x 60 mL). The combined organic extracts were washed with water (2 x 10 mL), dried ( $\text{MgSO}_4$ ), and concentrated. Crystallization of the solid residue from ether-light petroleum afforded 490 mg (90%) of the acid **19a** as white crystals: mp 125-128 °C; TLC  $R_f$  0.4 (1:4 EtOAc:hexane);  $[\alpha]_D^{25} -28.6^\circ$  ( $c = 2.13$ ,  $\text{CHCl}_3$ ); FTIR( $\text{CHCl}_3$ )  $\nu_{\text{max}}$  2928, 1700, 1446  $\text{cm}^{-1}$ ;  $^1\text{H}$  NMR (400 MHz,  $\text{CDCl}_3$ )  $\delta$  0.75-0.84 (m, 1H), 0.82 (s, 3H,  $\text{CH}_3$ ), 0.86 (s, 6H, 2x $\text{CH}_3$ ), 0.87-0.92(m, 1H), 1.06-1.27 (m, 4H), 1.34-1.47 (m, 3H), 1.53-1.59 (m, 2H), 1.60 (s, 3H,  $-\text{CH}_3$ ), 1.68-1.88 (m, 2H), 1.96-2.05(m, 2H), 2.21 (dt, 1 H,  $J = 13.6, 3.2$  Hz), 2.35 and 2.46 (app ABdd, 2H,  $J_{\text{app}} = 12.8, 1.2$  Hz,  $\text{CH}_2\text{COOH}$ ), 5.36 (br s, 1H, =CH);  $^{13}\text{C}$  NMR (100.57 MHz,  $\text{CDCl}_3$ )  $\delta$  15.5, 18.4, 18.4, 21.6, 22.3, 23.3, 33.2, 33.4, 35.1, 36.1, 37.1, 38.8, 39.5, 41.8, 45.2, 54.2, 56.0, 119.6, 131.7, 180.1.

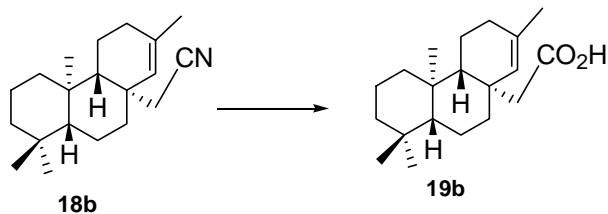

**ent-13-Methyl-13-podocarpene-8 $\beta$ -acetic Acid (19b).**<sup>12</sup> Hydrolysis of **18b** (50 mg, 0.17 mmol) as described above for **18a** in a solution of 85% KOH (250 mg), diethylene glycol (0.75 mL), and water (0.08 mL) in a metal bomb with a glass liner (volume capacity 10 mL) and extractive workup furnished **19b** as a white solid: yield, 53 mg (92%); TLC  $R_f$  = 0.40 (1:4 ethyl acetate:hexane);  $^1\text{H}$  NMR (400 MHz,  $\text{CDCl}_3$ ):  $\delta$  0.77-0.93 (m, 2H), 0.80 (s, 3H,  $\text{CH}_3$ ), 0.81 (s, 3H,  $\text{CH}_3$ ), 0.85 (s, 3H,  $\text{CH}_3$ ), 1.09-1.19 (m, 4H), 1.33-1.46 (m, 5H), 1.57- 1.73 (m, 4H), 1.61 (s, 3H,  $\text{CH}_3$ ), 1.89-2.08 (m, 3H), 2.25 (dt, 1H,  $J$  = 13.2, 3.2 Hz), 2.36 and 2.63 (app ABdd, 2H,  $J_{\text{app}}$  = 13.2, 1.6 Hz,  $-\text{CH}_2\text{COOH}$ ), 5.24 (app q, 1H,  $J$  = 1.6 Hz, =CH).

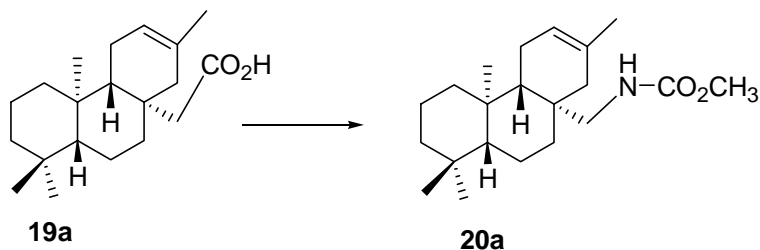

**ent-N-Methoxycarbonyl-8 $\beta$ -aminomethyl-13-methyl-12-podocarpene (20a).**<sup>12</sup> A literature procedure<sup>15</sup> was followed with modifications. A solution of unsaturated acid **19a** (305 mg, 1.0 mmol), triethylamine (140.5  $\mu\text{L}$ , 1.0 mmol), and diphenyl phosphorylazide (215.5  $\mu\text{L}$ , 1.0 mmol) in benzene (5 mL) was stirred and heated at reflux for 2 h. Methanol (0.40 mL, 10 mmol) and triethylamine (140.5  $\mu\text{L}$ , 1.0 mmol) were added, and the solution was stirred for 15 h at reflux temp to convert the isocyanate to the carbamate. The solution was diluted with 25 mL of ether, washed with 10% aq citric acid (2 x 8 mL) and 10% aq.  $\text{NaHCO}_3$  (2 x 8 mL), dried ( $\text{MgSO}_4$ ), and concentrated. Purification of the crude product (340 mg) by chromatography on silica gel (9:1 hexane:diethylether) provided **20a** (267 mg, 80%) as a sticky oil that was an 11:1 mixture of N- $\text{CO}_2\text{Me}$  rotamers: TLC  $R_f$  0.23 (1:9 EtOAc:hexane); FTIR( $\text{CHCl}_3$ )  $\nu_{\text{max}}$  2925, 1722, 1522, 1449  $\text{cm}^{-1}$ ;  $^1\text{H}$  NMR (400 MHz,  $\text{CDCl}_3$ ):  $\delta$  0.76-1.00 (m, 4H), 0.82, 0.84, 0.90 (3s, 3 x

3H, CH<sub>3</sub>), 1.11 (td, 1H,  $J = 12.2, 4.4$  Hz), 1.23-1.59 (m, 8 H), 1.60 (s, 3H, CH<sub>3</sub> at C-13), 1.76-2.03 (m, 5H), 3.03 (app dd, 1H,  $J_{\text{app}} = 13.6, 4.4$  Hz, CH<sub>2</sub>N), 3.48 (app dd,  $J_{\text{app}} = 13.6, 7.6$  Hz, 1H CH<sub>2</sub>N), 3.64 (s, 2.75 H, CO<sub>2</sub>CH<sub>3</sub>), 3.68 (s, 0.25 H, CO<sub>2</sub>CH<sub>3</sub>), 4.42 (br, ~ 0.1H NHCO<sub>2</sub>Me), 4.50 (br t, ~0.9 H,  $J=6$  Hz, NHCO<sub>2</sub>Me), 5.38 (m, 1H, H at C-12); <sup>13</sup>C NMR (100.57 MHz, CDCl<sub>3</sub>)  $\delta$  16.0, 18.50, 18.53, 21.6, 22.3, 23.5, 33.2, 33.4, 37.0, 37.1, 37.4, 39.6, 40.3, 41.9, 43.5, 52.0, 53.5, 57.1, 120.8, 131.0, 157.6.

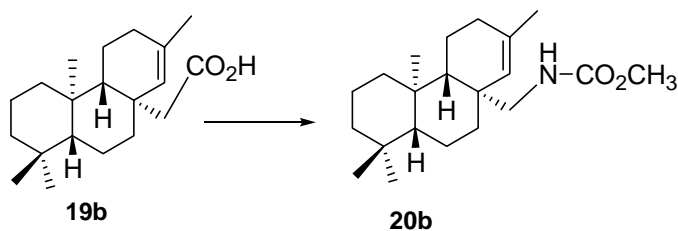

**ent-N-Methoxycarbonyl-8 $\beta$ -aminomethyl-13-methyl-13-podocarpene (20b).** The pure  $\Delta^{13}$  isomer **19b** (30mg, 0.098 mmol) was converted to carbamate **20b** (26 mg, 82%) following the procedure described above for **20a**. Tentative data from a spectrum of the crude carbamate: <sup>1</sup>H NMR (500 MHz, CDCl<sub>3</sub>)  $\delta$  0.83, 0.84, 0.87 (s, 3H, CH<sub>3</sub>), 1.10-1.18 (m, 3H), 1.34-1.83 (m, 11H), 1.62 (s, 3H, CH<sub>3</sub>), 1.99-2.08 (m, 3H), 2.97-3.04 (m, 1H), 3.66 (s, 3H, CO<sub>2</sub>CH<sub>3</sub>), 3.71-3.77 (m, 1H), 4.56-4.62 (m, 1H), 5.08 (bs, 1H, =CH).

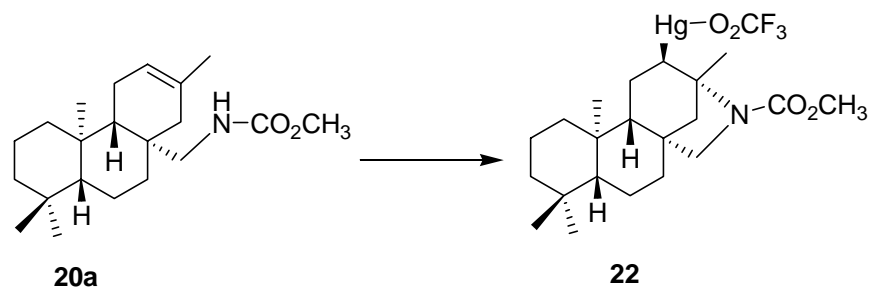

**Isolation of Organomercurial Intermediate 22.** The reaction of mercuric trifluoroacetate (22 mg, 0.15 mmol) and carbamate **20a** (20 mg, 0.059 mmol) in 2 mL of THF was carried out as described in the Experimental Section for 16 h at room temp. The reaction was judged to be complete by TLC ( $R_f = 0.22$ , 1:4 EtOAc : petroleum ether). The reaction mixture diluted with ether (20 mL), and the ethereal solution was washed with water (1 x 10 mL), satd NaHCO<sub>3</sub> (1 x 10 mL), and brine (1 x 20 mL), and dried (MgSO<sub>4</sub>). Evaporation afforded the organomercurial intermediate (**22**) (38 mg, 99%) as a polar white



solid that was a 2:1 mixture of N-CO<sub>2</sub>Me rotamers: TLC  $R_f$  0.22 (1:4 EtOAc:hexane); <sup>1</sup>H NMR (400 MHz, CDCl<sub>3</sub>) δ 0.77-0.89 (m, 3H), 0.80, 0.86, 0.94 (3s, 9H, 3CH<sub>3</sub>), 1.10-1.28 (m, 4H), 1.36-1.68 (m, 6H), 1.51 (s, 1H, CH<sub>3</sub>), 1.60 (s, 2H, CH<sub>3</sub>), 1.84 (dd, 0.7H,  $J = 9, 2$  Hz), 1.88-2.00 (m, 1.4 H), 2.10 (d, ~0.65H,  $J = 3$  Hz), 2.14 (d, 0.35H,  $J = 3$  Hz), 2.95 (d, ~0.65H,  $J = 8.8$  Hz, H15 endo), 3.02 (d, ~0.35H,  $J = 8.8$  Hz, H15 endo), 3.37 (br, 0.35H,  $W_{1/2} = 7-8$  Hz, CHHg), 3.56 (br, 0.65H,  $W_{1/2} = 7-8$  Hz, CHHg), 3.65 (s, 2H, CO<sub>2</sub>CH<sub>3</sub>), 3.69 (s, 1H, CO<sub>2</sub>CH<sub>3</sub>), 3.91 (dd, 0.65H,  $J = 8.8, 1.2$  Hz, H15exo), 4.00 (d, 0.35H,  $J \cong 8$  Hz, H15 exo).

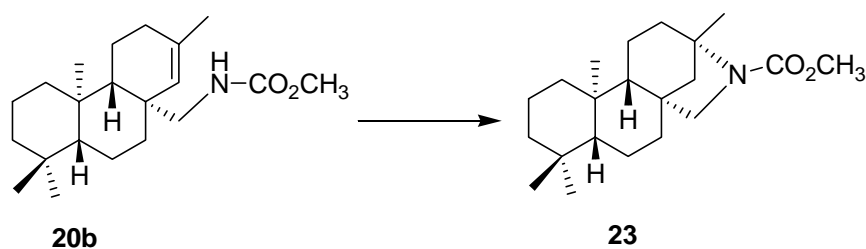

**Methyl *ent*-16-Azabeyerane-16-carboxylate (23.) from the  $\Delta^{13}$  Carbamate 20b.** The pure  $\Delta^{13}$  isomer **20b** (10 mg, 0.03 mmol) was converted to cyclic carbamate **23** (9 mg, 95%) following the procedure described in the Experimental Section. The time for complete cyclization (ca. 16 h) estimated by TLC analyses during the reaction was about the same as the  $\Delta^{12}$  isomer. The spectral data for the product were identical to those given in the Experimental Section.

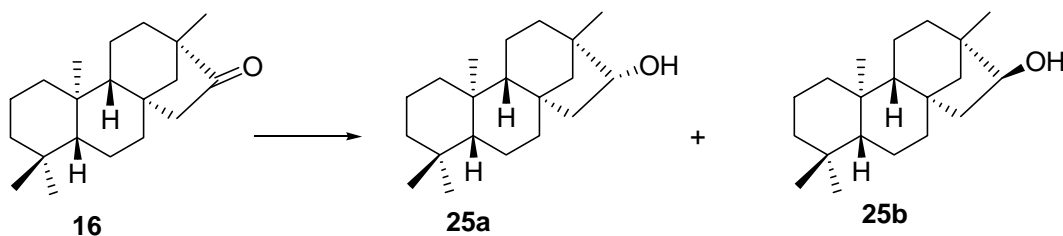

***ent*-Beyeran-16 $\beta$ - and 16 $\alpha$ -ols (25a and 25b).** A literature procedure for isosteviol methyl ester (**15b**) was followed.<sup>4a</sup> A solution of beyerene-16-one (**16**, 600 mg, 2.09 mmol), isopropyl alcohol (20 mL), acetone (2.5 mL), and 6.27 g (30.5 mmol) of aluminum isopropoxide was stirred and heated at reflux temperature as acetone was distilled (through a Vigreux distillation apparatus) over a 24-h period.<sup>16</sup> Isopropyl alcohol was added to keep the volume of solvent approximately constant. The mixture was

then heated at reflux temp for an additional 16 h. The solvent was evaporated, 1.5 N HCl (10 mL) was added, and the product was extracted with hexane (3 x 30 mL). The combined ethereal extracts were washed with water (2 x 15 mL) and brine (1 x 15 mL) and dried (MgSO<sub>4</sub>). Evaporation of the solvent afforded 600 mg of a mixture of **25a** and **25b** according to GC analysis. A series of three successive column chromatographies on silica gel with 4% ether and hexane as eluent provided 180 mg (30%) of **25a** and 220 mg (36%) of **25b** after crystallizations from hexane. Data for **25a**: mp 118-120 °C (lit.<sup>17</sup> for (±)-**25a**, oil); [α]<sub>D</sub><sup>25</sup> -27° (c = 2.0, CHCl<sub>3</sub>); <sup>1</sup>H NMR (400 MHz, CDCl<sub>3</sub>) δ 0.77-0.81 (m, 1H), 0.79 (s, 3H, -CH<sub>3</sub>), 0.84 (s, 3H, CH<sub>3</sub>), 0.89 (s, 3H, CH<sub>3</sub>), 0.89 (s, 3H, -CH<sub>3</sub>), 0.97-1.77 (m, 18H), 1.85 (app. ddd, 1 H, J = 14.3, 4.8, 2.8 Hz), 3.84 (dd, 1H, J = 4.8 Hz, CHOH); <sup>13</sup>C NMR (100.57 MHz, CDCl<sub>3</sub>) δ 14.8, 18.3, 20.1, 20.1, 21.9, 24.9, 33.1, 33.6, 33.7, 37.6, 39.5, 41.5, 41.9, 42.0, 42.0, 43.1, 55.5, 56.2, 80.7.

Data for **25b**: mp 98-101 °C (lit<sup>11</sup> 98-101 °C, lit<sup>18</sup> 102-103 °C); [α]<sub>D</sub><sup>25</sup> +5.6° (c= 2.0, CHCl<sub>3</sub>); TLC R<sub>f</sub> 0.34 (1:9 EtOAc:hexane); <sup>1</sup>H NMR (400 MHz, CDCl<sub>3</sub>) δ 0.78-0.82 (m, 2H), 0.80 (s, 3H, CH<sub>3</sub>), 0.85 (s, 3H, CH<sub>3</sub>), 0.87-0.92 (m, 2H), 0.93 (s, 3H, CH<sub>3</sub>), 0.98-1.27 (m, 6H), 1.31-1.63(m, 13H), 2.59 (ddd, 1H, J = 14.3, 7.6, 2.4 Hz, CHCHOH), 3.70-3.74(m, 1H); <sup>13</sup>C NMR (100.57 MHz, CDCl<sub>3</sub>) δ 14.9, 18.4, 19.7, 20.1, 21.2, 21.9, 33.1, 37.5, 38.2, 39.6, 41.0, 41.9, 42.7, 43.7, 45.9, 53.6, 55.5, 56.3, 79.3. The <sup>1</sup>H NMR data agree with the lower field data in the literature.<sup>11,18</sup>

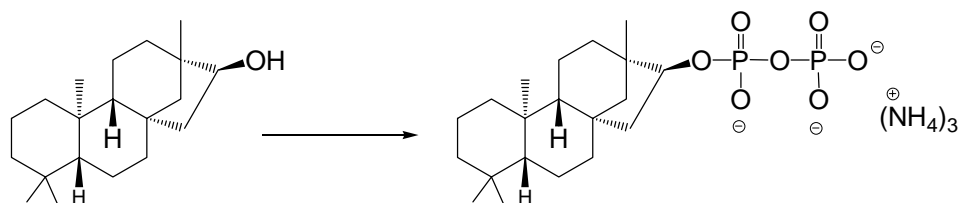

**ent-Beyeran-16α-yl Diphosphate, Ammonium Salt (11)**<sup>12</sup> The Cramer-Danilov pyrophosphorylation developed by Assink<sup>19</sup> was followed with modification. A solution of *ent*-beyeran-16 *exo*-ol (**25b**, 80 mg, 0.27 mmol) in CCl<sub>3</sub>CN (0.82 mL, 8.1 mmol) was magnetically stirred at room temp as Bu<sub>4</sub>NH<sub>2</sub>PO<sub>4</sub> (0.45 g, 1.35 mmol) in CH<sub>3</sub>CN (2 mL) was added. After 20 min 2% ammonia-methanol (5 mL) was added, and 10 min later, the solvent was removed under reduced pressure. A suspension of the remaining yellow oil

in 2 % ammonia-methanol (20 mL) was centrifuged to precipitate most of the inorganic salts. The supernatant was concentrated to yield a cloudy yellow oil that was loaded onto a Dowex<sup>®</sup> 1x8-400 gravity column (1.5 cm x 17 cm, formate form, Dowex<sup>®</sup> 1X8-400 chloride form resin was washed in a Buchner funnel successively with 400 mL of 5% NaOH, 200 mL of 1 M formic acid, 200 mL of deionized water, and 200 mL of 0.05 M NH<sub>4</sub>HCO<sub>2</sub> in MeOH to exchange chloride with formate anion). The gradient column was eluted with 1.0 L of 0.05 M – 0.5 M NH<sub>4</sub>HCO<sub>2</sub> in MeOH. The 30 fractions (~15 mL) collected were analyzed by silica TLC (6:3:1 *i*-PrOH: conc NH<sub>4</sub>OH : H<sub>2</sub>O as developing solvent, anisaldehyde stain). Fractions 1-5 contained monophosphate (TLC  $R_f \sim 0.55$ ). Fractions 13-20 containing diphosphate **11** (TLC  $R_f \sim 0.3$ ) were concentrated separately, the resulting white solids were dissolved in water (5 mL), and the solutions were lyophilized (~0.0025 mm Hg) overnight. The purity of each fraction was assessed by <sup>1</sup>H and <sup>31</sup>P NMR analyses in D<sub>2</sub>O: formate ( $\delta_H \sim 8.2$  ppm) and methyl monophosphate ( $\delta_H \sim 7.8$  ppm, s). Fractions free of the methyl monophosphate impurity were combined and concentrated. Dissolution of the residue in water (3 mL) and lyophilization gave diphosphate **11** as a white solid: yield 34 mg (24%); <sup>1</sup>H NMR (400 MHz, D<sub>2</sub>O)  $\delta$  0.64 (s, 3H, CH<sub>3</sub>), 0.68 (s, 3H, CH<sub>3</sub>), 0.75 (s, 3H, CH<sub>3</sub>), 0.77 (s, 3H, CH<sub>3</sub>), 0.92-1.22 (m, 8H), 1.3-1.5 (m, 12H), 2.50-2.58 (m, 1H, CHCHOH), 4.04-4.12 (m, 1H, CHOPP); <sup>31</sup>P NMR (162 MHz, D<sub>2</sub>O)  $\delta$  -10.11 (d, 1P,  $J = 20.7$  Hz), -9.67 (d, 1P,  $J = 20.7$  Hz).

## References

1. Still, W.C.; Kahn, M.; Mitra, A. *J. Org. Chem.* **1978**, *43*, 2923-2925.
2. The plant material was purchased from Penn Herb Co. Ltd, 10601 Decatur Road, Suite No. 2, Philadelphia, PA 19154.
3. Ruddat, M.; Heftmann, E.; Lang, A. *Arch. Biochem. Biophys.* **1965**, *110*, 496-499.
4. (a) Coates, R. M.; Bertram E. F. *J. Org. Chem.* **1971**, *36*, 2625-2631. (b) Coates, R. M.; Kang, H-Y. *J. Org. Chem.* **1987**, *52*, 2065-2074.
5. Mossetig, E.; Beglinger, F. Dolder.; Lichti, H.; Quitt, P.; Waters, J. A. *J. Am. Chem. Soc.* **1963**, *85*, 2305-2309.

6. Wood, H. B.; Allerton, R.; Diehl, H. W.; Fletcher, H. G. Jr. *J. Org. Chem.* **1955**, *20*, 875-883.
7. Snider, B. B.; Kieselgof, J. Y.; Foxman, B. M. *J. Org. Chem.* **1998**, *63*, 7945-7952.
8. Furniss, B. S.; Hannaford, A. J.; Smith, P. W. G.; Tatchell, A. R. *Vogel's Textbook of Practical Organic Chemistry*, 5th Ed., Longman Scientific & Technical: New York, 1989, p. 432.
9. Avent, A. G.; Hanson, J. R.; De Olivera, B. H. *Phytochemistry* **1990**, *29*, 2712-2715.
10. Crossley, N. S.; Dowell, R. *J. Chem. Soc. C* **1971**, 2496-2498.
11. Bowen, D. H.; Cloke, C.; MacMillan, J. *J. Chem. Soc., Perkin Trans. I* **1975**, 378-382.
12. The IUPAC nomenclature was followed according to which the  $\alpha$  or  $\beta$  configuration of substituents in *ent*-diterpenes is that designated in the systematic name for the "normal" antipode. See Rigaudy, J.; Klesney, S. P. *Nomenclature of Organic Chemistry, Sections A, B, C, D, E, F, and H*; Pergamon Press: Oxford, 1979, p 511.
13. Mammato, D. C.; Eadon, G.A. *J. Org. Chem.* **1975**, *40*, 1784-1792.
14. Corey, E. J.; Kania, R. S. *J. Am. Chem. Soc.* **1996**, *118*, 1229-1230.
15. De Kimpe, N.; Boeykens, M.; Tehrani, K. A. *J. Org. Chem.* **1994**, *59*, 8215-8219.
16. Wilcox, C. F.; Sexton, M. Jr.; Wilcox, M. F. *J. Org. Chem.* **1963**, *28*, 1079-1082.
17. Bell, R. A.; Ireland, R. E.; Mander, L. N. *J. Org. Chem.* **1966**, *31*, 2536-2542.
18. Sobti, R. R.; Dev, S. *Tetrahedron Lett.* **1966**, *33*, 3939-3942.
19. Assink, B. K. MS thesis, University of Illinois at Urbana-Champaign, 1999.

STANDARD 1H OBSERVE

```

exp1 stdlh
SAMPLE
date Oct 16 2004 dn H1
solvent D2O dof 0
file exp dm nmn
ACQUISITION dmm c
sfreq 399.952 dmf 200
tn H1 dpwr 20
at 4.096 PROCESSING
np 65536 lb 0.30
sw 8000.0 wfile
fb 4400 proc ft
bs 16 fn not used
tpwr 63 math f
pw 9.0
d1 0 werr
tof -425.7 wexp
nt 100 wbs
ct 100 wat
alock n DISPLAY
gain not used sp -177.2
flags wp 4063.8
il n vs 60495
in n sc 0
dp y wc 250
bs nn hzmm 16.26
is 500.00
rfl 3856.1
xfl 1867.8
th 70
ins 100.000
nm ph
  
```

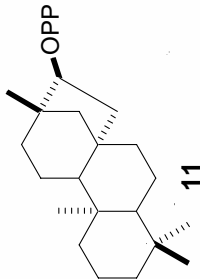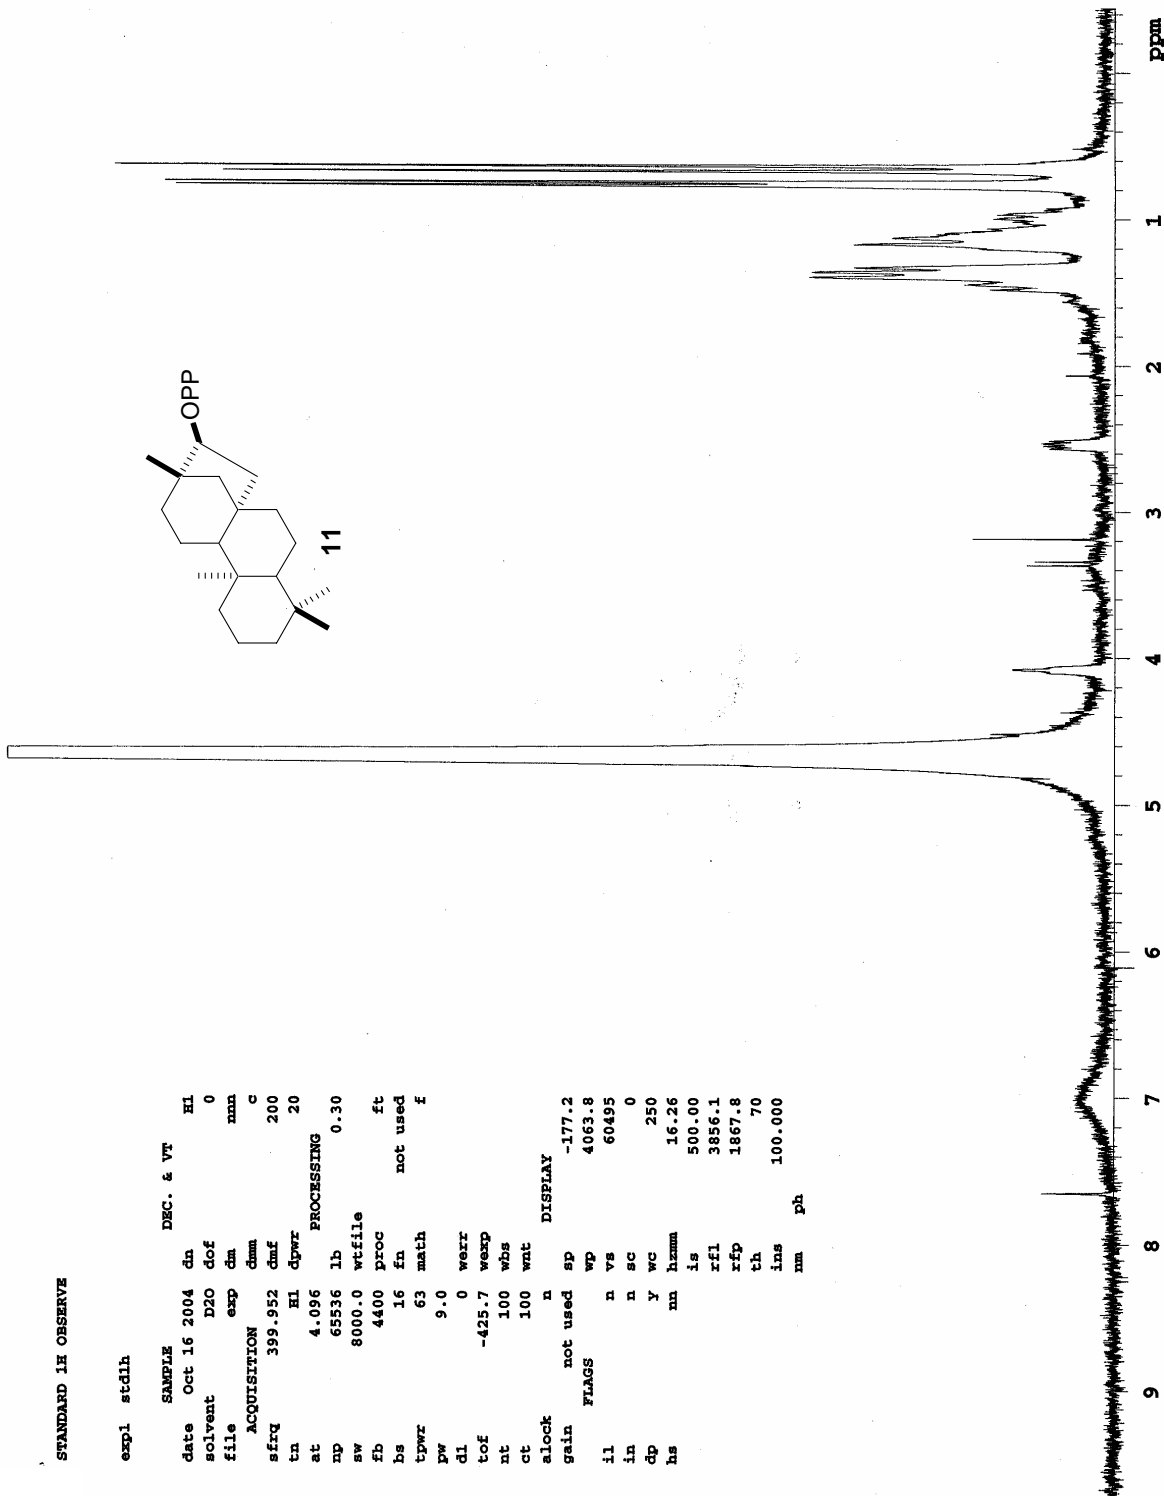

P31 OBSERVE - PHOSPHATE REGION

exp2 s2pul

|                  |               |
|------------------|---------------|
| SAMPLE           | DEC. & VT     |
| date Oct 17 2004 | dfrq 399.951  |
| solvent D2O      | dn H1         |
| file exp         | qprw 48       |
| ACQUISITION      | dof -1092.3   |
| sfrq 161.903     | dm YYY        |
| tn P31           | dum W         |
| at 0.819         | dmf 11111     |
| np 65536         | dseq          |
| sw 40000.0       | dres 1.0      |
| fb 22000         | homo n        |
| bs 16            | PROCESSING    |
| tpwr 54          | lb 3.00       |
| pw 4.7           | wfile         |
| dl 1.000         | proc ft       |
| tof 0            | fn not used   |
| nt 2000          | math not used |
| ct 1504          |               |
| alock n          | werr          |
| gain not used    | wexp          |
| FLAGS            | wbs           |
| il n             | wat           |
| in n             |               |
| cp y             |               |
| hs mn            |               |
| DISPLAY          |               |
| sp -2935.0       |               |
| wp 2263.3        |               |
| vs 162           |               |
| sc 0             |               |
| wc 250           |               |
| hzmm 9.05        |               |
| is 354.40        |               |
| rfl 19374.7      |               |
| rfp 0            |               |
| th 67            |               |
| ins 100.000      |               |
| nm               | ph            |

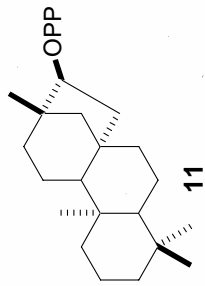

9.608  
9.736  
10.053  
10.181

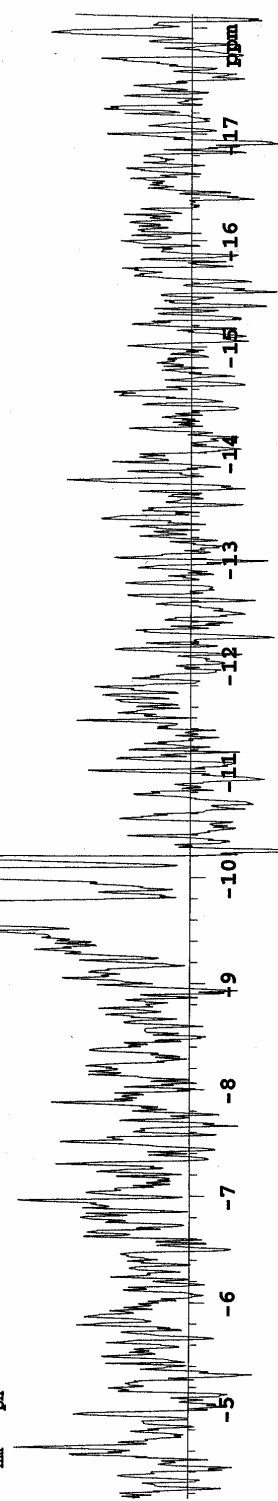

STANDARD 1H OBSERVE

exp1 std1h

|                  |           |            |
|------------------|-----------|------------|
| SAMPLE           | DEC. & VT | HL         |
| date Oct 20 2004 | dn        | 0          |
| solvent CDCl3    | dof       | mm         |
| file             | exp dm    | c          |
| ACQUISITION      | dma       | 200        |
| rq               | dmf       | 20         |
|                  | hl dpr    | 20         |
|                  | 4.096     | PROCESSING |
|                  | 65536     | lb         |
|                  | 8000.0    | wtfile     |
|                  | 4400      | proc       |
|                  | 16        | fn         |
|                  |           | not used   |
|                  | 63        | math       |
| tpwr             | 9.0       |            |
| pw               | 0         | werr       |
| di               | -425.7    | wepf       |
| tdf              | 8         | whs        |
| nt               | 8         | wnt        |
| ct               | n         |            |
| alock            | n         | DISPLAY    |
| gain             | not used  | sp         |
|                  |           | wp         |
| FLAGS            |           | 2891.0     |
| il               | n         | vs         |
| in               | n         | sc         |
| dp               | y         | wc         |
| hs               | na        | hzmm       |
|                  | is        | 500.00     |
|                  | rfl       | 4903.2     |
|                  | rfd       | 2903.6     |
|                  | th        | 20         |
|                  | ins       | 100.000    |
|                  | na        | ph         |

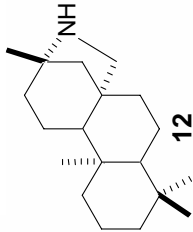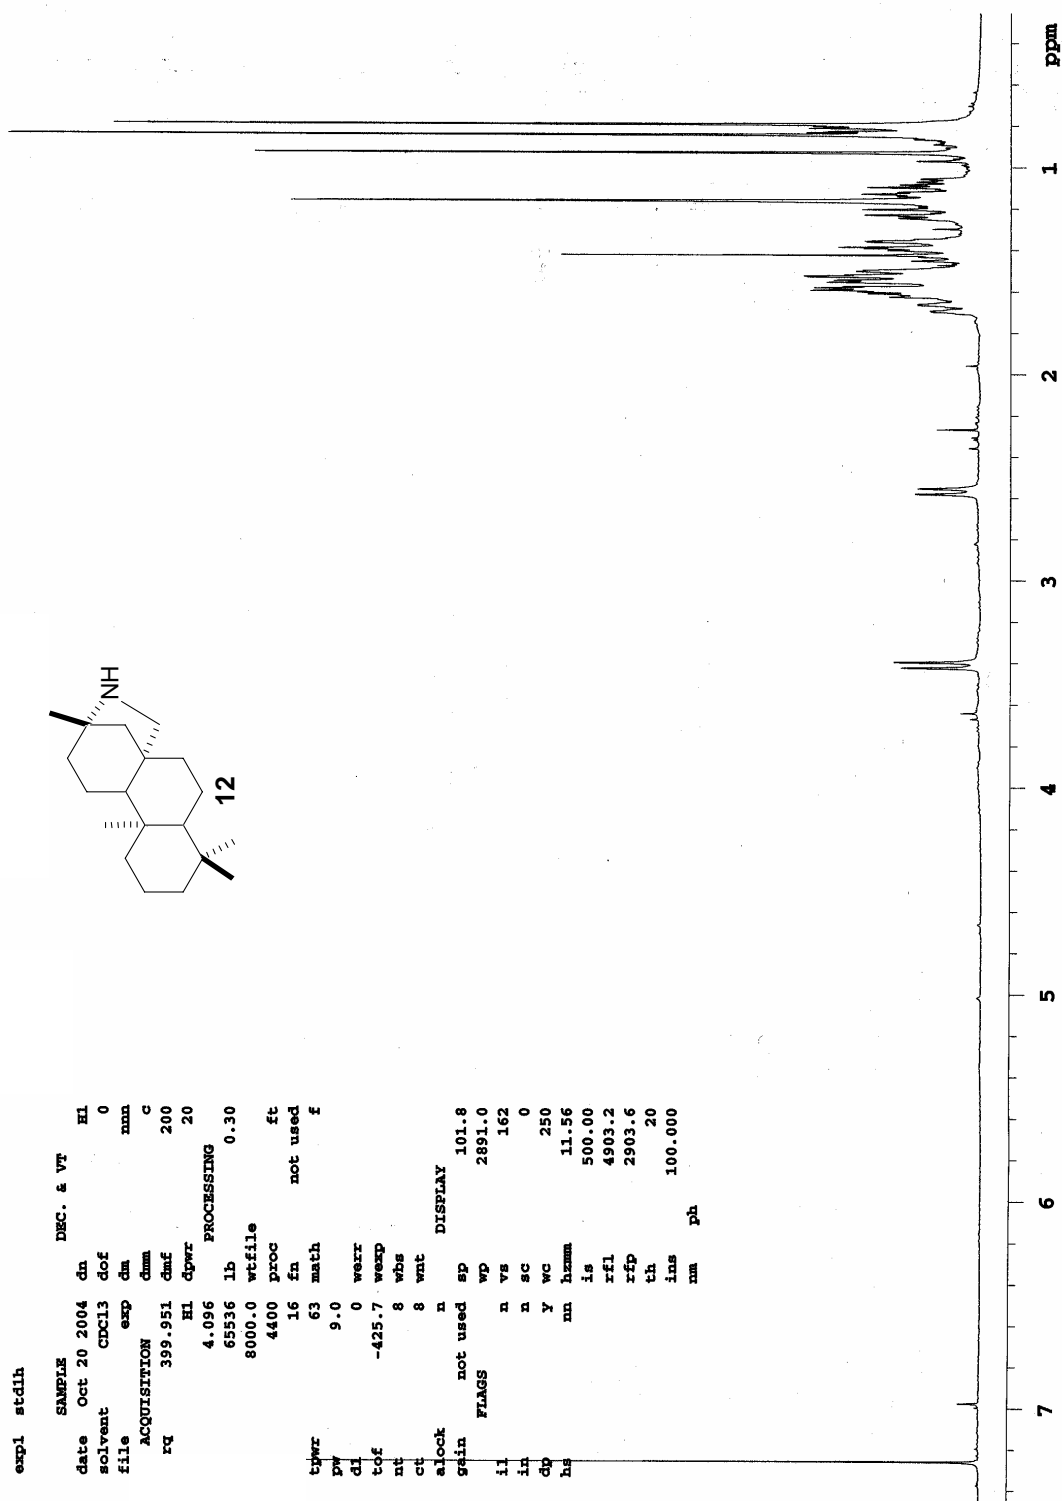

| INDEX | FREQUENCY (PPM) | FREQUENCY (HZ) | HEIGHT |
|-------|-----------------|----------------|--------|
| 1     | 77.506          | 9738.476       | 26.8   |
| 2     | 77.256          | 9707.175       | 26.8   |
| 3     | 77.000          | 9674.953       | 28.4   |
| 4     | 56.507          | 7099.983       | 25.1   |
| 5     | 56.148          | 7054.872       | 31.5   |
| 6     | 55.312          | 6949.922       | 8.5    |
| 7     | 45.494          | 5716.293       | 7.1    |
| 8     | 42.153          | 5296.491       | 23.4   |
| 9     | 39.918          | 5015.702       | 7.1    |
| 10    | 39.831          | 5004.654       | 24.7   |
| 11    | 39.112          | 4914.434       | 17.1   |
| 12    | 37.882          | 4759.770       | 12.0   |
| 13    | 33.910          | 4260.794       | 21.6   |
| 14    | 33.339          | 4188.986       | 14.1   |
| 15    | 26.942          | 3385.286       | 8.2    |
| 16    | 22.121          | 2779.519       | 26.9   |
| 17    | 22.004          | 2764.789       | 4.2    |
| 18    | 20.575          | 2585.268       | 22.0   |
| 19    | 20.385          | 2561.332       | 4.4    |
| 20    | 20.282          | 2548.444       | 19.0   |
| 21    | 18.597          | 2336.701       | 26.2   |
| 22    | 15.073          | 1893.684       | 21.1   |

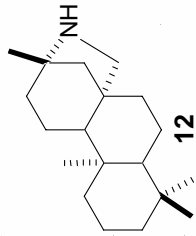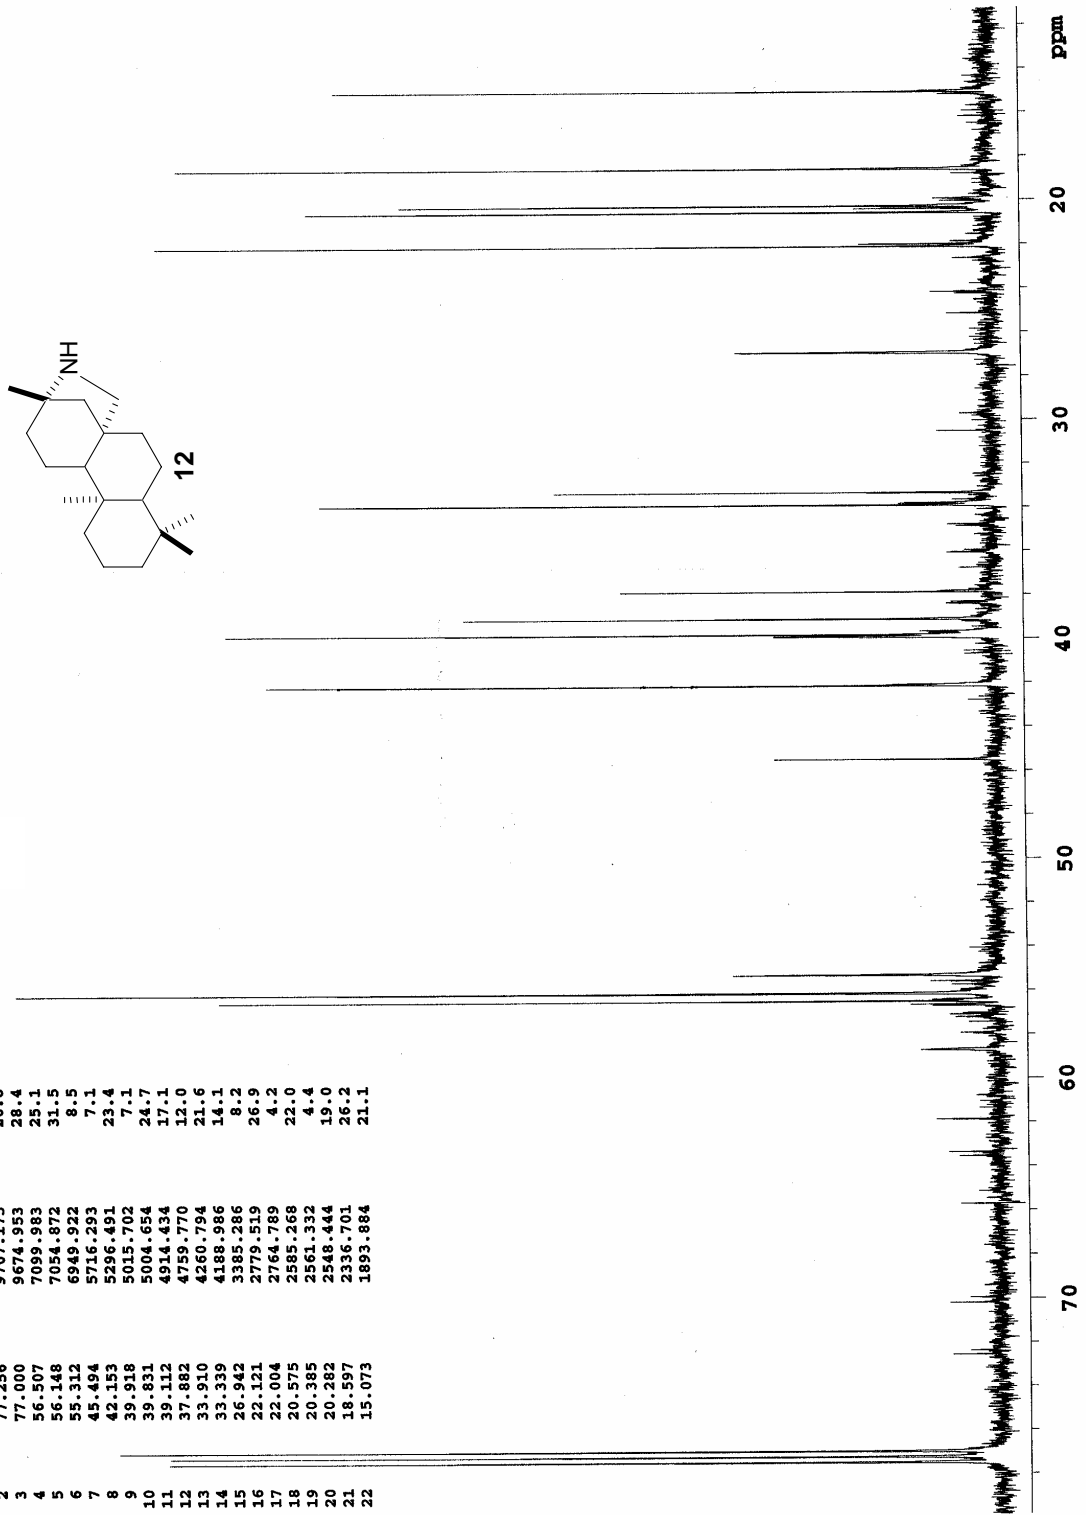



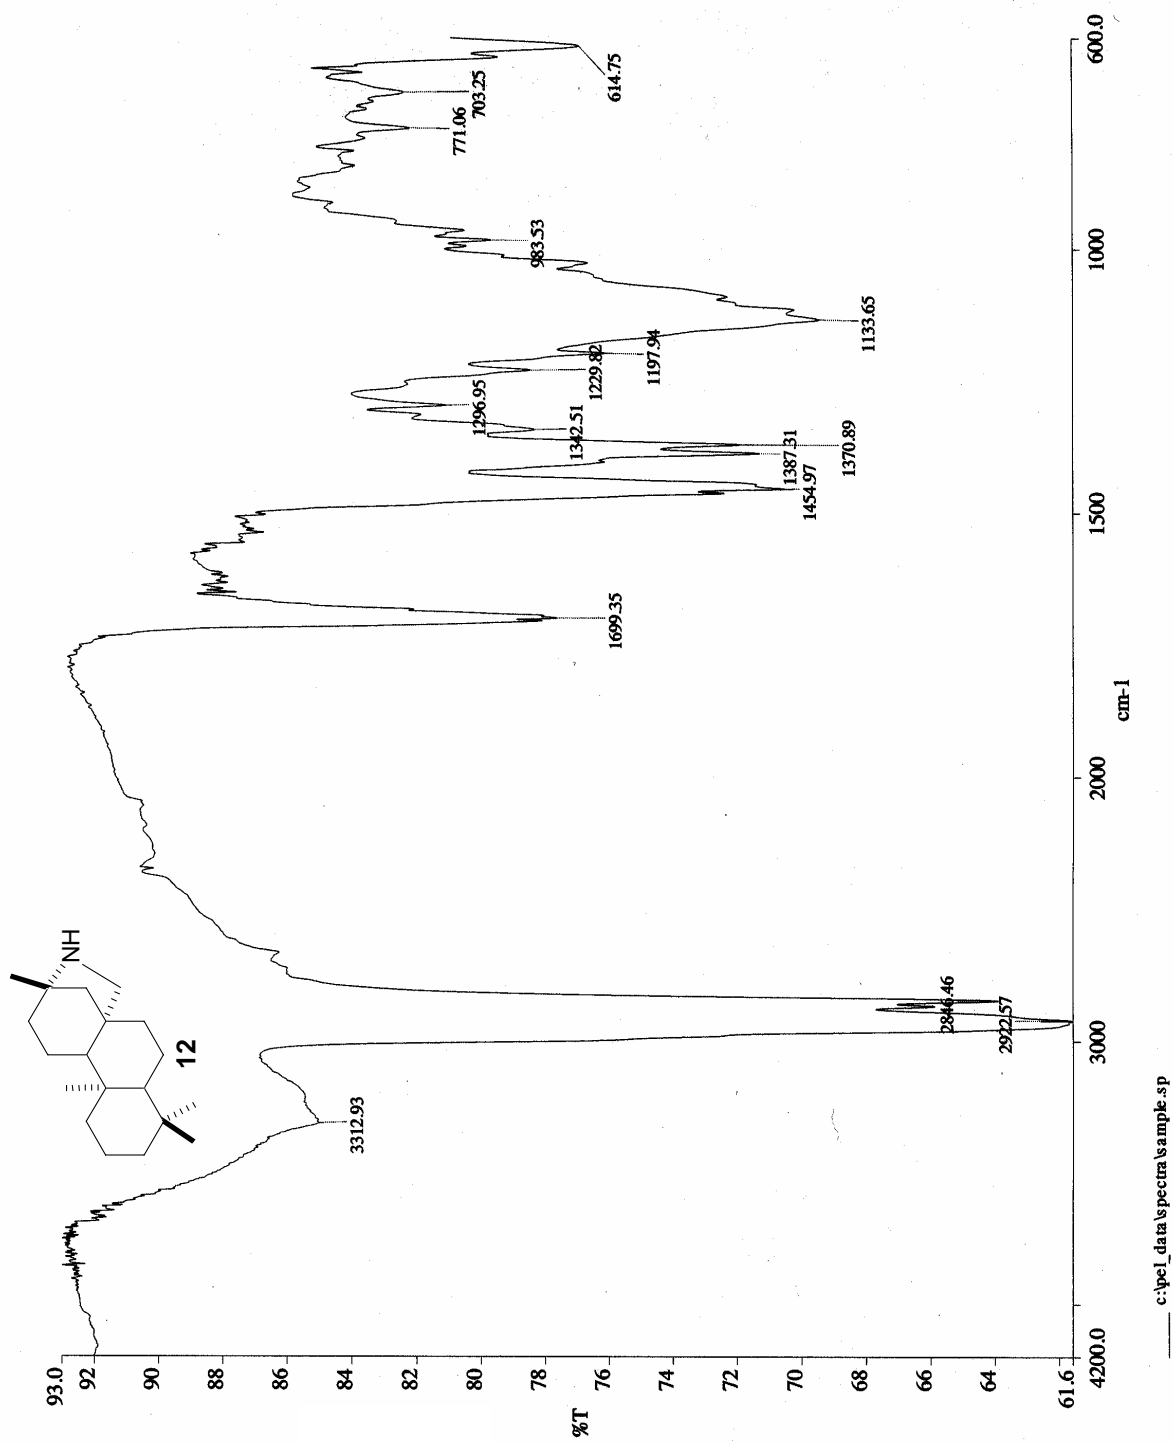

Amab Roy, AR\_II  
Qtof\_5423 21 (1.513)

1: TOF MS ES+  
3.04e3

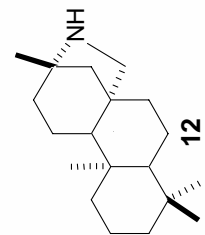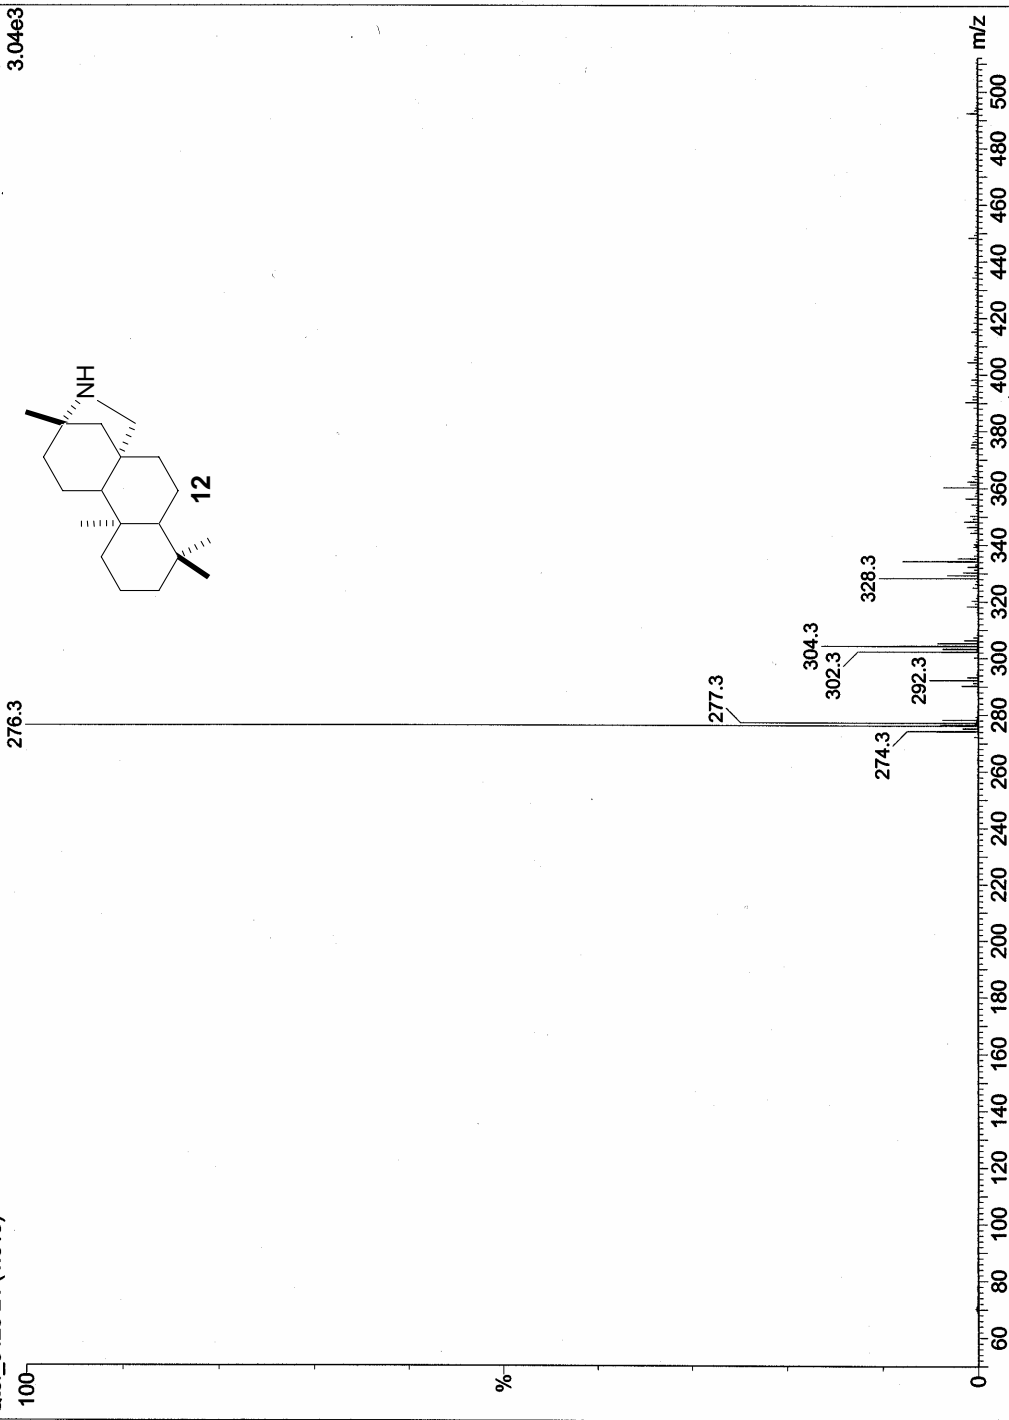

STANDARD 1H OBSERVE

```

exp1 stdlh
SAMPLE
date Mar 7 2005 dn H1
solvent CDCl3 dof 0
file exp dm nmn
ACQUISITION cmm c
sfrq 399.951 dmf 200
tn H1 dpwr 20
at 4.096 PROCESSING
np 65536 lb 0.30
sw 8000.0 wfile
fb 4400 pproc ft
bs 16 fn not used
tpwr 63 math f
PW 9.0
dl 0 werr
tof -425.7 weexp
nt 4 whs
ct 4 wnt
alock n DISPLAY
gain not used sp 148.4
FLAGS wp 2879.5
il n vs 162
in n sc 0
dp y wc 250
hs mn hnm 11.52
is 500.00
rfi 4903.2
rfp 2903.6
th 20
ins 100.000
nm ph
  
```

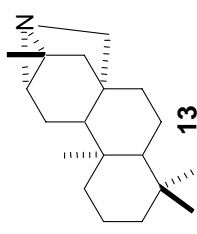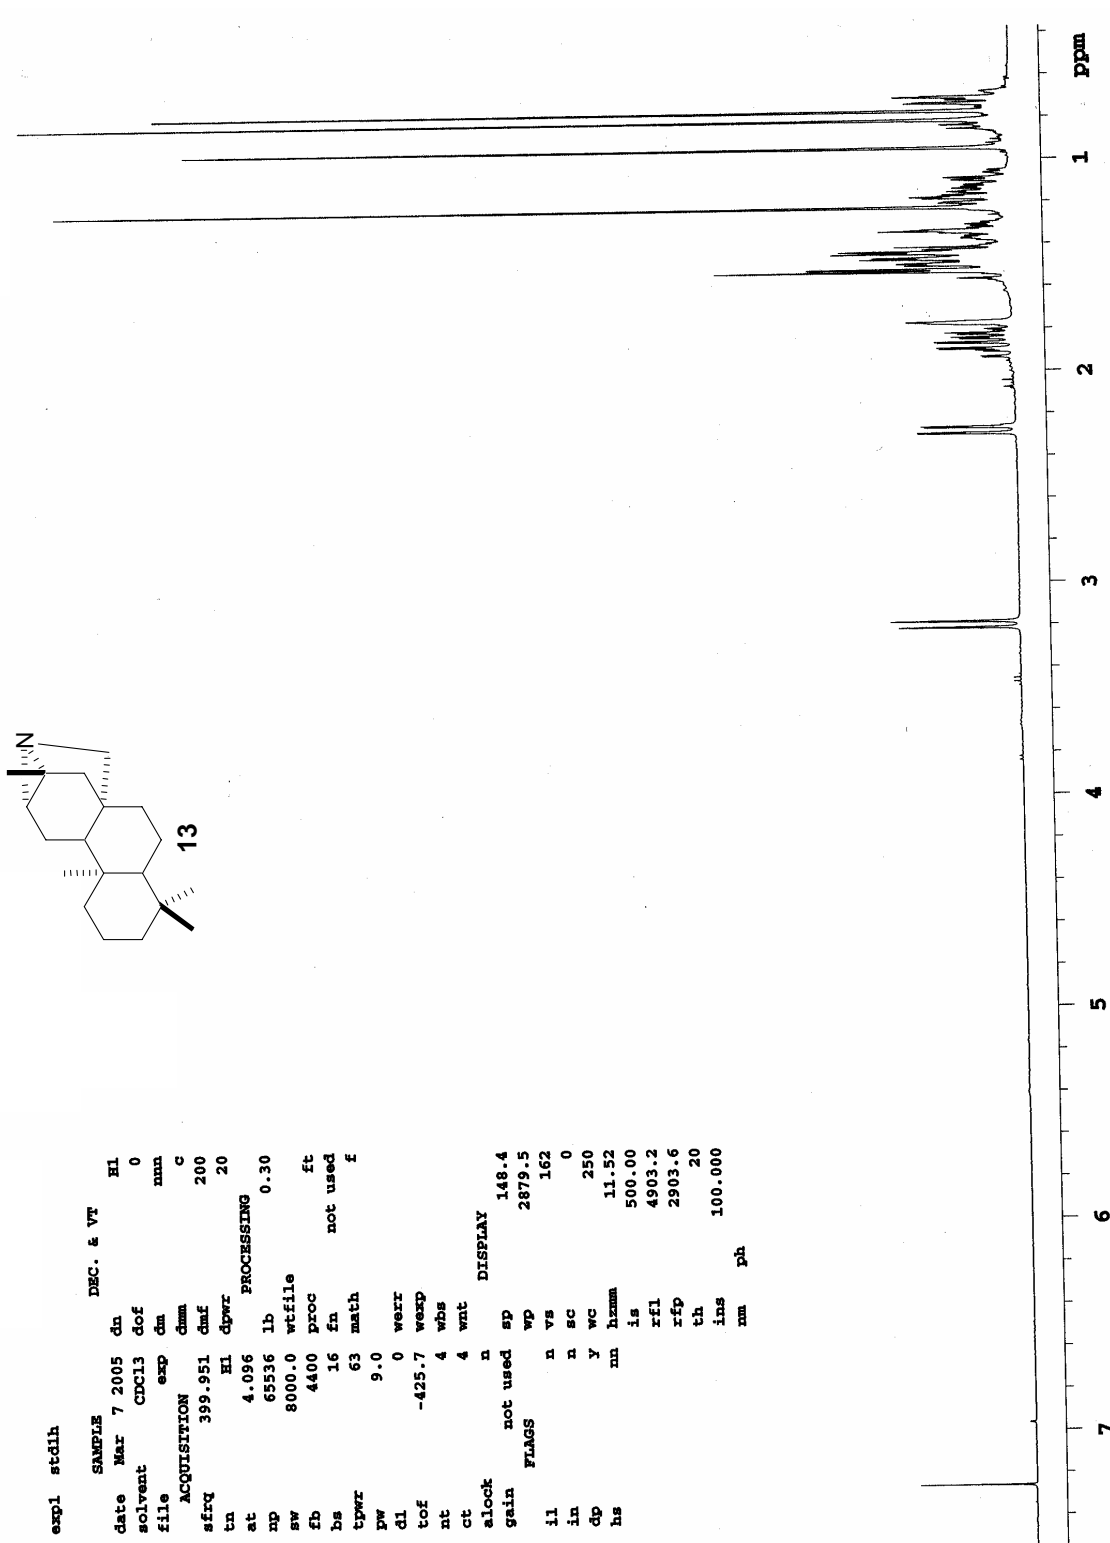

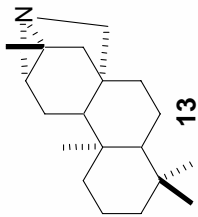

| INDEX | FREQUENCY (PPM) | FREQUENCY (Hz) | HEIGHT |
|-------|-----------------|----------------|--------|
| 1     | 77.319          | 7775.717       | 115.5  |
| 2     | 77.000          | 7743.673       | 117.0  |
| 3     | 76.681          | 7711.628       | 111.9  |
| 4     | 56.160          | 5647.814       | 147.5  |
| 5     | 55.249          | 5556.259       | 173.7  |
| 6     | 51.630          | 5192.325       | 150.9  |
| 7     | 48.634          | 4890.955       | 149.8  |
| 8     | 43.695          | 4394.266       | 37.2   |
| 9     | 41.927          | 4216.496       | 190.1  |
| 10    | 40.941          | 4117.311       | 138.3  |
| 11    | 40.342          | 4057.037       | 53.3   |
| 12    | 39.128          | 3934.963       | 166.1  |
| 13    | 37.808          | 3802.207       | 86.6   |
| 14    | 35.312          | 3551.192       | 138.2  |
| 15    | 33.423          | 3361.215       | 165.7  |
| 16    | 32.854          | 3303.993       | 73.5   |
| 17    | 21.747          | 2187.015       | 166.2  |
| 18    | 20.578          | 2069.519       | 127.3  |
| 19    | 20.161          | 2027.556       | 167.5  |
| 20    | 18.082          | 1818.504       | 156.4  |
| 21    | 18.007          | 1810.874       | 140.1  |
| 22    | 14.145          | 1422.526       | 141.5  |

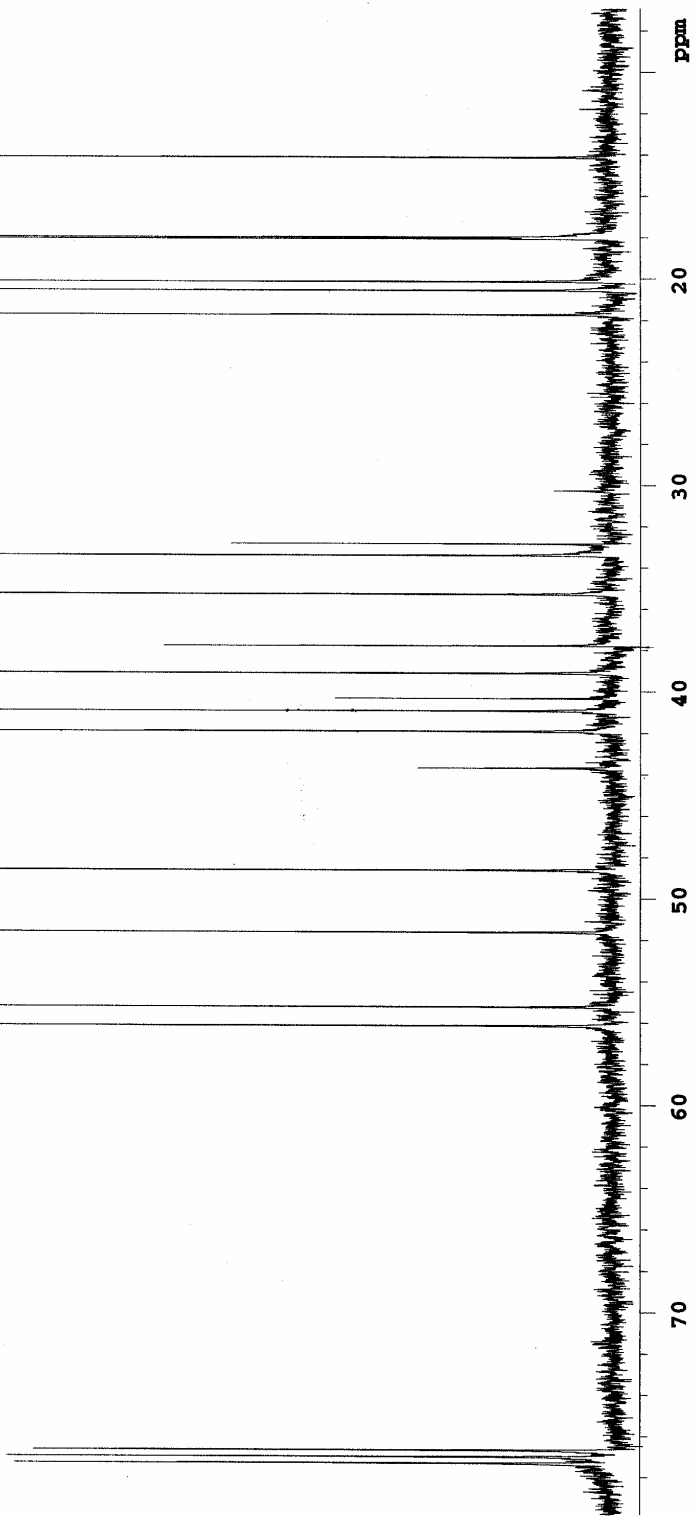

STANDARD 1H OBSERVE

```

exp1 stdih
SAMPLE
date Jan 8 2005 dn H1
solvent CDCl3 dof 0
file /export/home/~ dm nmn
data/u400/roy/isos- dnm c
tev-1h.fid dmf 200
ACQUISITION cpwr 20
sfrq 399.951
tn H1 lb 0.30
at 4.096 wfile
np 65536 proc ft
sw 8000.0 fn not used
fb 4400 math f
bs 16
tpwr 63 wezz
pw 9.0 wexp
dl 0 wbs
tof -425.7 wnt
nt 4 DISPLAY
ct 4 sp 167.9
alock n wp 2792.8
gain not used vs 162
FLAGS
il n wc 250
in n hzmm 11.17
dp y is 500.00
hs nm rfl 4903.0
rfl rfp 2903.6
th 20
ins 100.000
nm ph
    
```

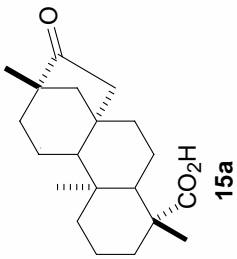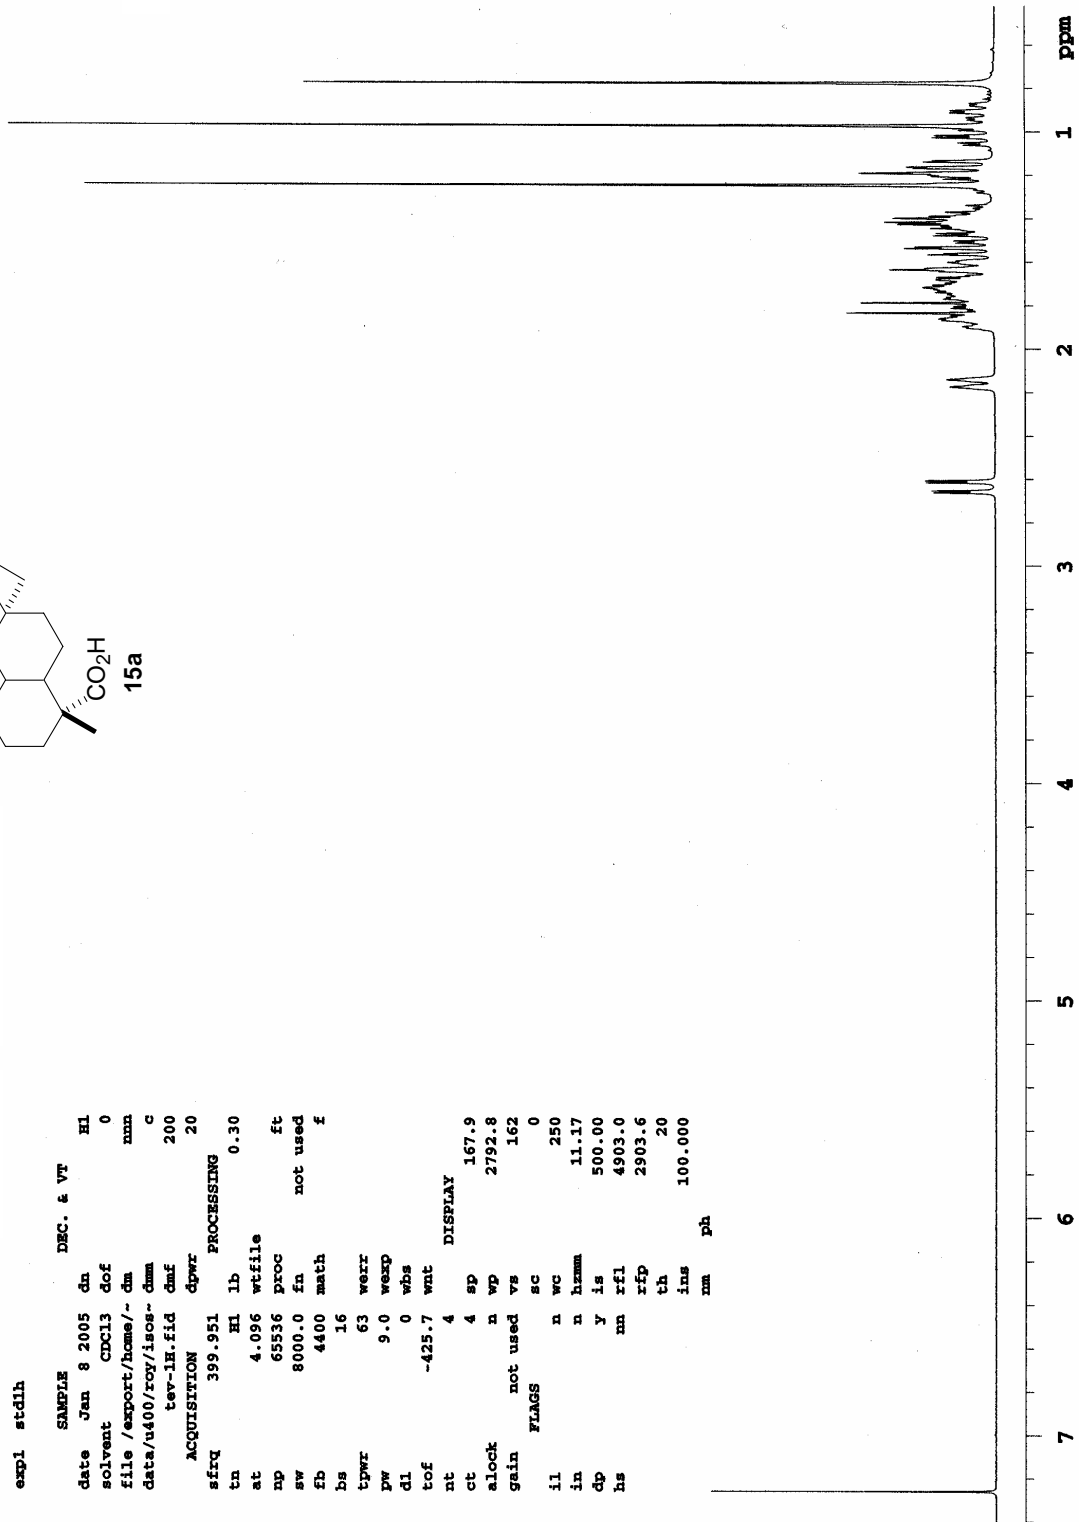

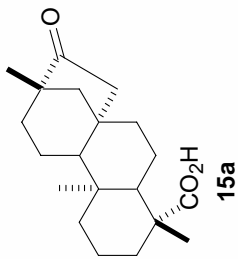

| INDEX | FREQUENCY (PPM) | FREQQ     |
|-------|-----------------|-----------|
| 1     | 222.898         | 22416.209 |
| 2     | 183.834         | 18487.714 |
| 3     | 77.319          | 7775.717  |
| 4     | 77.000          | 7743.673  |
| 5     | 76.681          | 7711.628  |
| 6     | 56.956          | 5727.925  |
| 7     | 54.657          | 5496.747  |
| 8     | 54.210          | 5451.733  |
| 9     | 48.725          | 4900.110  |
| 10    | 48.414          | 4868.829  |
| 11    | 43.627          | 4387.399  |
| 12    | 41.389          | 4162.325  |
| 13    | 39.682          | 3990.659  |
| 14    | 39.439          | 3966.244  |
| 15    | 38.149          | 3836.540  |
| 16    | 37.603          | 3781.607  |
| 17    | 37.261          | 3747.274  |
| 18    | 28.939          | 2910.304  |
| 19    | 21.580          | 2170.230  |
| 20    | 20.305          | 2042.052  |
| 21    | 19.827          | 1993.985  |
| 22    | 18.811          | 1891.748  |
| 23    | 13.273          | 1334.786  |

40.7  
49.2  
111.3  
111.7  
107.2  
90.3  
81.9  
63.5  
70.7  
59.5  
66.5  
64.5  
64.1  
76.5  
70.5  
62.6  
67.3  
78.0  
58.5  
60.4  
83.4  
57.4  
69.8

STANDARD 1H OBSERVE

```

exp1 stdih
SAMPLE
date Mar 13 2004   dn
solvent CDC13     dof 0
file          exp  cm
ACQUISITION  cmm  c
sfrq 399.951    cmf 200
tn    HI        dpwr 20
at    4.096     PROCESSING
np    65536    lb    0.30
sw    8000.0   wtfile
fb    4400    proc   ft
bs    16      fn    not used
tpwr  63      math   f
pw    9.6
di    0       werr
tof  -425.7   wexp
nt    8       wbs
ct    8       wnt
alock n
gain  not used sp 101.8
FLAGS n vs 2902.7
il    n vs 162
in    n sc 0
cp    y wc 250
hs    nn   hzmm 11.61
           is 500.00
           rfl 4903.2
           rfp 2903.6
           th 15
           ins 100.000
           nm ph
  
```

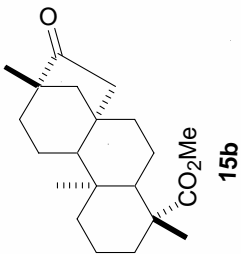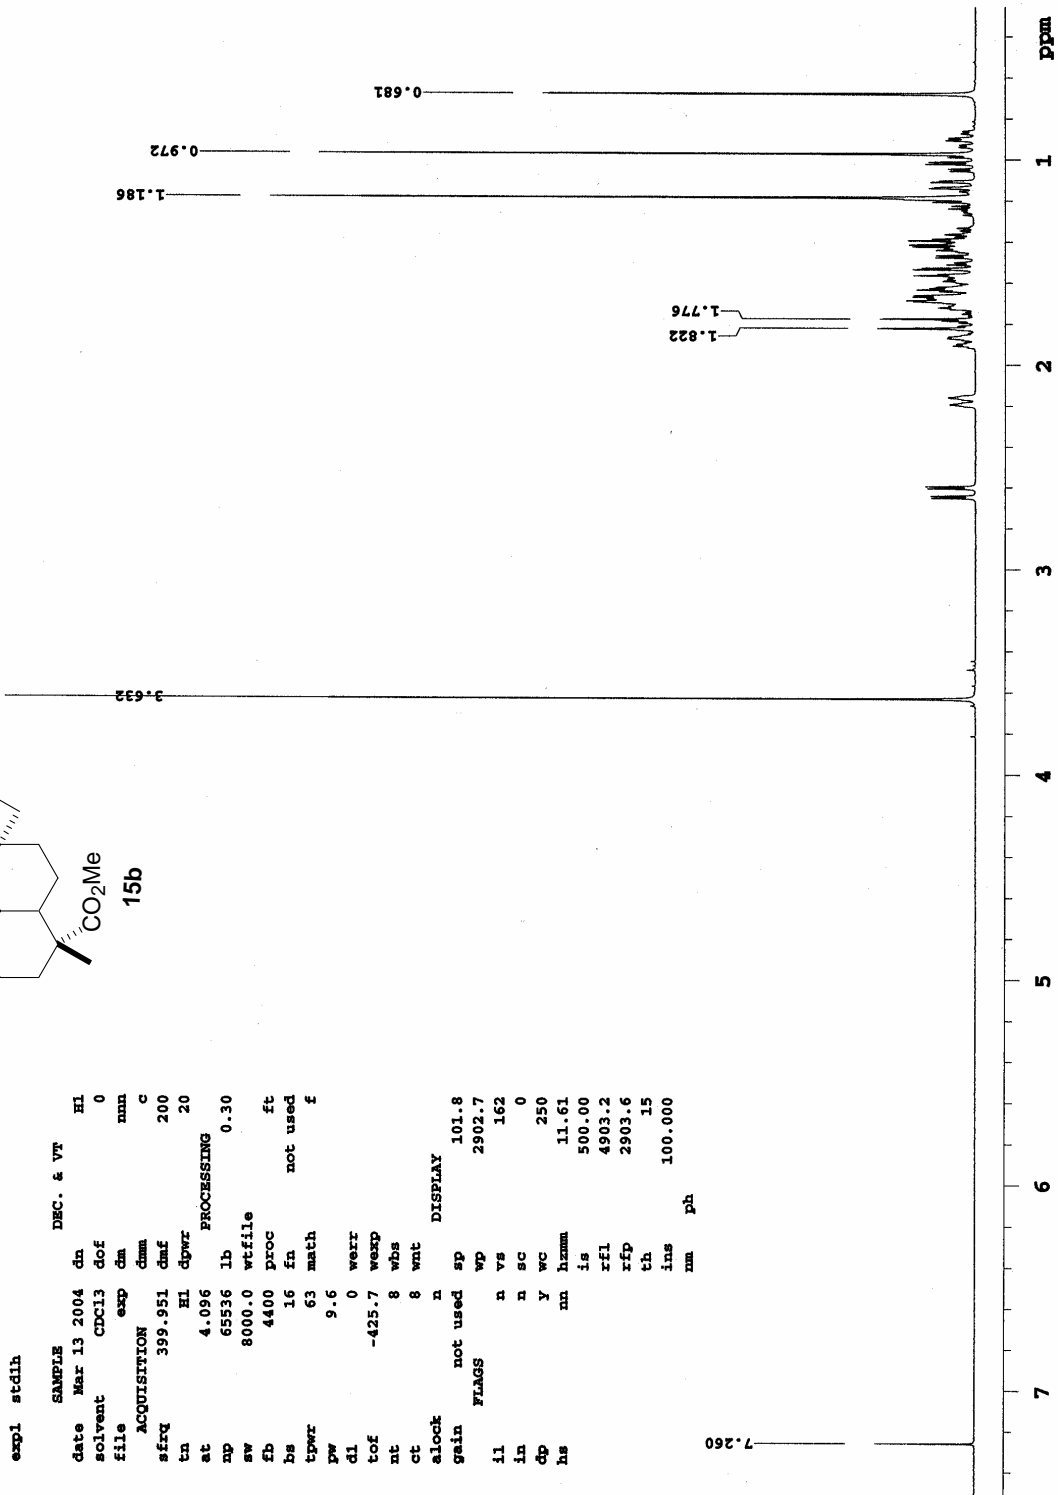

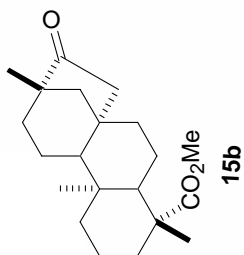

15b

| INDEX | FREQUENCY (PPM) | FREQUENCY (Hz) | HEIGHT |
|-------|-----------------|----------------|--------|
| 1     | 222.601         | 27969.490      | 7.5    |
| 2     | 177.855         | 22347.272      | 5.3    |
| 3     | 77.256          | 9707.177       | 36.2   |
| 4     | 77.000          | 9674.955       | 37.4   |
| 5     | 76.751          | 9643.654       | 35.6   |
| 6     | 57.005          | 7162.587       | 22.9   |
| 7     | 54.668          | 6868.910       | 23.2   |
| 8     | 54.283          | 6815.514       | 22.1   |
| 9     | 51.231          | 6437.139       | 14.1   |
| 10    | 48.674          | 6115.843       | 10.1   |
| 11    | 48.425          | 6084.542       | 26.4   |
| 12    | 43.728          | 5494.426       | 11.3   |
| 13    | 41.428          | 5205.352       | 22.4   |
| 14    | 39.757          | 4995.451       | 24.6   |
| 15    | 39.398          | 4950.340       | 13.3   |
| 16    | 37.889          | 4760.693       | 26.9   |
| 17    | 37.259          | 4681.520       | 25.6   |
| 18    | 28.811          | 3620.046       | 25.1   |
| 19    | 21.652          | 2720.602       | 19.7   |
| 20    | 20.268          | 2546.605       | 23.9   |
| 21    | 19.813          | 2489.526       | 20.1   |
| 22    | 18.890          | 2373.529       | 22.1   |
| 23    | 13.117          | 1648.081       | 23.0   |

ppm

20

40

60

80

100

120

140

160

180

200

220



STANDARD IR OBSERVE

```

exp1 stdih
SAMPLE
date Aug 16 2004 Gm DEC. & VT H1
solvent CDCl3 dof 0
file exp Gm mmn c
ACQUISITION
sfrq 399.951 dmf 200 c
tn H1 dprw 20
at 4.096 PROCESSING
np 65836 lb 0.30
sw 8000.0 wtfile
fb 4400 proc ft
bs 16 fn not used
tpwr 63 math f
pw 10.1
dl 0 werr
tof -425.7 weap
nt 5 wbs
ct 5 wnt
alock n DISPLAY
gain not used sp 210.4
FLAGS wp 1031.8
il n vs 162
in n sc 0
dp y wc 250
hs nm hnm 4.13
is 500.00
rfl 4903.2
rfd 2903.6
th 20
ins 100.000
nm ph
    
```

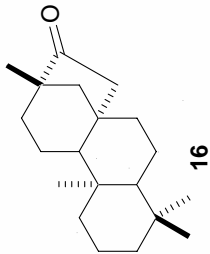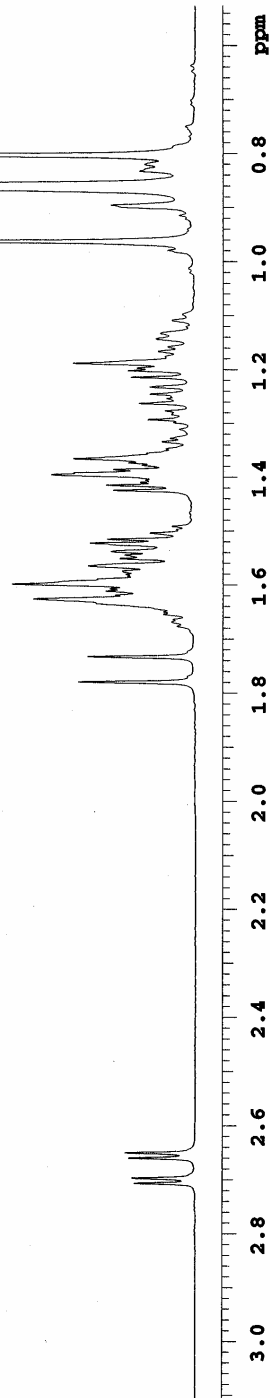

| INDEX | FREQUENCY (PPM) | FREQUENCY (HZ) | HEIGHT |
|-------|-----------------|----------------|--------|
| 1     | 223.027         | 22429.179      | 26.0   |
| 2     | 77.319          | 7775.717       | 88.4   |
| 3     | 77.000          | 7743.673       | 90.0   |
| 4     | 76.681          | 7711.628       | 87.5   |
| 5     | 56.289          | 5660.784       | 85.7   |
| 6     | 55.378          | 5569.229       | 91.2   |
| 7     | 54.551          | 5486.066       | 87.0   |
| 8     | 48.801          | 4907.740       | 88.6   |
| 9     | 48.732          | 4900.873       | 61.6   |
| 10    | 41.859          | 4209.629       | 83.2   |
| 11    | 41.290          | 4152.407       | 94.8   |
| 12    | 39.436          | 3963.955       | 52.1   |
| 13    | 39.401          | 3962.429       | 90.6   |
| 14    | 37.603          | 3781.607       | 40.8   |
| 15    | 37.368          | 3757.955       | 86.9   |
| 16    | 33.632          | 3380.289       | 86.5   |
| 17    | 33.142          | 3332.985       | 57.9   |
| 18    | 21.823          | 2194.645       | 89.3   |
| 19    | 20.063          | 2017.637       | 97.4   |
| 20    | 19.987          | 2010.008       | 84.6   |
| 21    | 19.888          | 2000.089       | 75.8   |
| 22    | 18.325          | 1842.919       | 89.3   |
| 23    | 14.926          | 1501.111       | 82.9   |

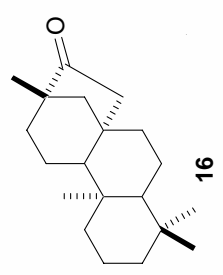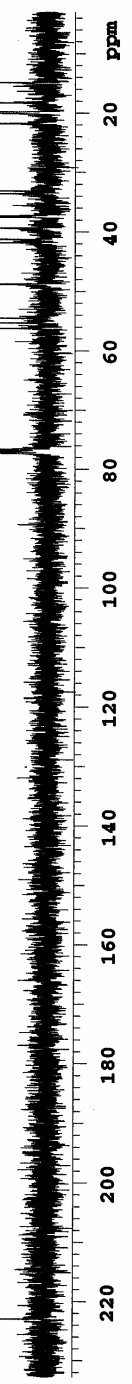

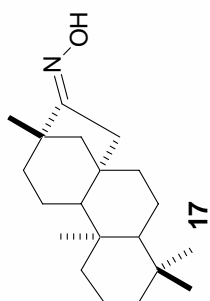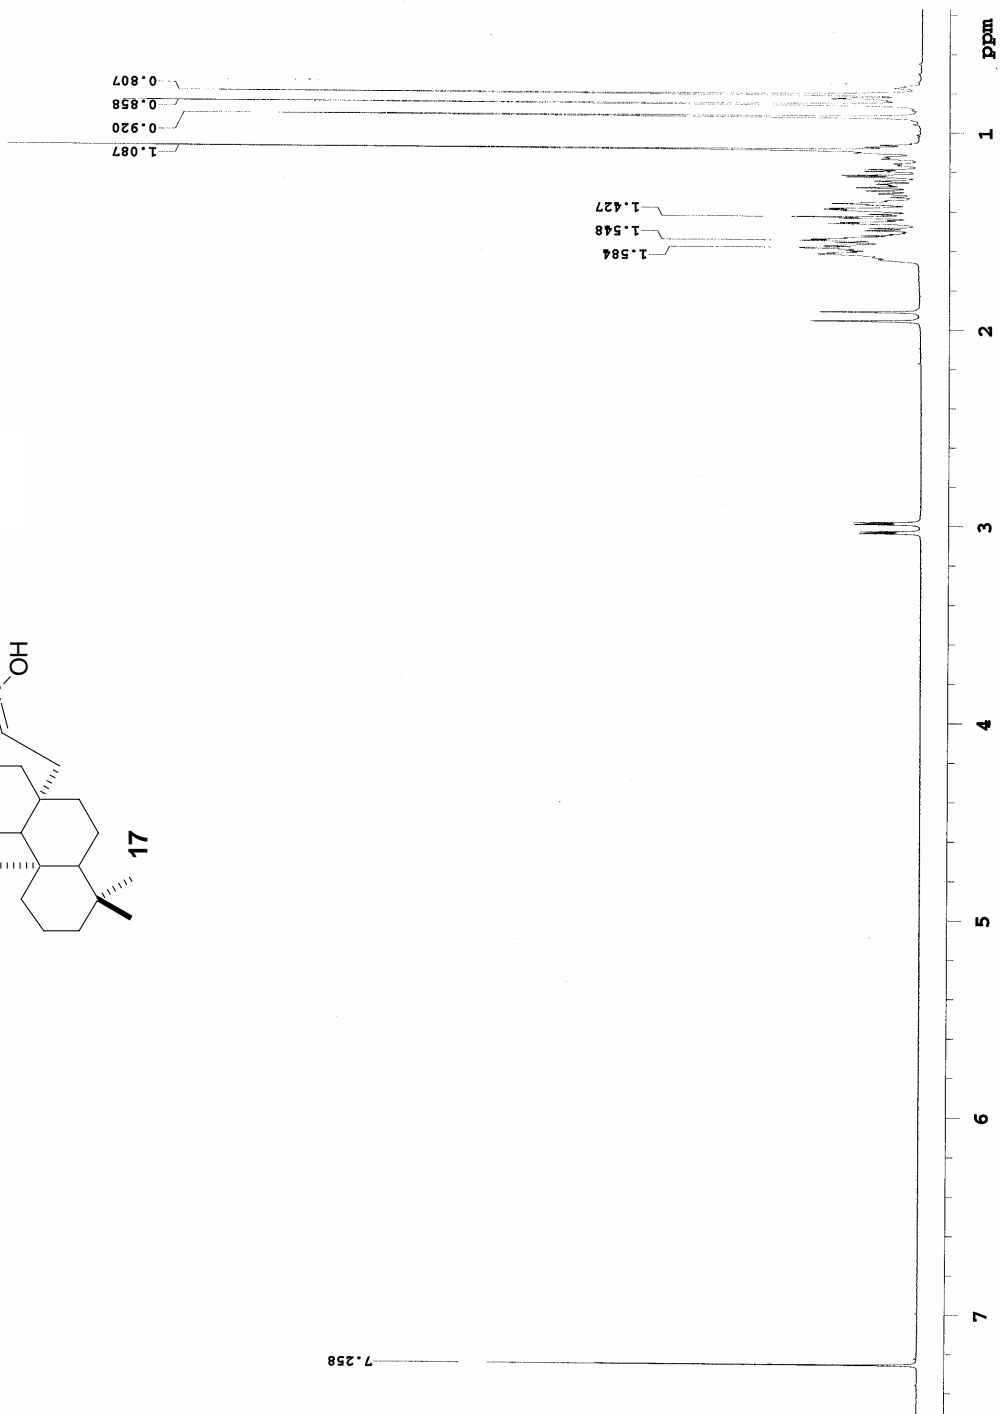

| INDEX | FREQUENCY (PPM) | FREQUENCY (Hz) | HEIGHT |
|-------|-----------------|----------------|--------|
| 1     | 170.675         | 21445.065      | 6.9    |
| 2     | 77.256          | 9707.177       | 41.5   |
| 3     | 77.000          | 9674.955       | 41.2   |
| 4     | 76.751          | 9643.654       | 38.7   |
| 5     | 56.580          | 7109.191       | 19.4   |
| 6     | 56.360          | 7081.572       | 21.5   |
| 7     | 55.685          | 6986.749       | 20.2   |
| 8     | 43.772          | 5499.950       | 16.0   |
| 9     | 41.911          | 5266.112       | 18.1   |
| 10    | 40.666          | 5109.607       | 17.3   |
| 11    | 40.563          | 5096.719       | 14.9   |
| 12    | 39.508          | 4964.149       | 19.7   |
| 13    | 39.457          | 4957.705       | 16.0   |
| 14    | 37.647          | 4730.312       | 11.8   |
| 15    | 37.039          | 4653.901       | 17.5   |
| 16    | 33.639          | 4226.734       | 17.7   |
| 17    | 33.141          | 4164.132       | 15.0   |
| 18    | 22.158          | 2784.124       | 17.8   |
| 19    | 21.821          | 2741.776       | 17.7   |
| 20    | 20.055          | 2519.907       | 17.5   |
| 21    | 19.997          | 2512.542       | 17.4   |
| 22    | 18.355          | 2306.323       | 14.5   |
| 23    | 14.912          | 1873.633       | 15.4   |

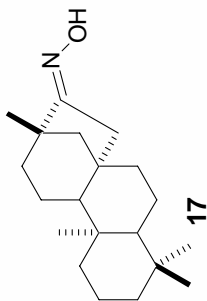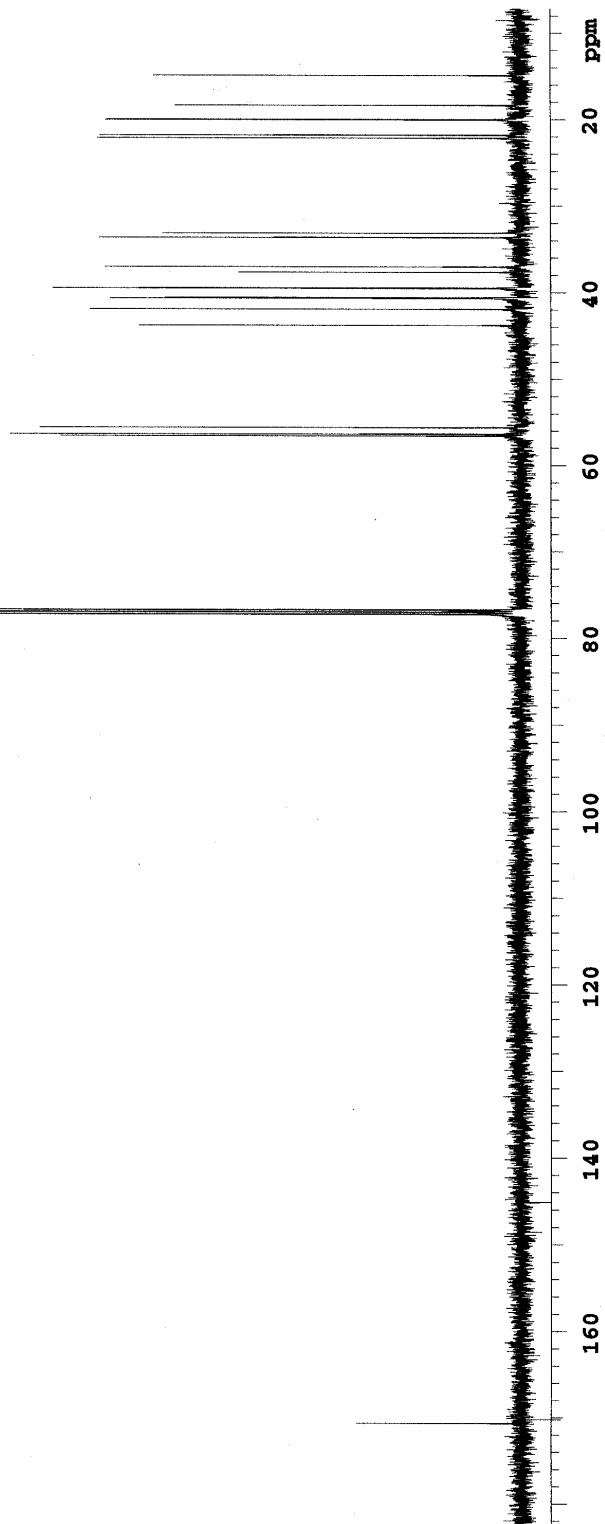

STANDARD IH OBSER

expl stdih

|                  |           |          |
|------------------|-----------|----------|
| SAMPLE           | DEC. & VT | HI       |
| date Jul 10 2004 | dn        | 0        |
| solvent CDCl3    | dof       | mm       |
| file             | exp dn    | c        |
| ACQUISITION      | chma      | 200      |
| sfrq 399.951     | dmf       | 20       |
| tn               | HI        | PROSSING |
| at 4.096         | dpwr      | 0.30     |
| ap 65536         | lb        |          |
| sw 8000.0        | wtfile    | ft       |
| fb 4400          | proc      | not used |
| bs 16            | fn        | f        |
| tpwr 63          | math      |          |
| pw 10.1          |           |          |
| dl 0             | verz      |          |
| tof -425.7       | wexp      |          |
| nt 6             | wbs       |          |
| ct 6             | wat       |          |
| alock            | n         | DISPLAY  |
| gain not used    | sp        | 149.4    |
| FLAGS            | wp        | 2823.6   |
| il               | n vs      | 162      |
| in               | n sc      | 0        |
| dp               | y wc      | 250      |
| hs               | nn hzmm   | 11.29    |
|                  | is        | 500.00   |
|                  | xfl       | 4903.2   |
|                  | rfp       | 2903.6   |
|                  | th        | 20       |
|                  | ins       | 100.000  |
|                  | nn        | pb       |

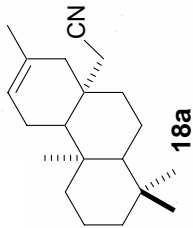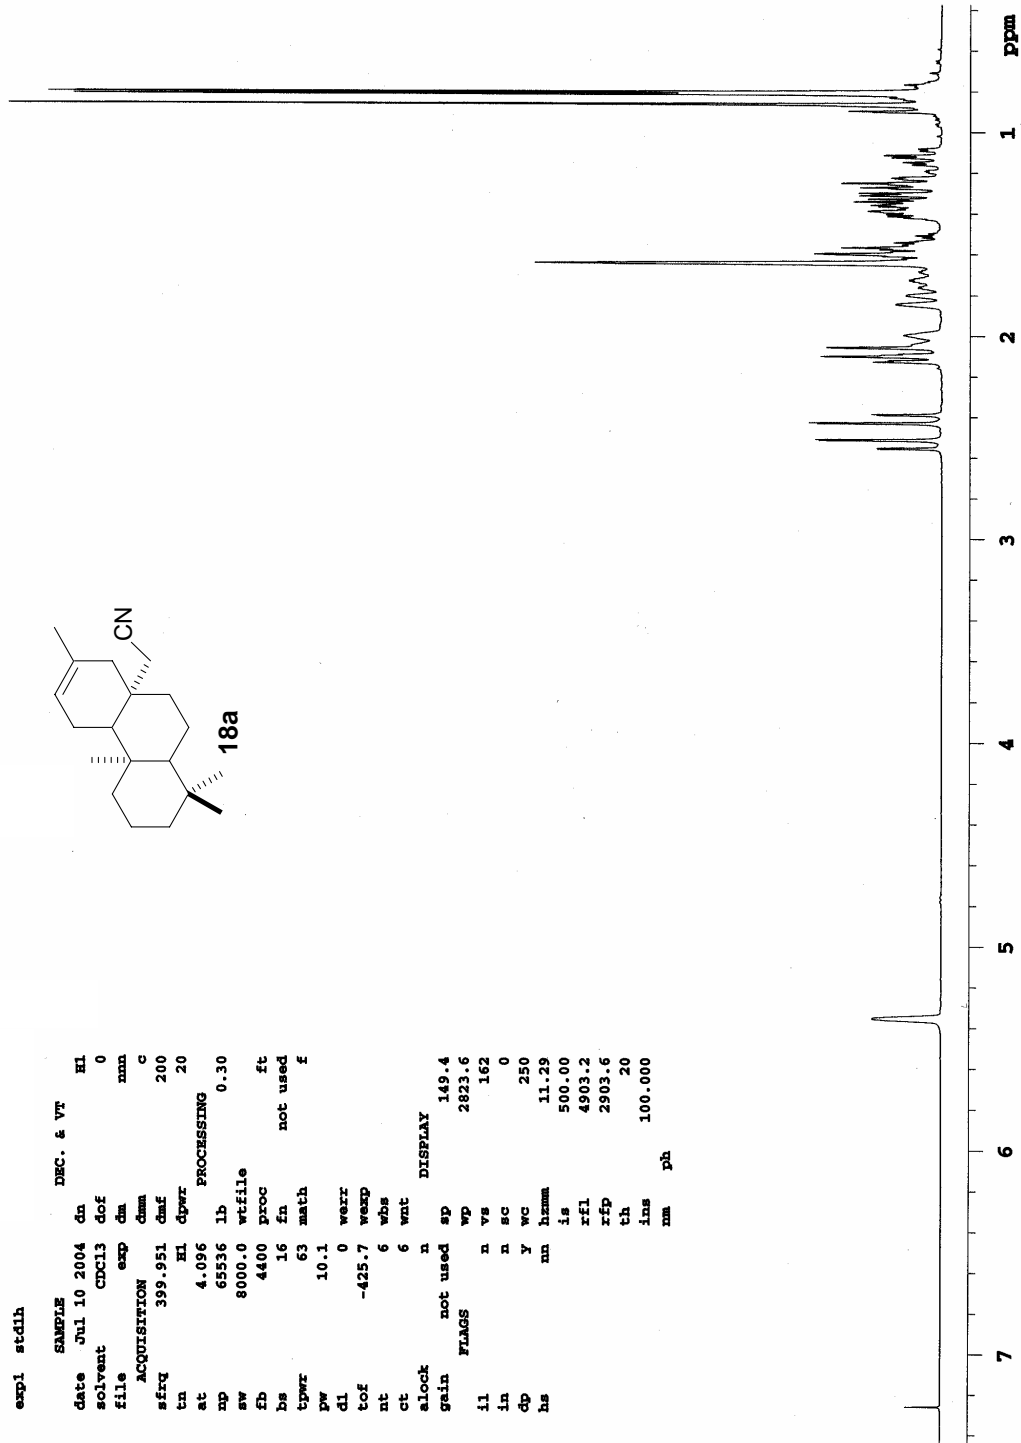

| INDEX | FREQUENCY (PPM) | FREQUENCY (Hz) | HEIGHT |
|-------|-----------------|----------------|--------|
| 1     | 131.092         | 13183.597      | 124.8  |
| 2     | 119.781         | 12046.020      | 324.5  |
| 3     | 119.136         | 11981.166      | 52.6   |
| 4     | 77.319          | 7775.717       | 97.4   |
| 5     | 77.000          | 7743.673       | 100.0  |
| 6     | 76.681          | 7711.628       | 100.9  |
| 7     | 56.554          | 5687.488       | 295.5  |
| 8     | 52.313          | 5260.992       | 297.8  |
| 9     | 45.865          | 4612.474       | 298.1  |
| 10    | 41.624          | 4185.978       | 294.6  |
| 11    | 39.370          | 3959.378       | 280.9  |
| 12    | 38.862          | 3908.259       | 290.7  |
| 13    | 36.867          | 3707.600       | 147.3  |
| 14    | 35.168          | 3536.696       | 117.4  |
| 15    | 33.263          | 3345.193       | 296.8  |
| 16    | 33.104          | 3329.171       | 186.8  |
| 17    | 23.310          | 2344.186       | 229.3  |
| 18    | 22.012          | 2213.719       | 243.1  |
| 19    | 21.534          | 2165.652       | 268.7  |
| 20    | 20.267          | 2038.238       | 289.1  |
| 21    | 18.249          | 1835.289       | 331.2  |
| 22    | 18.227          | 1833.001       | 310.0  |
| 23    | 15.574          | 1546.127       | 226.4  |

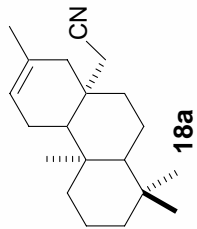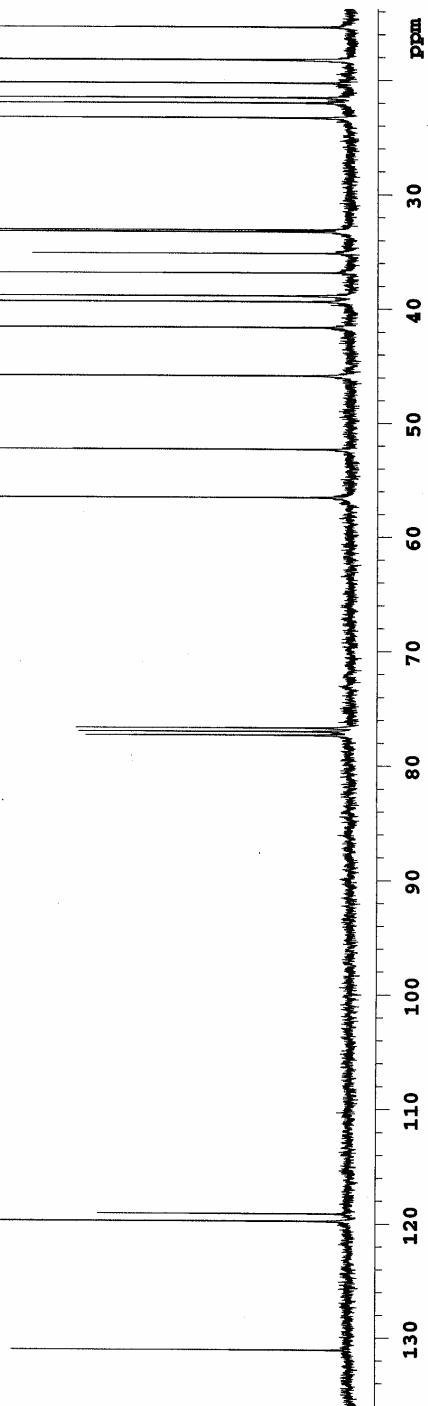

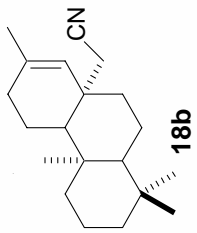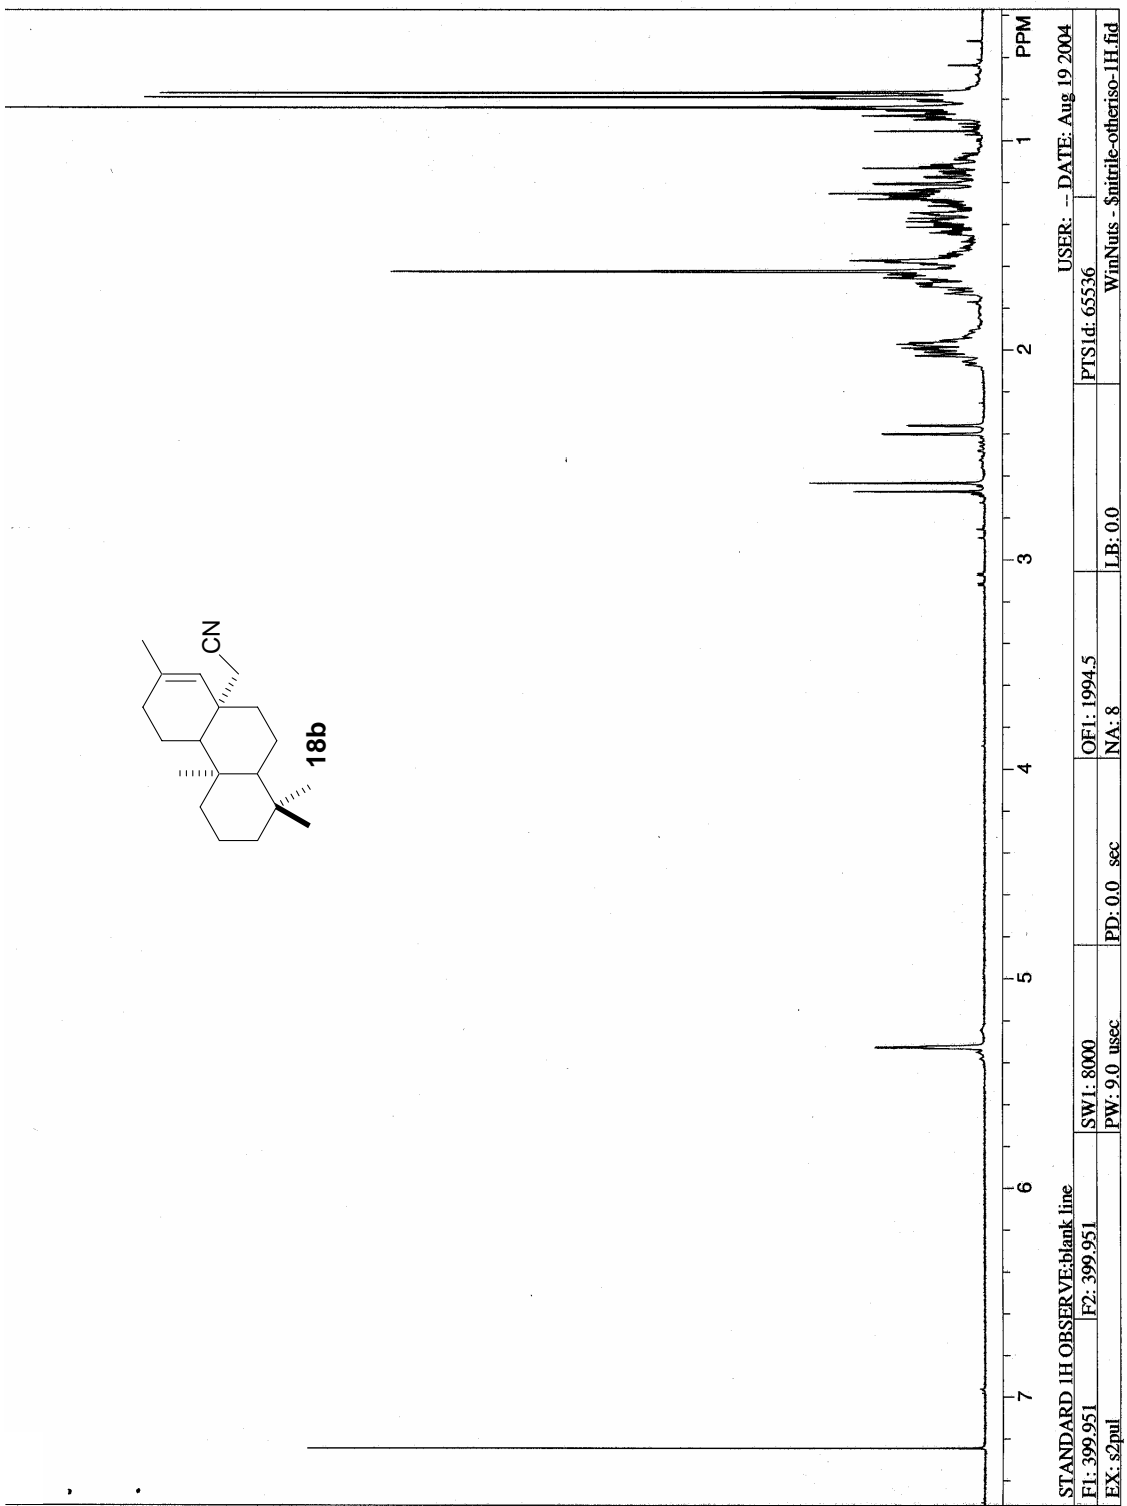

|                                  |                                     |
|----------------------------------|-------------------------------------|
| STANDARD: JH OBSERVE: blank line | USER: -- DATE: Aug 19 2004          |
| F1: 399.951                      | PTS id: 65536                       |
| EX: s2pul                        | WinNuts - \$nitrite-orthoiso-1H.fid |
| SW1: 8000                        | OF1: 1994.5                         |
| PW: 9.0 usec                     | NA: 8                               |
| PD: 0.0 sec                      | LB: 0.0                             |

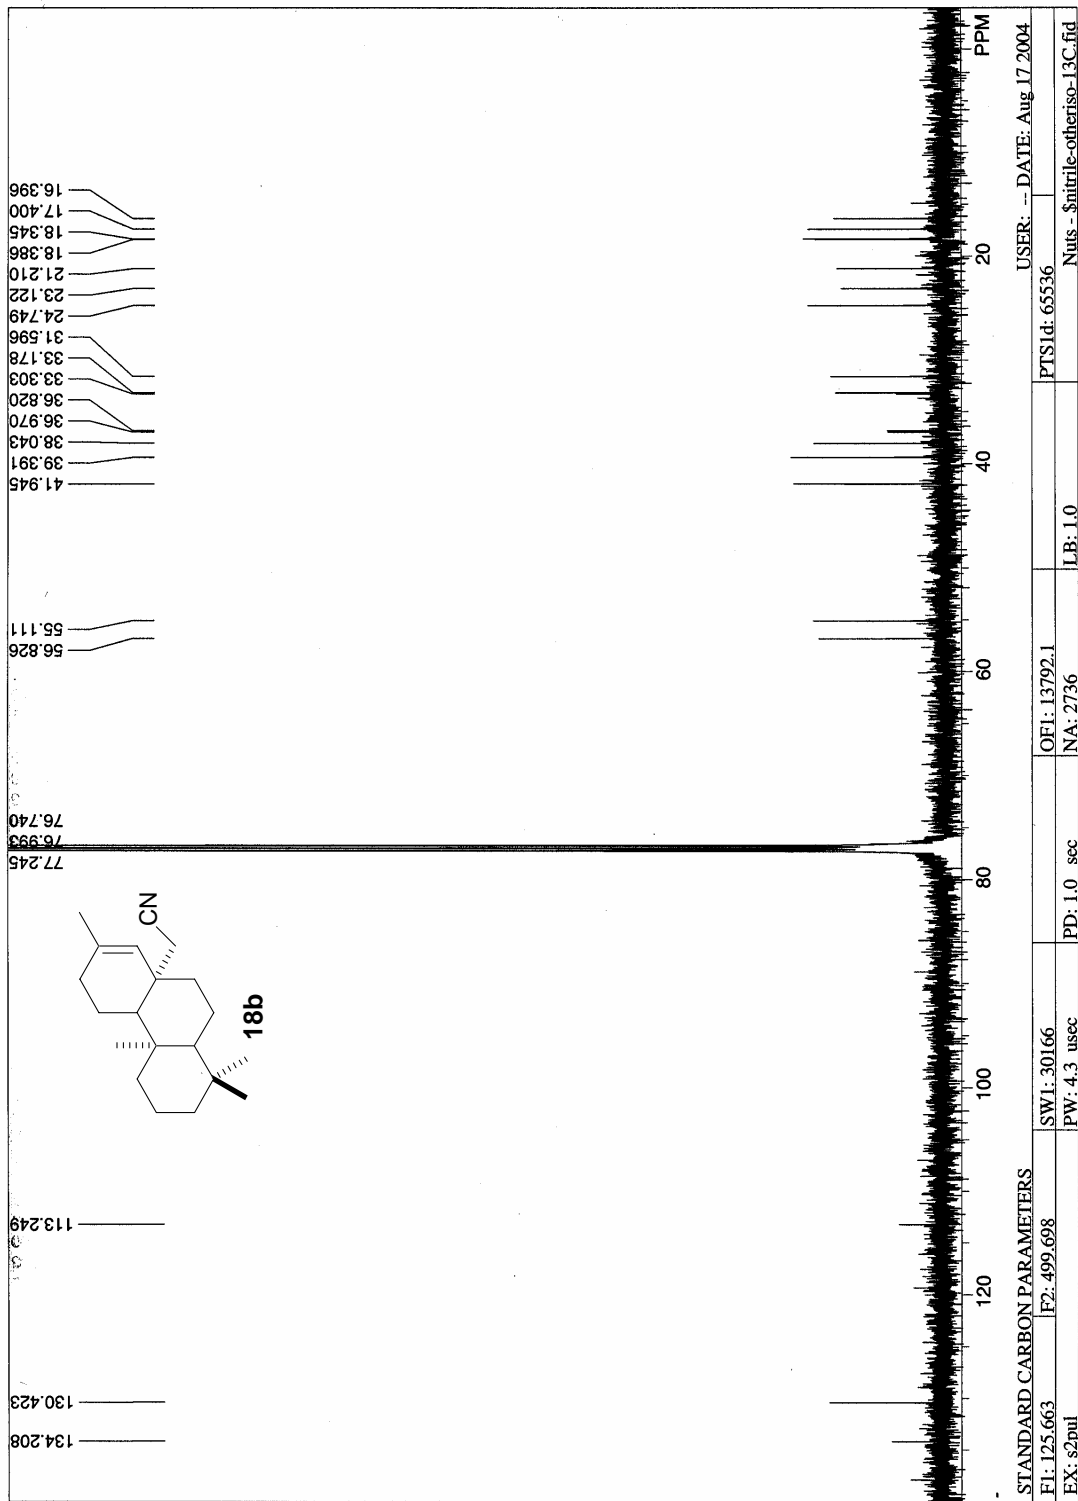



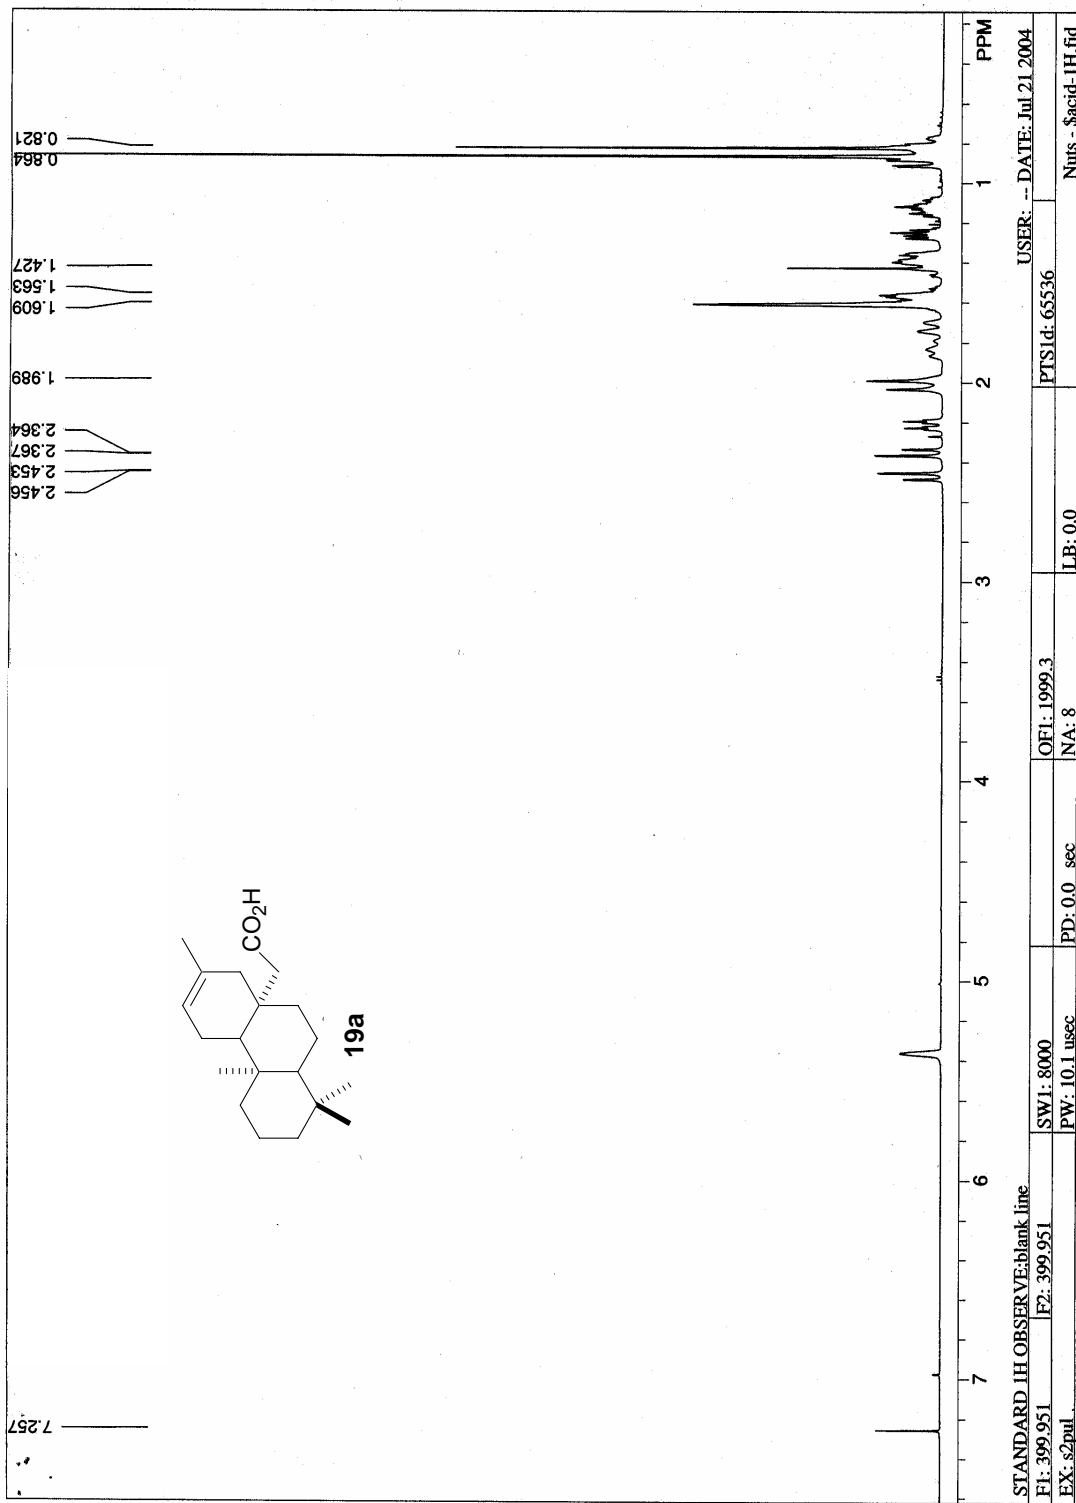

| INDEX | FREQUENCY (PPM) | FREQUENCY (Hz) | HEIGHT |
|-------|-----------------|----------------|--------|
| 1     | 180.132         | 18115.388      | 170.0  |
| 2     | 131.745         | 13249.212      | 120.6  |
| 3     | 119.622         | 12029.997      | 228.2  |
| 4     | 77.311          | 7774.954       | 72.0   |
| 5     | 77.000          | 7743.673       | 72.1   |
| 6     | 76.681          | 7711.628       | 75.4   |
| 7     | 56.987          | 5730.977       | 208.7  |
| 8     | 54.157          | 5446.392       | 235.3  |
| 9     | 45.250          | 4550.674       | 149.4  |
| 10    | 41.806          | 4204.289       | 181.3  |
| 11    | 39.545          | 3976.926       | 197.6  |
| 12    | 38.824          | 3904.444       | 158.7  |
| 13    | 37.110          | 3732.015       | 169.3  |
| 14    | 36.085          | 3625.963       | 128.5  |
| 15    | 35.152          | 3535.170       | 139.0  |
| 16    | 33.352          | 3358.163       | 209.8  |
| 17    | 33.172          | 3336.037       | 169.0  |
| 18    | 23.363          | 2349.526       | 184.0  |
| 19    | 22.270          | 2239.659       | 157.1  |
| 20    | 21.633          | 2175.571       | 207.9  |
| 21    | 18.394          | 1849.786       | 297.8  |
| 22    | 15.480          | 1556.808       | 197.9  |

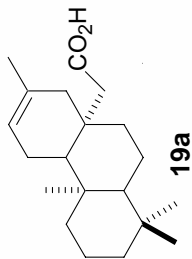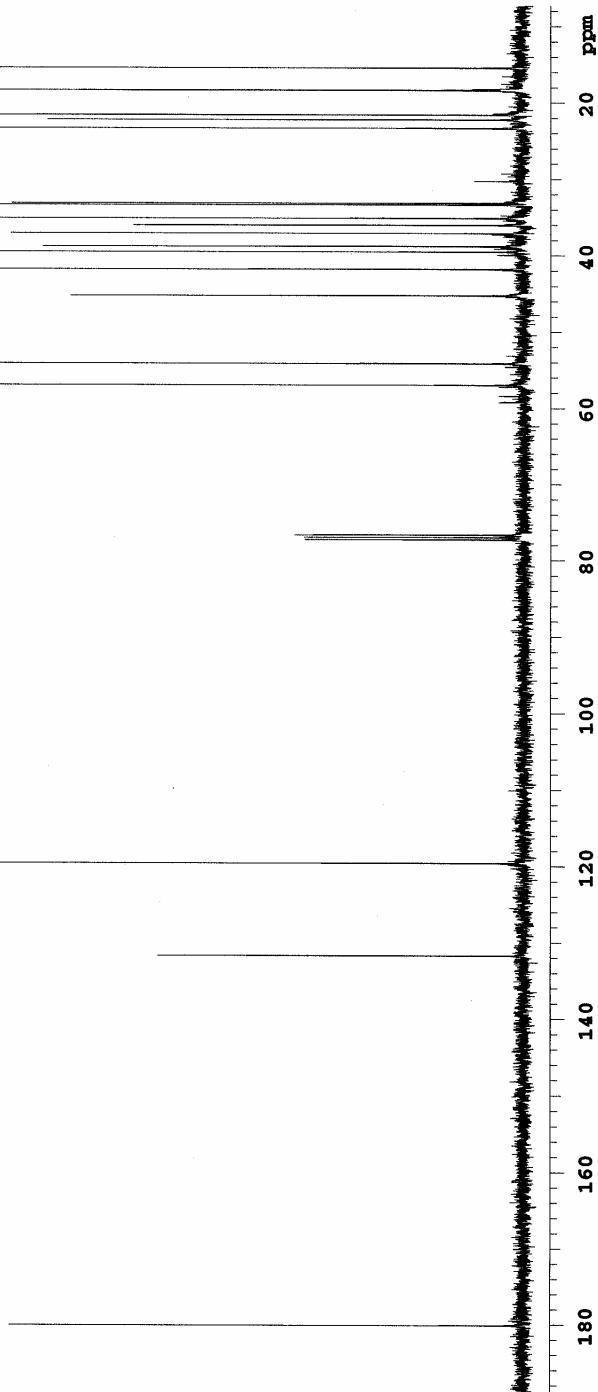

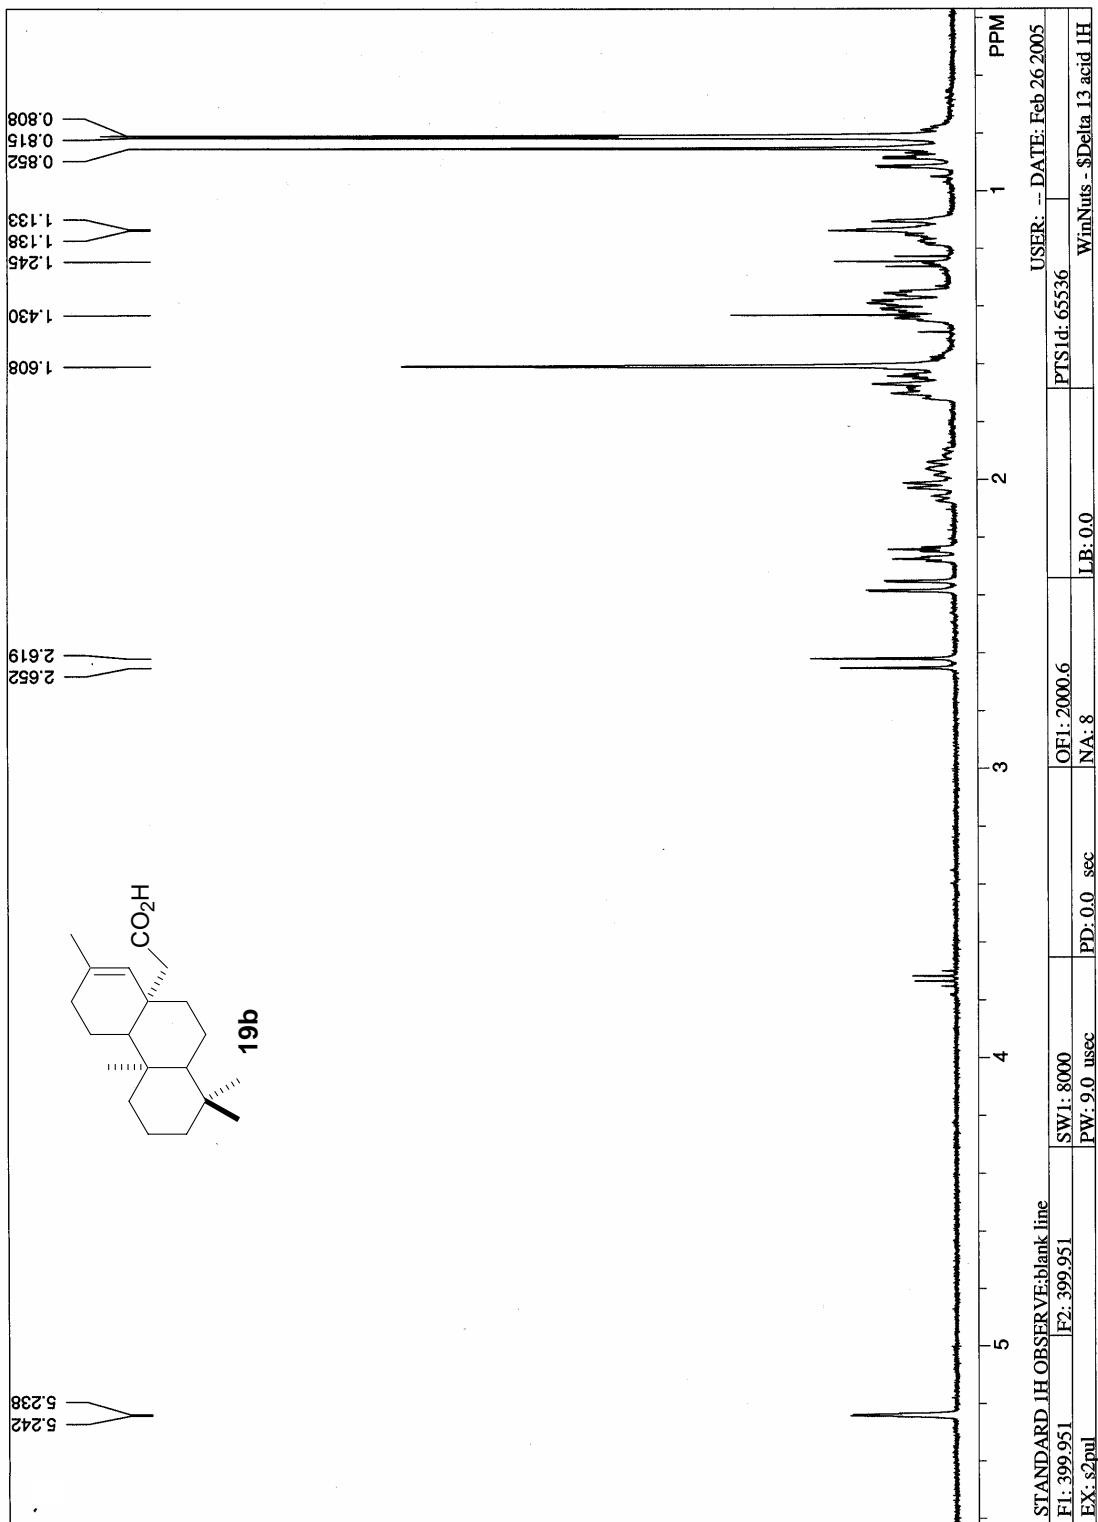

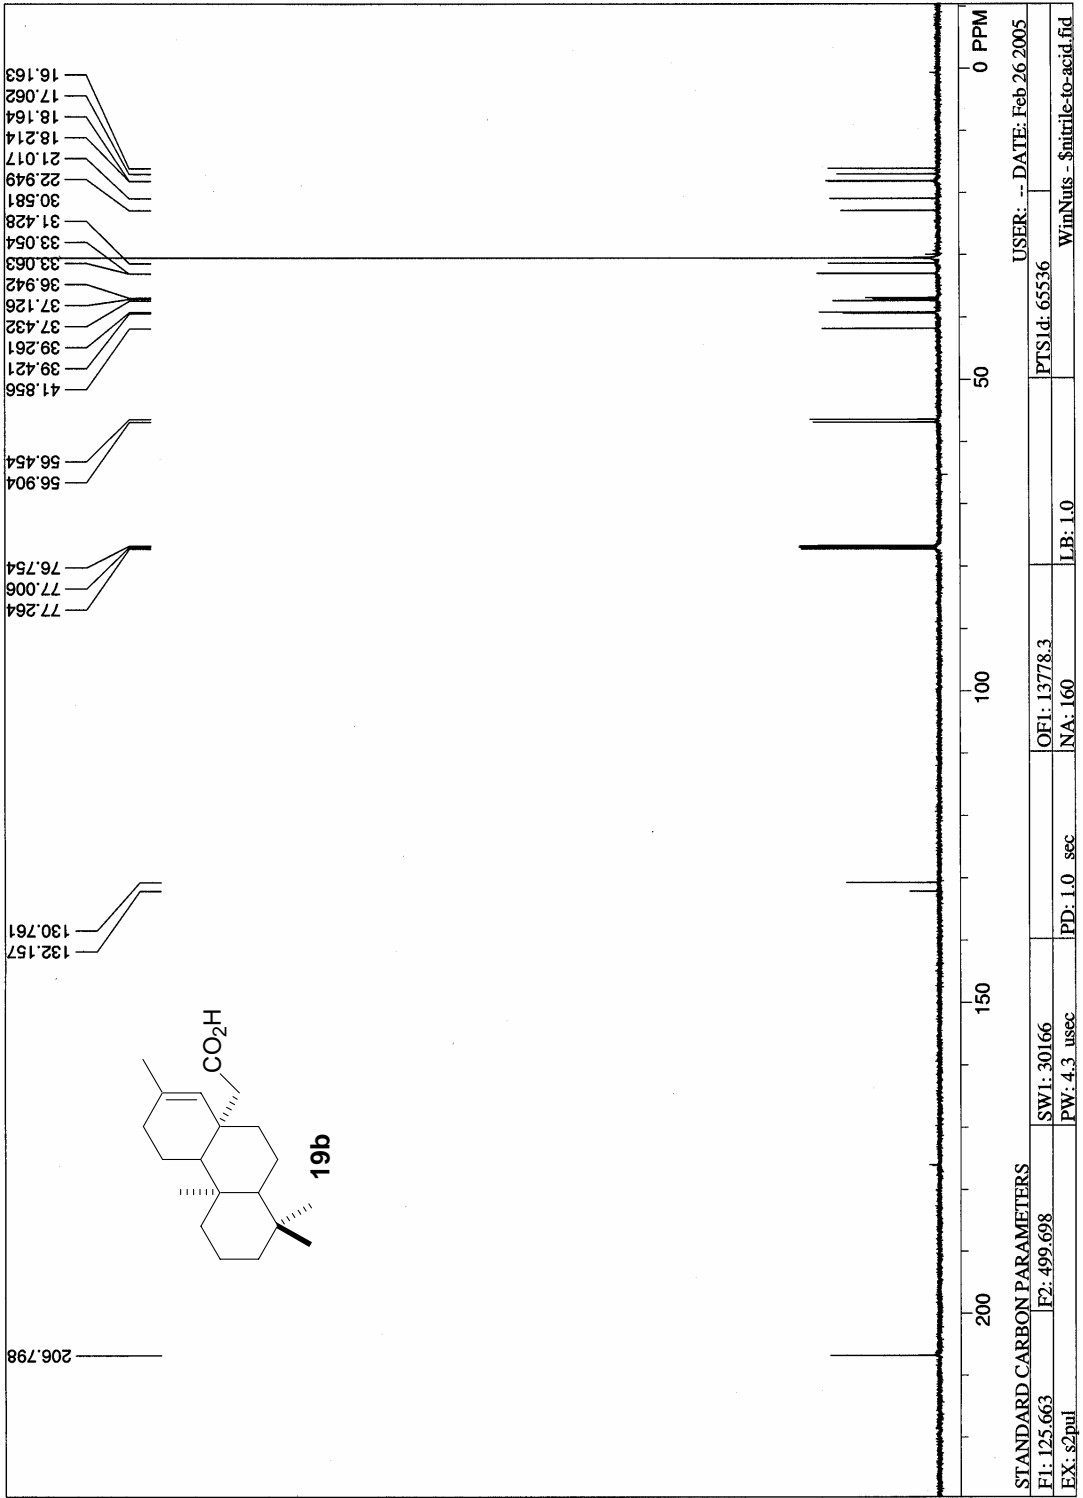

STANDARD IN OBSERVE

```

exp1 std1h
SAMPLE
date Aug 26 2004 dn
solvent CDCl3 dof
file
ACQUISITION
sfrq 399.951 dmf
tn HI dprw 20
at 4.096 PROCESSING
mp 65536 lb 0.30
sw 8000.0 wtflls
fb 4400 proc ft
bs 16 fa not used
tpwr 63 math f
pw 9.0
dl 0 weyr
tof -425.7 wexp
nt 4 whs
ct 4 wat
alock n DISPLAY
gain not used sp 232.6
FLASS wp 668.5
il n vs 203
in n sc 0
cp y wc 250
hs mn hzmm 2.67
is 500.00
rf1 4903.2
rfp 2903.6
ta 59
ins 100.000
na ph
  
```

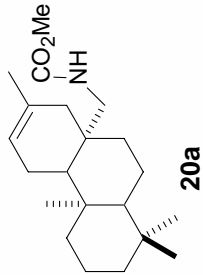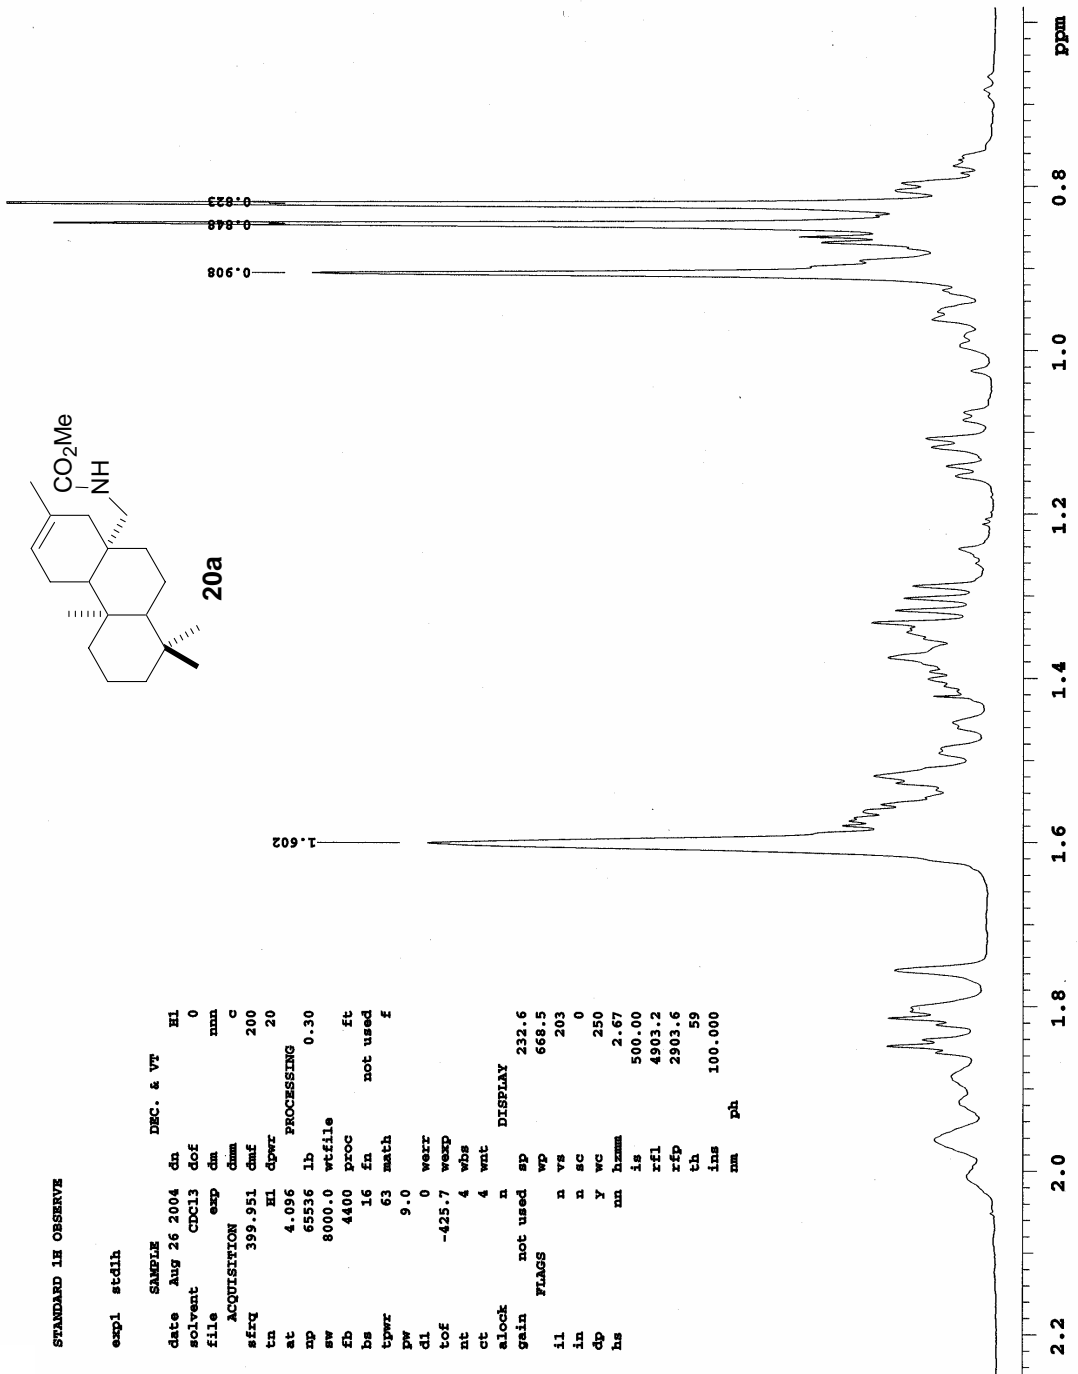

| INDEX | FREQUENCY (PPM) | FREQUENCY (Hz) | HEIGHT |
|-------|-----------------|----------------|--------|
| 1     | 157.577         | 15847.100      | 18.3   |
| 2     | 131.039         | 13178.256      | 32.7   |
| 3     | 120.813         | 12149.782      | 77.0   |
| 4     | 77.319          | 7775.717       | 97.1   |
| 5     | 77.000          | 7743.673       | 102.0  |
| 6     | 76.681          | 7711.628       | 92.5   |
| 7     | 57.138          | 5746.236       | 83.3   |
| 8     | 53.451          | 5375.436       | 118.5  |
| 9     | 52.040          | 5233.525       | 47.3   |
| 10    | 43.528          | 4377.481       | 70.8   |
| 11    | 41.897          | 4213.444       | 82.7   |
| 12    | 40.326          | 4055.511       | 68.5   |
| 13    | 39.636          | 3986.081       | 99.9   |
| 14    | 37.383          | 3759.481       | 69.4   |
| 15    | 37.140          | 3735.066       | 78.7   |
| 16    | 37.049          | 3725.911       | 54.4   |
| 17    | 33.385          | 3357.400       | 118.0  |
| 18    | 33.233          | 3342.141       | 57.9   |
| 19    | 23.507          | 2364.022       | 68.9   |
| 20    | 22.316          | 2244.237       | 69.8   |
| 21    | 21.618          | 2174.045       | 142.4  |
| 22    | 18.550          | 1863.519       | 107.9  |
| 23    | 18.500          | 1860.467       | 84.6   |
| 24    | 15.951          | 1604.111       | 123.2  |

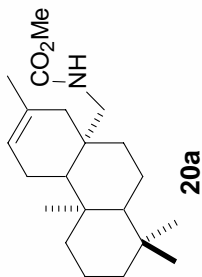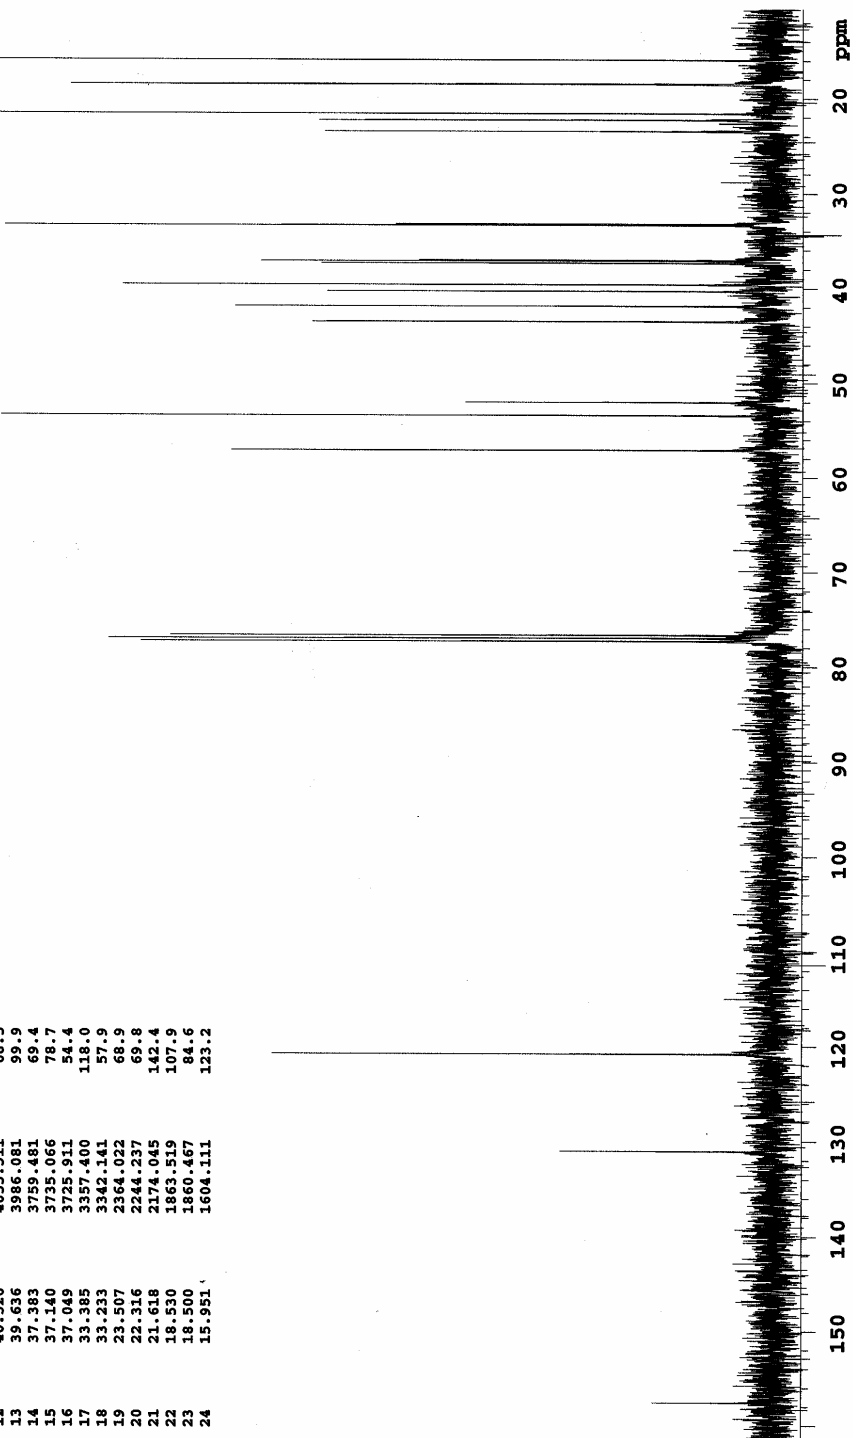

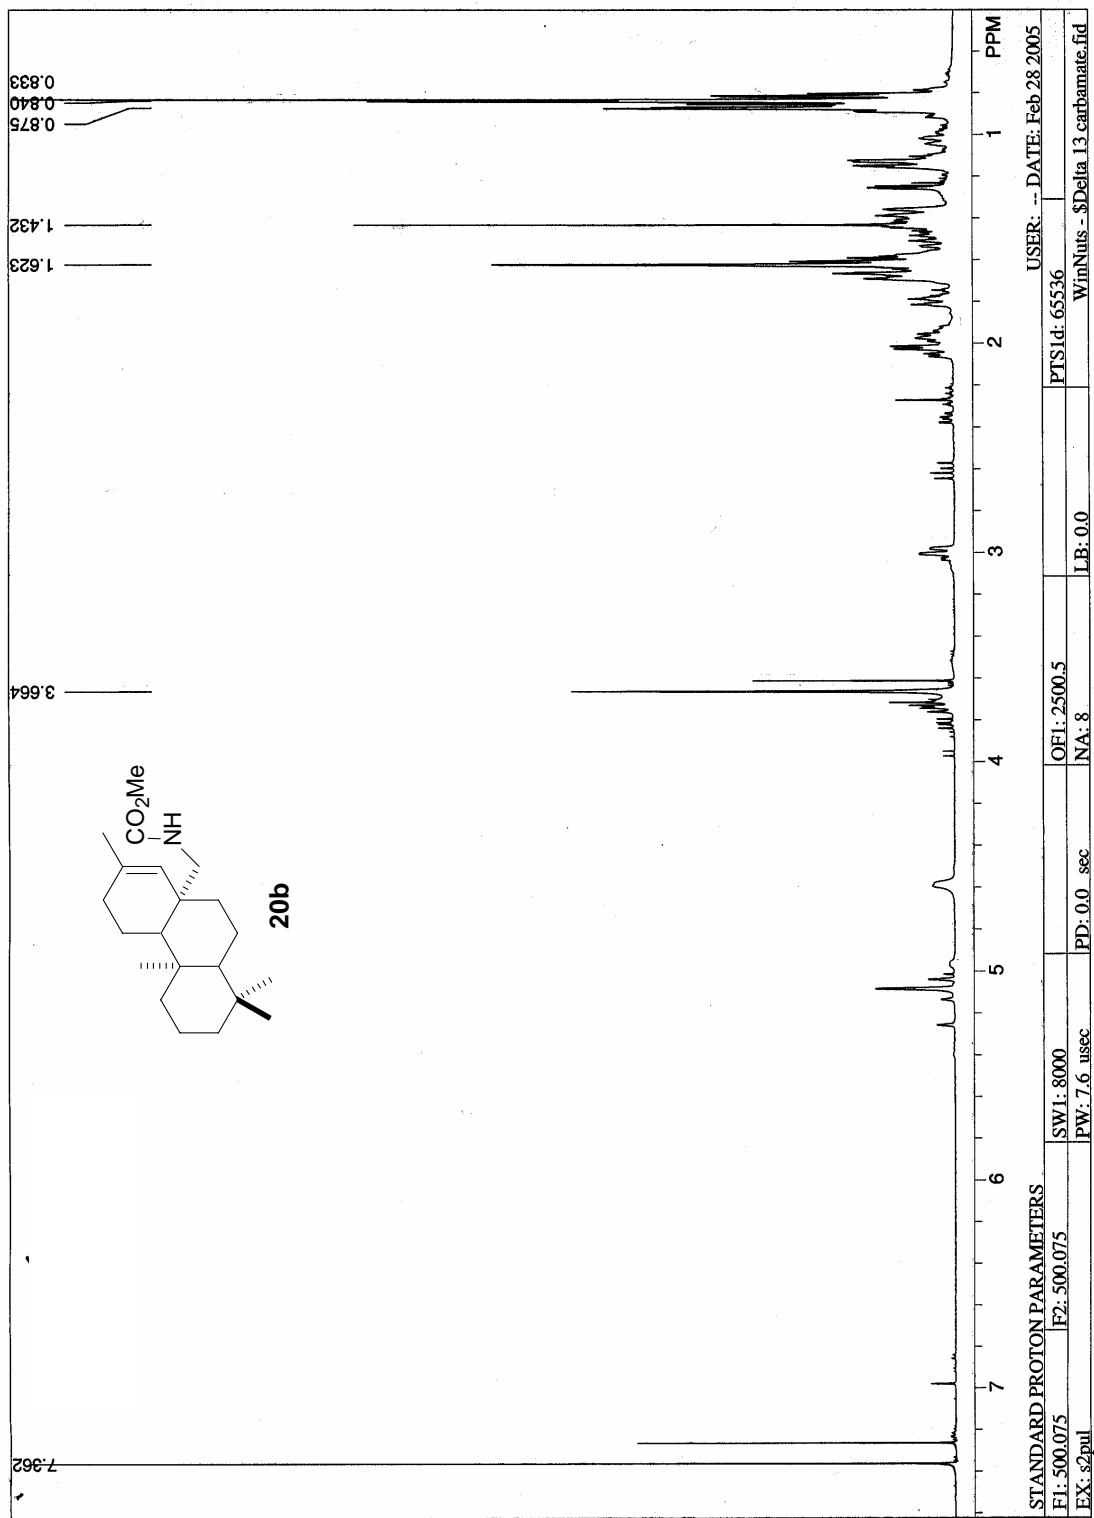

Filname:

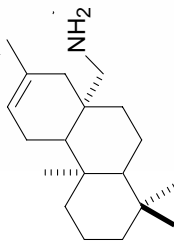

21

STANDARD PROTON PARAMETERS

Pulse Sequence: s2pul

Solvent: CDCl3

Ambient temperature

UNITY-500 <sup>1</sup>H500

Pulse 45.0 degrees

Acq. time 4.665 sec

Width 7024.9 Hz

4 repetitions

OBSERVE H1, 499.696458 MHz

DATA PROCESSING

F1 size 65536

Total time 0 min, 18 sec

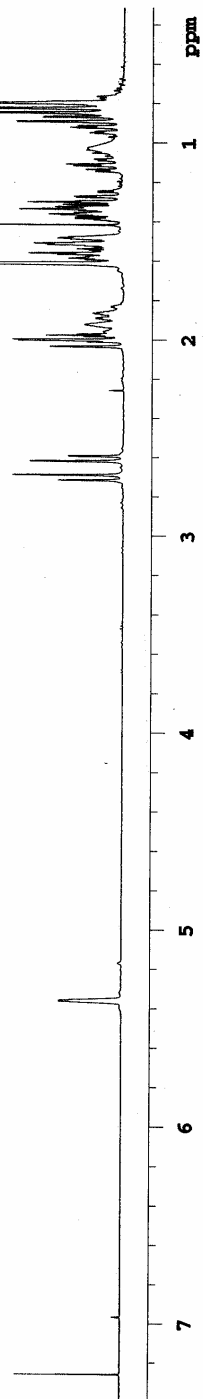



| INDEX | FREQUENCY (PPM) | FREQUENCY (Hz) | HEIGHT |
|-------|-----------------|----------------|--------|
| 1     | 131.168         | 13191.226      | 16.6   |
| 2     | 120.926         | 12161.227      | 44.1   |
| 3     | 77.319          | 7775.717       | 93.3   |
| 4     | 77.000          | 7743.673       | 95.1   |
| 5     | 76.681          | 7711.628       | 94.0   |
| 6     | 57.214          | 5753.866       | 41.5   |
| 7     | 53.838          | 5414.347       | 39.7   |
| 8     | 42.572          | 4281.348       | 40.1   |
| 9     | 41.920          | 4215.733       | 55.3   |
| 10    | 40.304          | 4053.222       | 24.3   |
| 11    | 39.735          | 3996.000       | 40.9   |
| 12    | 37.079          | 3728.963       | 24.1   |
| 13    | 26.563          | 2677.081       | 34.4   |
| 14    | 23.423          | 2361.215       | 40.4   |
| 15    | 23.233          | 2342.140       | 21.3   |
| 16    | 20.297          | 2046.874       | 9.0    |
| 17    | 23.560          | 2369.363       | 39.1   |
| 18    | 22.414          | 2254.156       | 40.4   |
| 19    | 21.656          | 2177.859       | 47.3   |
| 20    | 18.568          | 1867.334       | 49.6   |
| 21    | 18.416          | 1852.074       | 39.4   |
| 22    | 15.966          | 1605.637       | 37.7   |

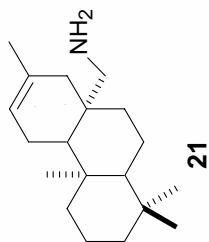

21

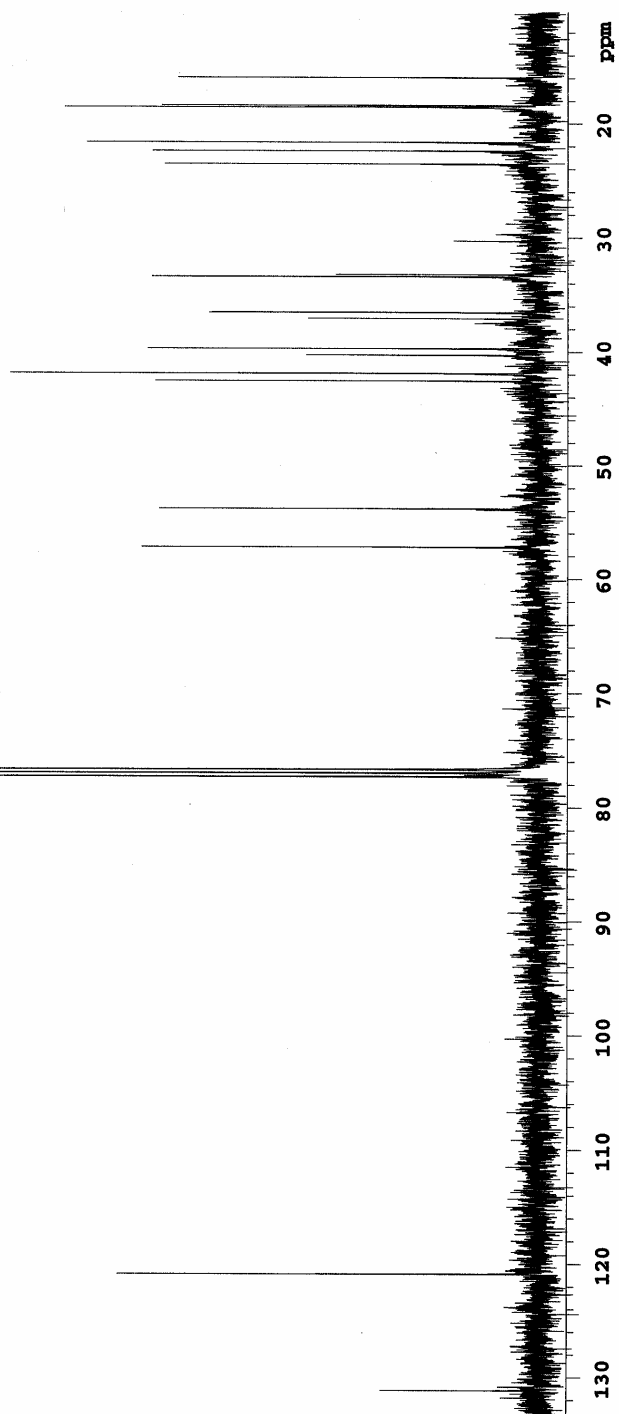

Filename: --

STANDARD PROTON PARAMETERS

Pulse Sequence: s2pul

Solvent: CDCl3

Ambient temperature

UNITY-500 4500°

Pulse 45.0 degrees

Acq. time 4.665 sec

Width 7024.9 Hz

4 repetitions

OBSERVE E1, 499.6964456 MHz

DATA PROCESSING

FT size 65536

Total time 0 min, 18 sec

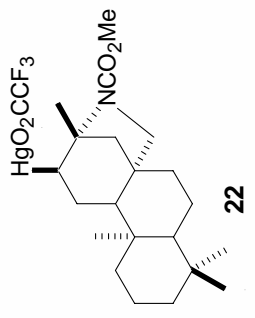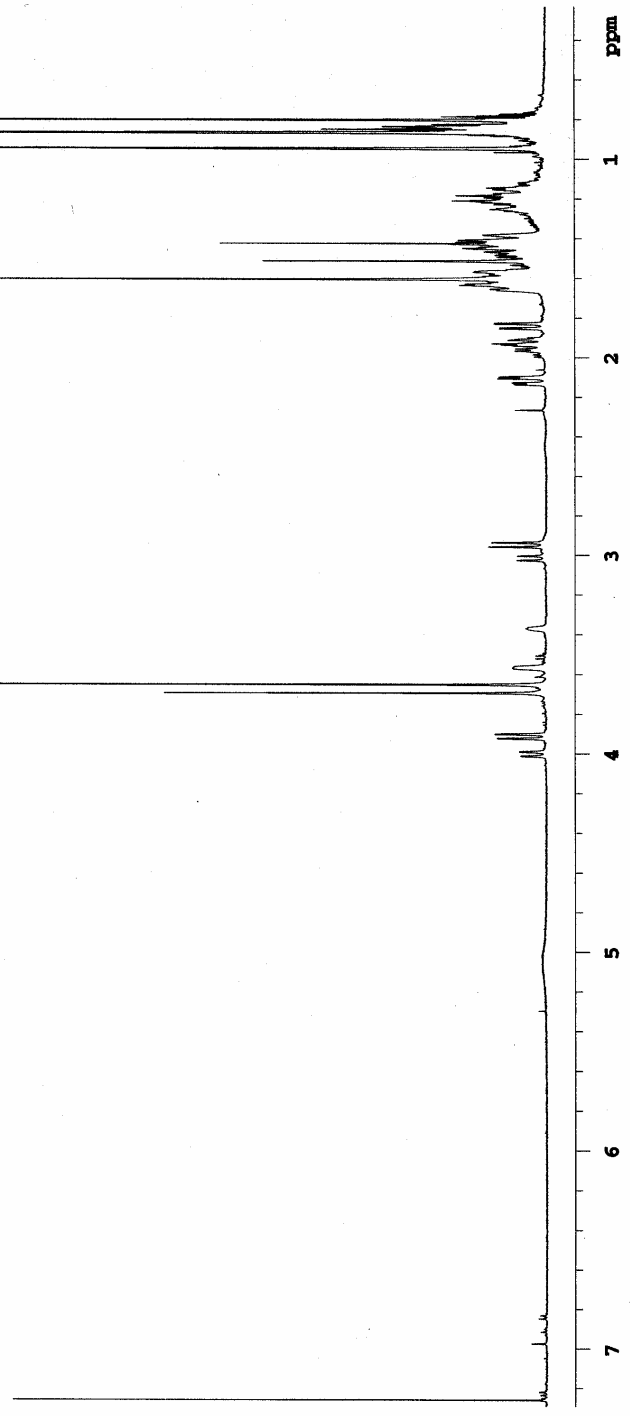

STANDARD IR OBSERVE

```

expl stdlb
SAMPLE
date Oct 18 2004 dn
solvent CDCl3 dof
file exp dm
ACQUISITION dnm c
sfreq 399.951 dmf 200
tn H1 dpwr 20
at 4.096 PROCESSING
np 65536 lb 0.30
sw 8000.0 wfile
fb 4400 proc ft
bs 16 fn not used
tpwr 63 math f
pw 9.0
dl 0 werr
tof -425.7 wexp
nt 6 wbs
ct 6 wat
alock n DISPLAY
gain not used sp 113.5
FLAGS wp 2914.2
il n vs 162
in n sc 0
dp y wc 250
hs n hzmm 11.66
is 500.00
rfi 4903.2
rfp 2903.6
th 20
ins 100.000
na ph
    
```

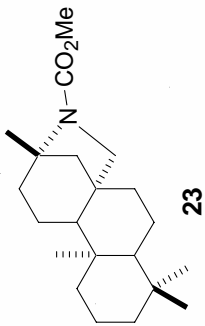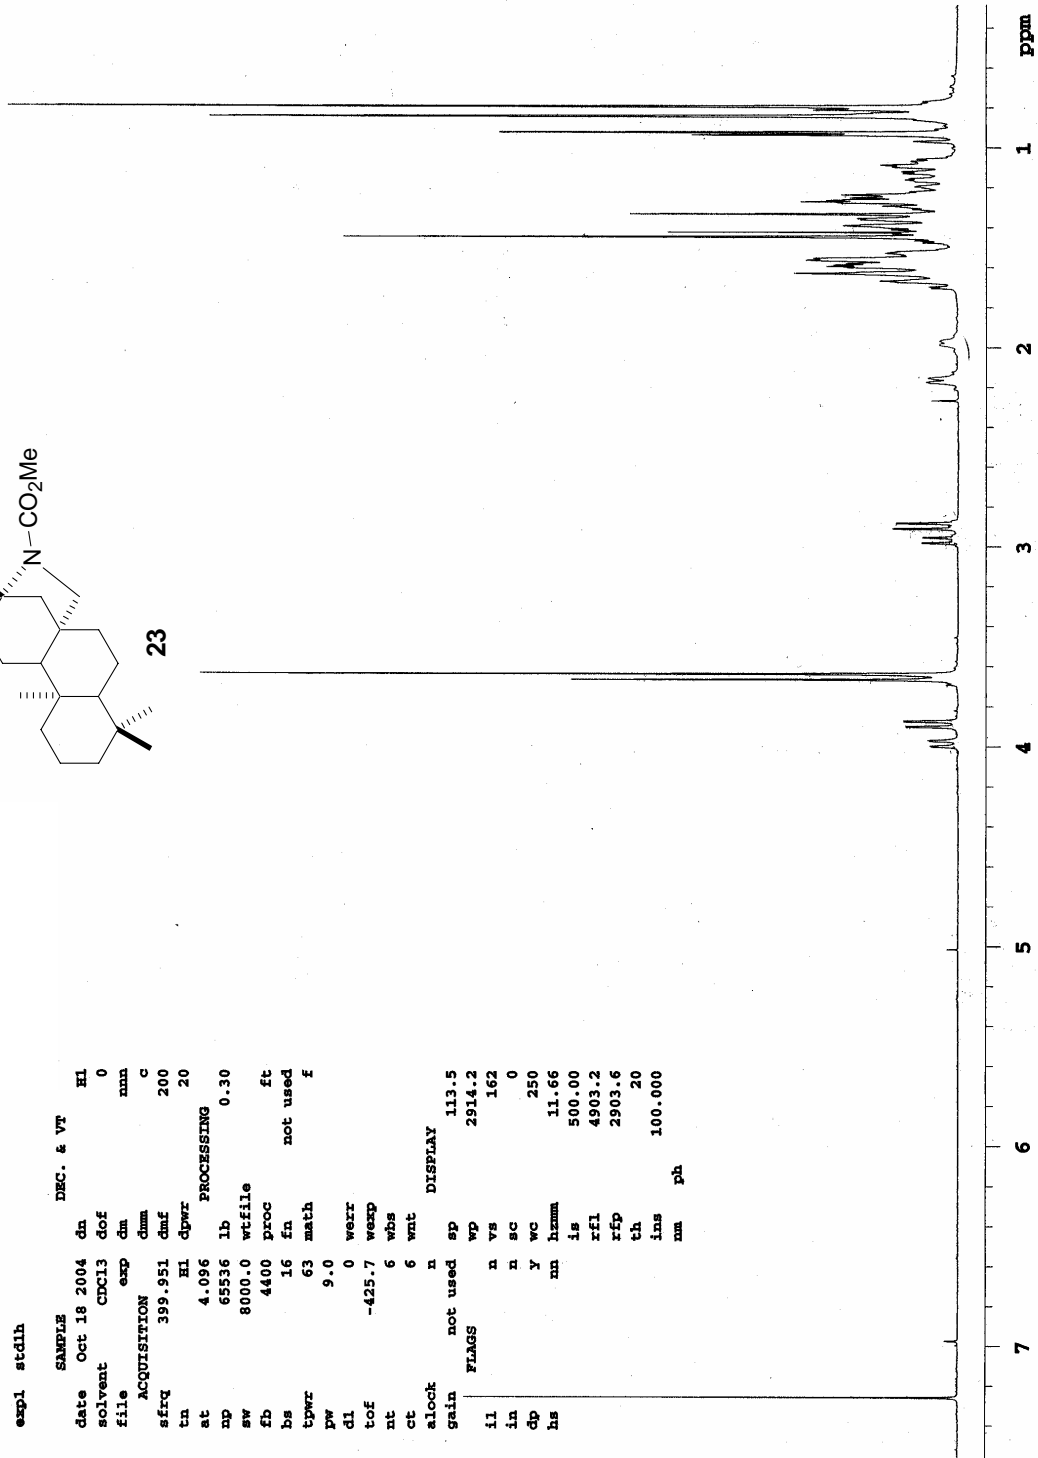

STANDARD 1H OBSERVE

Pulse Sequence: s2pul  
Solvent: CDCl3  
Ambient temperature  
UNIT-400 "u400"

Pulse 45.0 degrees  
Acq. time 4.096 sec  
Width 8000.0 Hz  
4 repetitions

OBSERVE EL, 399.9486778 MHz  
DATA PROCESSING  
Line broadening 0.3 Hz  
Ft size 65536  
Total time 0 min, 16 sec

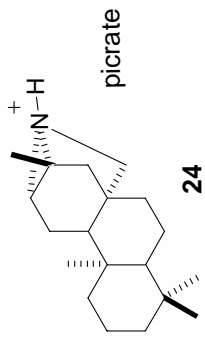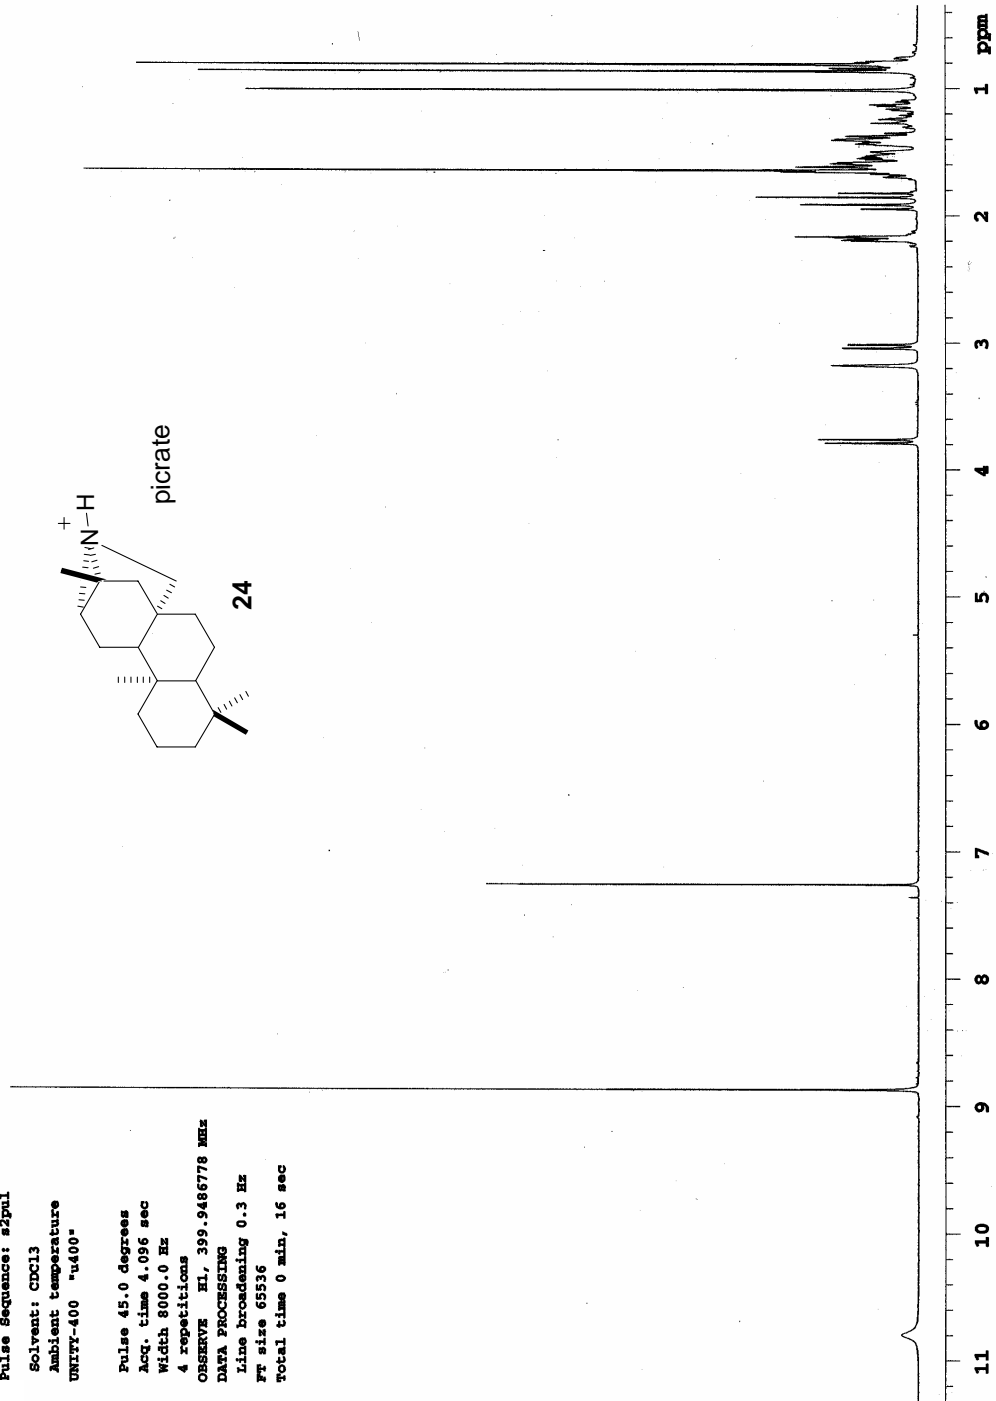

| INDEX | FREQUENCY (PPM) | FREQUENCY (Hz) | HEIGHT |
|-------|-----------------|----------------|--------|
| 1     | 161.846         | 20335.720      | 1.4    |
| 2     | 141.682         | 17802.177      | 1.9    |
| 3     | 128.384         | 16131.254      | 1.2    |
| 4     | 126.559         | 15902.020      | 12.9   |
| 5     | 77.256          | 9707.177       | 17.7   |
| 6     | 77.000          | 9674.955       | 17.7   |
| 7     | 76.751          | 9643.654       | 17.9   |
| 8     | 55.019          | 6943.099       | 7.3    |
| 9     | 53.305          | 6697.674       | 4.7    |
| 10    | 50.880          | 6392.950       | 5.7    |
| 11    | 49.524          | 6222.635       | 7.3    |
| 12    | 45.868          | 5763.246       | 6.1    |
| 13    | 44.688          | 5615.027       | 6.8    |
| 14    | 41.545          | 5220.081       | 6.3    |
| 15    | 39.977          | 5023.069       | 4.7    |
| 16    | 38.739          | 4867.484       | 6.8    |
| 17    | 37.823          | 4752.407       | 4.4    |
| 18    | 34.453          | 4328.923       | 6.3    |
| 19    | 33.251          | 4177.941       | 6.4    |
| 20    | 32.870          | 4130.069       | 4.6    |
| 21    | 21.586          | 2712.316       | 6.4    |
| 22    | 19.660          | 2470.193       | 6.5    |
| 23    | 17.703          | 2224.388       | 5.9    |
| 24    | 17.088          | 2147.056       | 7.1    |
| 25    | 17.066          | 2144.294       | 6.3    |
| 26    | 14.120          | 1774.206       | 6.5    |

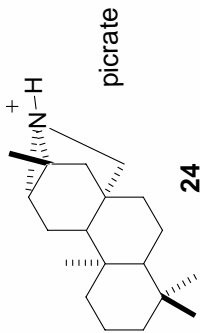

24

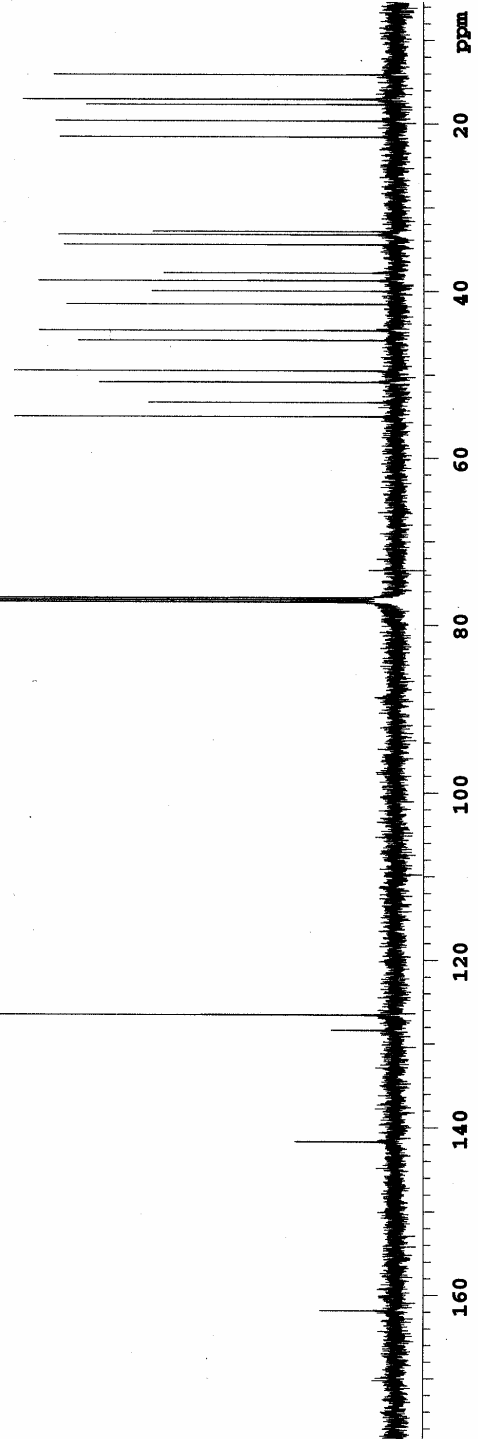

STANDARD 1H OBSERVE

```

exp1 stdih
SAMPLE
date Jul 11 2004 dn H1
solvent CDCl3 dof 0
file exp dm mnm
ACQUISITION
sfreq 399.951 cmf 200 C
tn H1 dpr 20
at 4.096 PROCESSING
np 65536 lb 0.30
sw 8000.0 wfile
fb 4400 proc ft
bs 16 fm not used
tpwr 63 math F
pw 10.1
dl 0 werr
tof -425.7 wecp
nt 6 wbs
ct 6 wnt
alock n DISPLAY
gain not used sp 160.1
FRAGS wp 2879.5
il n vs 162
in n sc 0
cp y wc 250
hs nm hzmm 11.52
is 500.00
xfl 4903.0
rfp 2903.6
th 20
ins 100.000
nm ph
  
```

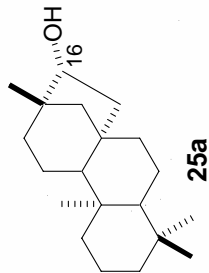

25a

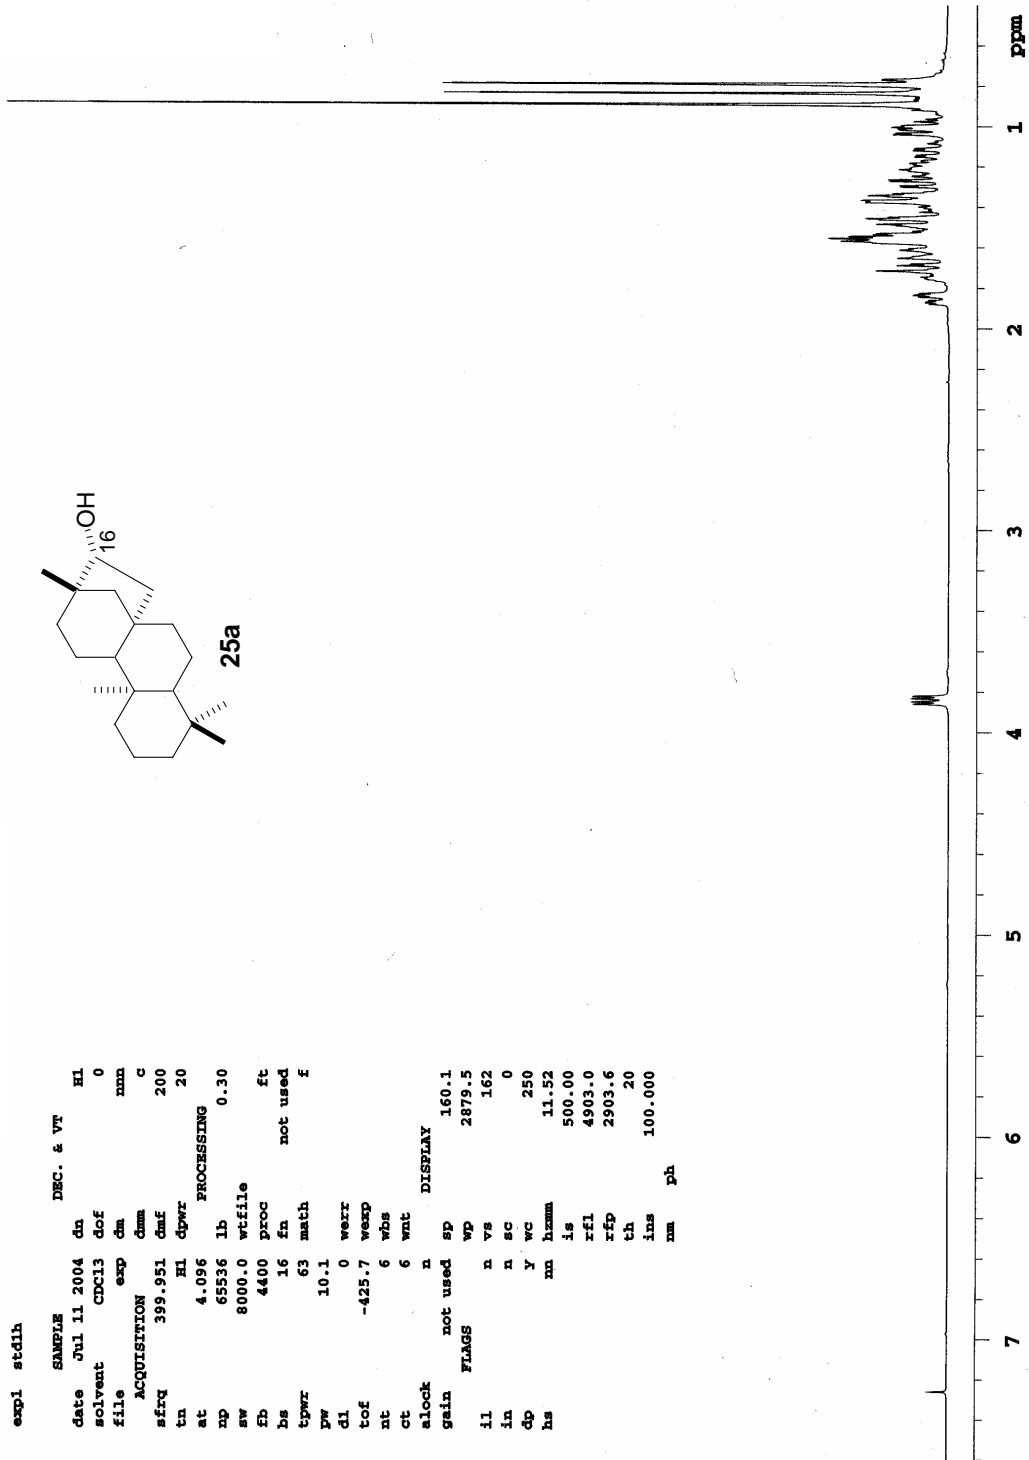

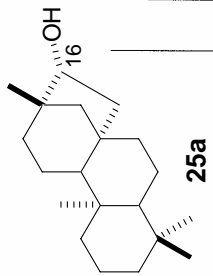

| INDEX | FREQUENCY (PPM) | FREQUENCY (Hz) | HEIGHT |
|-------|-----------------|----------------|--------|
| 1     | 80.702          | 8115.998       | 155.1  |
| 2     | 77.319          | 7775.717       | 77.0   |
| 3     | 77.000          | 7743.673       | 81.5   |
| 4     | 76.681          | 7711.628       | 81.8   |
| 5     | 56.493          | 5681.384       | 177.9  |
| 6     | 56.243          | 5656.207       | 156.5  |
| 7     | 55.538          | 5585.251       | 197.5  |
| 8     | 43.073          | 4331.703       | 148.5  |
| 9     | 42.018          | 4225.651       | 103.1  |
| 10    | 42.003          | 4224.126       | 115.0  |
| 11    | 41.958          | 4219.548       | 198.1  |
| 12    | 41.555          | 4179.111       | 164.8  |
| 13    | 39.507          | 3973.111       | 190.0  |
| 14    | 37.663          | 3767.711       | 58.4   |
| 15    | 33.726          | 3391.733       | 185.7  |
| 16    | 33.643          | 3383.341       | 165.8  |
| 17    | 33.081          | 3326.881       | 63.7   |
| 18    | 24.926          | 2506.696       | 145.3  |
| 19    | 21.944          | 2206.852       | 151.9  |
| 20    | 20.116          | 2022.978       | 201.4  |
| 21    | 20.101          | 2021.452       | 195.6  |
| 22    | 18.325          | 1842.919       | 149.4  |
| 23    | 14.805          | 1488.904       | 164.0  |

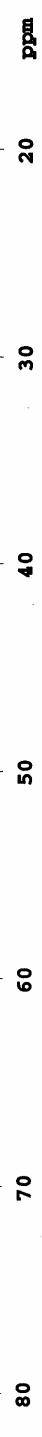

STANDARD 1H OBSERVE

```

exp1 stdlh
SAMPLE
date Sep 9 2004 dn HI
solvent CDCl3 dof 0
file exp dm nua
ACQUISITION exp dnm c
sfrq 399.951 dmf 200
tn HI dpwr 20
at 4.096 PROCESSING
np 65536 lb 0.30
sw 8000.0 wfile ft
fb 4400 proc not used
bs 16 fn f
tpwr 63 math
pw 9.0
dl 0 werr
tof -425.7 wexp
nt 8 wbs
ct 8 wnt
alock n DISPLAY
gain not used sp 78.6
FLAGS vp 2914.2
il n vs 162
in n sc 0
dp y wc 250
hs nm hzmm 11.66
is 500.00
rfl 4903.2
rfp 2903.6
th 20
ins 100.000
na ph
  
```

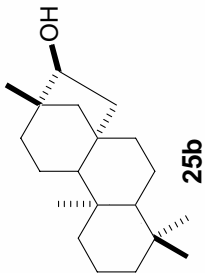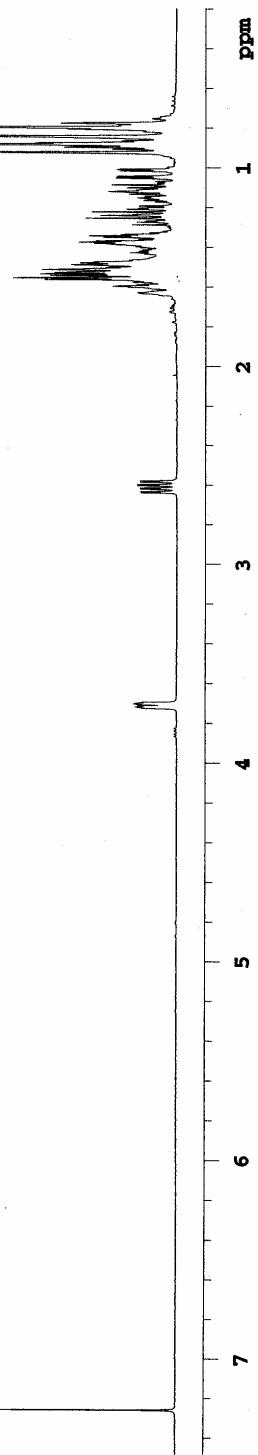



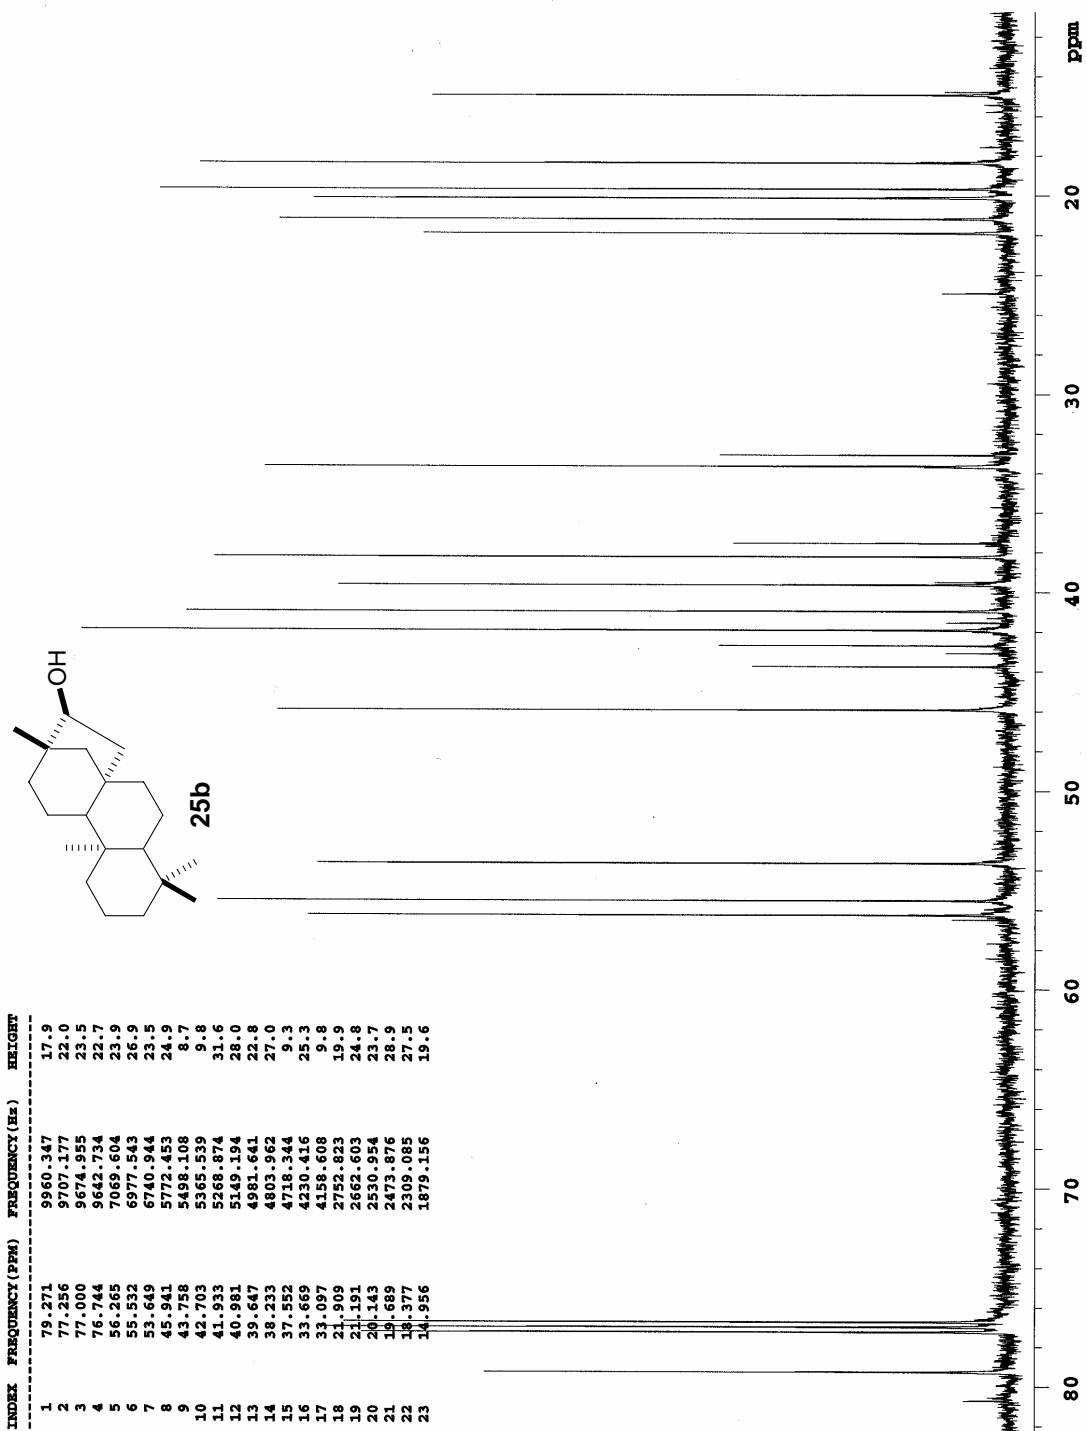

**ORTEP diagram and Tables of crystal data, atomic coordinates, bond angles and bond lengths, and anisotropic displacement parameters from the X-ray crystal determination with unsaturated nitrile 18a (ID code g30bam)**

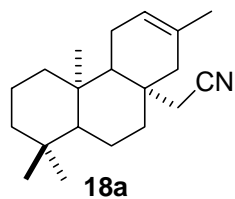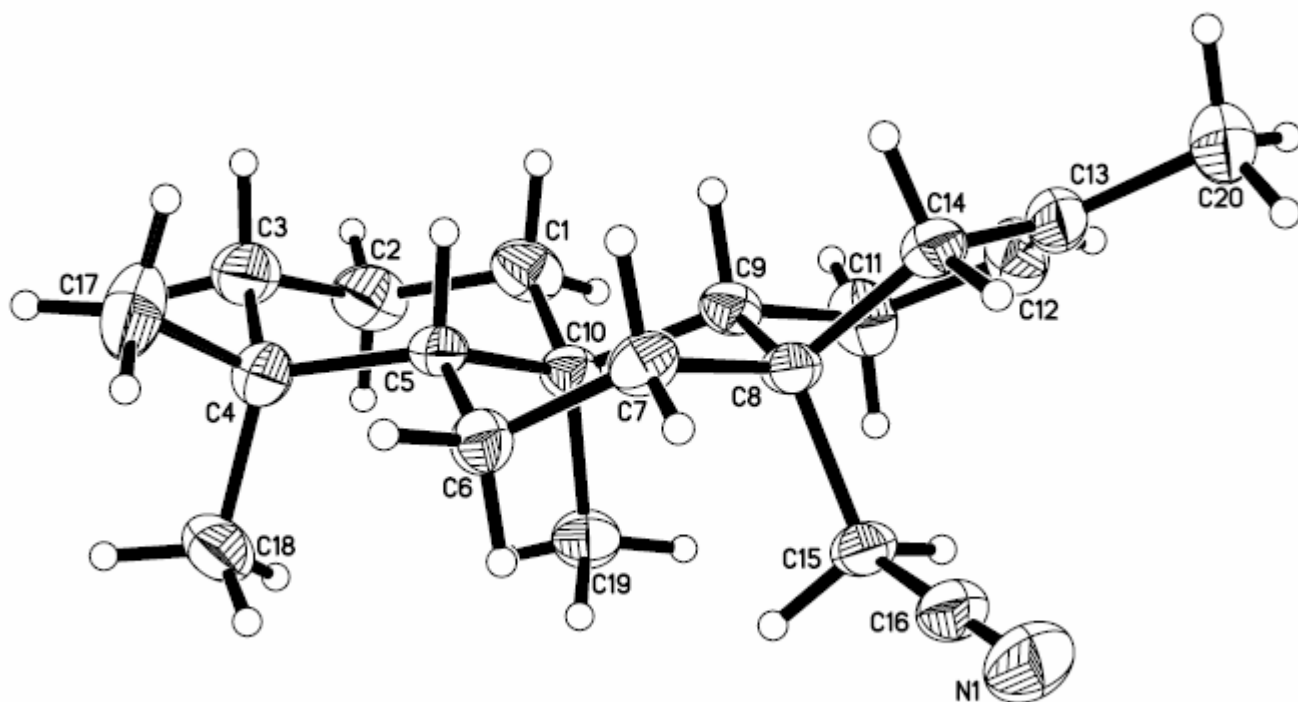

Table 1. Crystal data and structure refinement for unsaturated nitrile **18a**

|                      |                                   |                  |
|----------------------|-----------------------------------|------------------|
| Identification code  | g30bam                            |                  |
| Empirical formula    | C <sub>20</sub> H <sub>31</sub> N |                  |
| Formula weight       | 285.46                            |                  |
| Temperature          | 193(2) K                          |                  |
| Wavelength           | 0.71073 Å                         |                  |
| Crystal system       | Monoclinic                        |                  |
| Space group          | P 21                              |                  |
| Unit cell dimensions | a = 7.903(6) Å                    | α = 90°.         |
|                      | b = 9.454(7) Å                    | β = 97.736(12)°. |
|                      | c = 11.846(9) Å                   | γ = 90°.         |

|                                   |                                             |
|-----------------------------------|---------------------------------------------|
| Volume                            | 877.0(12) Å <sup>3</sup>                    |
| Z                                 | 2                                           |
| Density (calculated)              | 1.081 Mg/m <sup>3</sup>                     |
| Absorption coefficient            | 0.061 mm <sup>-1</sup>                      |
| F(000)                            | 316                                         |
| Crystal size                      | 0.70 x 0.32 x 0.20 mm <sup>3</sup>          |
| Theta range for data collection   | 1.73 to 25.56°.                             |
| Index ranges                      | -9<=h<=9, -11<=k<=11, -14<=l<=14            |
| Reflections collected             | 9150                                        |
| Independent reflections           | 1735 [R(int) = 0.1151]                      |
| Completeness to theta = 25.56°    | 99.1 %                                      |
| Absorption correction             | Numerical                                   |
| Max. and min. transmission        | 0.99213 and 0.96142                         |
| Refinement method                 | Full-matrix least-squares on F <sup>2</sup> |
| Data / restraints / parameters    | 1735 / 1 / 194                              |
| Goodness-of-fit on F <sup>2</sup> | 0.911                                       |
| Final R indices [I>2sigma(I)]     | R1 = 0.0462, wR2 = 0.1138                   |
| R indices (all data)              | R1 = 0.0616, wR2 = 0.1241                   |
| Absolute structure parameter      | -10(10)                                     |
| Largest diff. peak and hole       | 0.211 and -0.149 e.Å <sup>-3</sup>          |

Table 2. Atomic coordinates ( $\times 10^4$ ) and equivalent isotropic displacement parameters ( $\text{\AA}^2 \times 10^3$ ) for g30bam.  $U(\text{eq})$  is defined as one third of the trace of the orthogonalized  $U^{ij}$  tensor.

|       | x        | y       | z       | $U(\text{eq})$ |
|-------|----------|---------|---------|----------------|
| C(1)  | -144(3)  | 6220(3) | 6674(3) | 53(1)          |
| C(2)  | 590(4)   | 7589(3) | 6233(3) | 60(1)          |
| C(3)  | 1980(4)  | 7283(3) | 5495(3) | 59(1)          |
| C(4)  | 3462(3)  | 6369(3) | 6079(2) | 50(1)          |
| C(5)  | 2674(3)  | 5027(3) | 6579(2) | 38(1)          |
| C(6)  | 3986(3)  | 3945(3) | 7114(2) | 41(1)          |
| C(7)  | 3141(3)  | 2505(3) | 7196(2) | 39(1)          |
| C(8)  | 1628(3)  | 2526(3) | 7894(2) | 34(1)          |
| C(9)  | 408(3)   | 3783(3) | 7518(2) | 38(1)          |
| C(10) | 1242(3)  | 5267(3) | 7347(2) | 37(1)          |
| C(11) | -1084(3) | 3820(4) | 8236(3) | 55(1)          |
| C(12) | -1828(3) | 2376(4) | 8382(3) | 57(1)          |
| C(13) | -1122(3) | 1177(3) | 8120(2) | 49(1)          |
| C(14) | 585(3)   | 1157(3) | 7671(2) | 42(1)          |
| C(15) | 2326(3)  | 2594(3) | 9196(2) | 41(1)          |
| C(16) | 3278(3)  | 1312(3) | 9586(2) | 47(1)          |
| C(17) | 4557(5)  | 5921(4) | 5151(3) | 74(1)          |
| C(18) | 4635(4)  | 7249(4) | 6969(3) | 63(1)          |
| C(19) | 1876(3)  | 5990(3) | 8501(2) | 46(1)          |
| C(20) | -1956(5) | -245(4) | 8214(3) | 68(1)          |
| N(1)  | 4013(3)  | 300(3)  | 9890(2) | 68(1)          |

Table 3. Bond lengths [Å] and angles [°] for g30bam.

---

|              |          |
|--------------|----------|
| C(1)-C(2)    | 1.538(5) |
| C(1)-C(10)   | 1.553(4) |
| C(1)-H(1A)   | 0.9900   |
| C(1)-H(1B)   | 0.9900   |
| C(2)-C(3)    | 1.521(5) |
| C(2)-H(2A)   | 0.9900   |
| C(2)-H(2B)   | 0.9900   |
| C(3)-C(4)    | 1.542(4) |
| C(3)-H(3A)   | 0.9900   |
| C(3)-H(3B)   | 0.9900   |
| C(4)-C(17)   | 1.547(5) |
| C(4)-C(18)   | 1.549(4) |
| C(4)-C(5)    | 1.564(4) |
| C(5)-C(6)    | 1.532(4) |
| C(5)-C(10)   | 1.561(4) |
| C(5)-H(5A)   | 1.0000   |
| C(6)-C(7)    | 1.525(4) |
| C(6)-H(6A)   | 0.9900   |
| C(6)-H(6B)   | 0.9900   |
| C(7)-C(8)    | 1.543(3) |
| C(7)-H(7A)   | 0.9900   |
| C(7)-H(7B)   | 0.9900   |
| C(8)-C(14)   | 1.538(4) |
| C(8)-C(9)    | 1.557(4) |
| C(8)-C(15)   | 1.568(3) |
| C(9)-C(11)   | 1.544(4) |
| C(9)-C(10)   | 1.575(4) |
| C(9)-H(9A)   | 1.0000   |
| C(10)-C(19)  | 1.550(4) |
| C(11)-C(12)  | 1.506(5) |
| C(11)-H(11A) | 0.9900   |
| C(11)-H(11B) | 0.9900   |
| C(12)-C(13)  | 1.318(5) |
| C(12)-H(12A) | 0.9500   |
| C(13)-C(20)  | 1.508(4) |
| C(13)-C(14)  | 1.515(4) |

|                  |          |
|------------------|----------|
| C(14)-H(14A)     | 0.9900   |
| C(14)-H(14B)     | 0.9900   |
| C(15)-C(16)      | 1.468(4) |
| C(15)-H(15A)     | 0.9900   |
| C(15)-H(15B)     | 0.9900   |
| C(16)-N(1)       | 1.151(4) |
| C(17)-H(17A)     | 0.9800   |
| C(17)-H(17B)     | 0.9800   |
| C(17)-H(17C)     | 0.9800   |
| C(18)-H(18A)     | 0.9800   |
| C(18)-H(18B)     | 0.9800   |
| C(18)-H(18C)     | 0.9800   |
| C(19)-H(19A)     | 0.9800   |
| C(19)-H(19B)     | 0.9800   |
| C(19)-H(19C)     | 0.9800   |
| C(20)-H(20A)     | 0.9800   |
| C(20)-H(20B)     | 0.9800   |
| C(20)-H(20C)     | 0.9800   |
| C(2)-C(1)-C(10)  | 113.0(2) |
| C(2)-C(1)-H(1A)  | 109.0    |
| C(10)-C(1)-H(1A) | 109.0    |
| C(2)-C(1)-H(1B)  | 109.0    |
| C(10)-C(1)-H(1B) | 109.0    |
| H(1A)-C(1)-H(1B) | 107.8    |
| C(3)-C(2)-C(1)   | 111.7(3) |
| C(3)-C(2)-H(2A)  | 109.3    |
| C(1)-C(2)-H(2A)  | 109.3    |
| C(3)-C(2)-H(2B)  | 109.3    |
| C(1)-C(2)-H(2B)  | 109.3    |
| H(2A)-C(2)-H(2B) | 107.9    |
| C(2)-C(3)-C(4)   | 114.4(2) |
| C(2)-C(3)-H(3A)  | 108.7    |
| C(4)-C(3)-H(3A)  | 108.7    |
| C(2)-C(3)-H(3B)  | 108.7    |
| C(4)-C(3)-H(3B)  | 108.7    |
| H(3A)-C(3)-H(3B) | 107.6    |
| C(3)-C(4)-C(17)  | 107.4(2) |
| C(3)-C(4)-C(18)  | 110.7(3) |

|                  |            |
|------------------|------------|
| C(17)-C(4)-C(18) | 106.9(3)   |
| C(3)-C(4)-C(5)   | 107.9(2)   |
| C(17)-C(4)-C(5)  | 109.6(3)   |
| C(18)-C(4)-C(5)  | 114.2(2)   |
| C(6)-C(5)-C(10)  | 111.0(2)   |
| C(6)-C(5)-C(4)   | 114.6(2)   |
| C(10)-C(5)-C(4)  | 117.4(2)   |
| C(6)-C(5)-H(5A)  | 104.0      |
| C(10)-C(5)-H(5A) | 104.0      |
| C(4)-C(5)-H(5A)  | 104.0      |
| C(7)-C(6)-C(5)   | 110.1(2)   |
| C(7)-C(6)-H(6A)  | 109.6      |
| C(5)-C(6)-H(6A)  | 109.6      |
| C(7)-C(6)-H(6B)  | 109.6      |
| C(5)-C(6)-H(6B)  | 109.6      |
| H(6A)-C(6)-H(6B) | 108.1      |
| C(6)-C(7)-C(8)   | 113.6(2)   |
| C(6)-C(7)-H(7A)  | 108.8      |
| C(8)-C(7)-H(7A)  | 108.8      |
| C(6)-C(7)-H(7B)  | 108.8      |
| C(8)-C(7)-H(7B)  | 108.8      |
| H(7A)-C(7)-H(7B) | 107.7      |
| C(14)-C(8)-C(7)  | 109.5(2)   |
| C(14)-C(8)-C(9)  | 107.25(18) |
| C(7)-C(8)-C(9)   | 110.5(2)   |
| C(14)-C(8)-C(15) | 108.3(2)   |
| C(7)-C(8)-C(15)  | 109.41(18) |
| C(9)-C(8)-C(15)  | 111.8(2)   |
| C(11)-C(9)-C(8)  | 110.4(2)   |
| C(11)-C(9)-C(10) | 114.5(2)   |
| C(8)-C(9)-C(10)  | 117.62(18) |
| C(11)-C(9)-H(9A) | 104.2      |
| C(8)-C(9)-H(9A)  | 104.2      |
| C(10)-C(9)-H(9A) | 104.2      |
| C(19)-C(10)-C(1) | 108.6(2)   |
| C(19)-C(10)-C(5) | 113.86(19) |
| C(1)-C(10)-C(5)  | 107.6(2)   |
| C(19)-C(10)-C(9) | 111.7(2)   |

|                     |            |
|---------------------|------------|
| C(1)-C(10)-C(9)     | 107.74(19) |
| C(5)-C(10)-C(9)     | 107.1(2)   |
| C(12)-C(11)-C(9)    | 112.4(3)   |
| C(12)-C(11)-H(11A)  | 109.1      |
| C(9)-C(11)-H(11A)   | 109.1      |
| C(12)-C(11)-H(11B)  | 109.1      |
| C(9)-C(11)-H(11B)   | 109.1      |
| H(11A)-C(11)-H(11B) | 107.9      |
| C(13)-C(12)-C(11)   | 124.6(2)   |
| C(13)-C(12)-H(12A)  | 117.7      |
| C(11)-C(12)-H(12A)  | 117.7      |
| C(12)-C(13)-C(20)   | 123.1(3)   |
| C(12)-C(13)-C(14)   | 121.3(3)   |
| C(20)-C(13)-C(14)   | 115.7(3)   |
| C(13)-C(14)-C(8)    | 114.2(2)   |
| C(13)-C(14)-H(14A)  | 108.7      |
| C(8)-C(14)-H(14A)   | 108.7      |
| C(13)-C(14)-H(14B)  | 108.7      |
| C(8)-C(14)-H(14B)   | 108.7      |
| H(14A)-C(14)-H(14B) | 107.6      |
| C(16)-C(15)-C(8)    | 111.9(2)   |
| C(16)-C(15)-H(15A)  | 109.2      |
| C(8)-C(15)-H(15A)   | 109.2      |
| C(16)-C(15)-H(15B)  | 109.2      |
| C(8)-C(15)-H(15B)   | 109.2      |
| H(15A)-C(15)-H(15B) | 107.9      |
| N(1)-C(16)-C(15)    | 179.5(3)   |
| C(4)-C(17)-H(17A)   | 109.5      |
| C(4)-C(17)-H(17B)   | 109.5      |
| H(17A)-C(17)-H(17B) | 109.5      |
| C(4)-C(17)-H(17C)   | 109.5      |
| H(17A)-C(17)-H(17C) | 109.5      |
| H(17B)-C(17)-H(17C) | 109.5      |
| C(4)-C(18)-H(18A)   | 109.5      |
| C(4)-C(18)-H(18B)   | 109.5      |
| H(18A)-C(18)-H(18B) | 109.5      |
| C(4)-C(18)-H(18C)   | 109.5      |
| H(18A)-C(18)-H(18C) | 109.5      |



|                     |       |
|---------------------|-------|
| H(18B)-C(18)-H(18C) | 109.5 |
| C(10)-C(19)-H(19A)  | 109.5 |
| C(10)-C(19)-H(19B)  | 109.5 |
| H(19A)-C(19)-H(19B) | 109.5 |
| C(10)-C(19)-H(19C)  | 109.5 |
| H(19A)-C(19)-H(19C) | 109.5 |
| H(19B)-C(19)-H(19C) | 109.5 |
| C(13)-C(20)-H(20A)  | 109.5 |
| C(13)-C(20)-H(20B)  | 109.5 |
| H(20A)-C(20)-H(20B) | 109.5 |
| C(13)-C(20)-H(20C)  | 109.5 |
| H(20A)-C(20)-H(20C) | 109.5 |
| H(20B)-C(20)-H(20C) | 109.5 |

---

Symmetry transformations used to generate equivalent atoms:

Table 4. Anisotropic displacement parameters ( $\text{\AA}^2 \times 10^3$ ) for g30bam. The anisotropic displacement factor exponent takes the form:  $-2\pi^2 [ h^2 a^2 U^{11} + \dots + 2 h k a^* b^* U^{12} ]$

|       | U <sup>11</sup> | U <sup>22</sup> | U <sup>33</sup> | U <sup>23</sup> | U <sup>13</sup> | U <sup>12</sup> |
|-------|-----------------|-----------------|-----------------|-----------------|-----------------|-----------------|
| C(1)  | 44(1)           | 44(2)           | 65(2)           | 2(2)            | -8(1)           | 4(1)            |
| C(2)  | 59(2)           | 44(2)           | 71(2)           | 11(2)           | -14(2)          | 6(2)            |
| C(3)  | 73(2)           | 47(2)           | 52(2)           | 11(2)           | -9(2)           | -12(2)          |
| C(4)  | 56(2)           | 49(2)           | 42(2)           | 9(1)            | 2(1)            | -9(1)           |
| C(5)  | 43(1)           | 38(1)           | 31(1)           | -2(1)           | -2(1)           | -8(1)           |
| C(6)  | 36(1)           | 48(2)           | 39(1)           | 1(1)            | 8(1)            | 0(1)            |
| C(7)  | 43(1)           | 42(1)           | 34(1)           | -1(1)           | 5(1)            | 7(1)            |
| C(8)  | 31(1)           | 42(1)           | 27(1)           | -3(1)           | 1(1)            | -2(1)           |
| C(9)  | 31(1)           | 42(2)           | 39(1)           | -1(1)           | -3(1)           | -1(1)           |
| C(10) | 35(1)           | 37(1)           | 38(1)           | 1(1)            | -2(1)           | 1(1)            |
| C(11) | 33(1)           | 57(2)           | 76(2)           | 8(2)            | 10(1)           | 10(1)           |
| C(12) | 33(1)           | 71(2)           | 68(2)           | 17(2)           | 7(1)            | -2(2)           |
| C(13) | 42(1)           | 56(2)           | 46(2)           | 14(2)           | -4(1)           | -7(2)           |
| C(14) | 45(1)           | 43(2)           | 35(1)           | 4(1)            | -3(1)           | -1(1)           |
| C(15) | 37(1)           | 55(2)           | 28(1)           | -1(1)           | 1(1)            | -2(1)           |
| C(16) | 39(1)           | 62(2)           | 37(1)           | 6(1)            | -3(1)           | -3(1)           |
| C(17) | 92(2)           | 73(2)           | 62(2)           | 18(2)           | 32(2)           | -6(2)           |
| C(18) | 57(2)           | 57(2)           | 70(2)           | 6(2)            | -7(2)           | -20(2)          |
| C(19) | 50(1)           | 44(2)           | 43(2)           | -9(1)           | 3(1)            | 1(1)            |
| C(20) | 67(2)           | 70(2)           | 65(2)           | 15(2)           | 5(2)            | -21(2)          |
| N(1)  | 63(2)           | 76(2)           | 60(2)           | 21(2)           | -10(1)          | 8(2)            |

Table 5. Hydrogen coordinates ( $\times 10^4$ ) and isotropic displacement parameters ( $\text{\AA}^2 \times 10^3$ ) for g30bam.

|        | x     | y    | z    | U(eq) |
|--------|-------|------|------|-------|
| H(1A)  | -729  | 5680 | 6019 | 63    |
| H(1B)  | -1007 | 6469 | 7174 | 63    |
| H(2A)  | -341  | 8130 | 5782 | 72    |
| H(2B)  | 1067  | 8181 | 6889 | 72    |
| H(3A)  | 2450  | 8193 | 5264 | 71    |
| H(3B)  | 1459  | 6795 | 4794 | 71    |
| H(5A)  | 2077  | 4531 | 5893 | 45    |
| H(6A)  | 4927  | 3865 | 6644 | 49    |
| H(6B)  | 4476  | 4267 | 7885 | 49    |
| H(7A)  | 4007  | 1825 | 7549 | 47    |
| H(7B)  | 2730  | 2164 | 6417 | 47    |
| H(9A)  | -142  | 3513 | 6738 | 46    |
| H(11A) | -673  | 4220 | 8996 | 66    |
| H(11B) | -1991 | 4451 | 7861 | 66    |
| H(12A) | -2881 | 2325 | 8683 | 68    |
| H(14A) | 384   | 983  | 6840 | 50    |
| H(14B) | 1268  | 357  | 8027 | 50    |
| H(15A) | 3084  | 3427 | 9343 | 49    |
| H(15B) | 1358  | 2716 | 9638 | 49    |
| H(17A) | 3909  | 5255 | 4625 | 111   |
| H(17B) | 5607  | 5465 | 5511 | 111   |
| H(17C) | 4848  | 6758 | 4729 | 111   |
| H(18A) | 3937  | 7741 | 7470 | 94    |
| H(18B) | 5266  | 7944 | 6576 | 94    |
| H(18C) | 5442  | 6618 | 7424 | 94    |
| H(19A) | 2984  | 5592 | 8816 | 69    |
| H(19B) | 1048  | 5826 | 9033 | 69    |
| H(19C) | 1996  | 7009 | 8383 | 69    |
| H(20A) | -3024 | -124 | 8539 | 102   |
| H(20B) | -1186 | -863 | 8709 | 102   |
| H(20C) | -2202 | -671 | 7456 | 102   |

Table 6. Torsion angles [°] for g30bam.

---

|                        |           |
|------------------------|-----------|
| C(10)-C(1)-C(2)-C(3)   | 56.4(3)   |
| C(1)-C(2)-C(3)-C(4)    | -55.6(3)  |
| C(2)-C(3)-C(4)-C(17)   | 169.1(3)  |
| C(2)-C(3)-C(4)-C(18)   | -74.6(3)  |
| C(2)-C(3)-C(4)-C(5)    | 51.0(3)   |
| C(3)-C(4)-C(5)-C(6)    | 175.6(2)  |
| C(17)-C(4)-C(5)-C(6)   | 59.0(3)   |
| C(18)-C(4)-C(5)-C(6)   | -60.9(3)  |
| C(3)-C(4)-C(5)-C(10)   | -51.4(3)  |
| C(17)-C(4)-C(5)-C(10)  | -168.0(2) |
| C(18)-C(4)-C(5)-C(10)  | 72.1(3)   |
| C(10)-C(5)-C(6)-C(7)   | 63.6(3)   |
| C(4)-C(5)-C(6)-C(7)    | -160.5(2) |
| C(5)-C(6)-C(7)-C(8)    | -58.1(3)  |
| C(6)-C(7)-C(8)-C(14)   | 165.4(2)  |
| C(6)-C(7)-C(8)-C(9)    | 47.4(3)   |
| C(6)-C(7)-C(8)-C(15)   | -76.1(3)  |
| C(14)-C(8)-C(9)-C(11)  | 61.9(2)   |
| C(7)-C(8)-C(9)-C(11)   | -178.8(2) |
| C(15)-C(8)-C(9)-C(11)  | -56.6(3)  |
| C(14)-C(8)-C(9)-C(10)  | -164.1(2) |
| C(7)-C(8)-C(9)-C(10)   | -44.8(3)  |
| C(15)-C(8)-C(9)-C(10)  | 77.3(3)   |
| C(2)-C(1)-C(10)-C(19)  | 70.8(3)   |
| C(2)-C(1)-C(10)-C(5)   | -52.9(3)  |
| C(2)-C(1)-C(10)-C(9)   | -168.1(2) |
| C(6)-C(5)-C(10)-C(19)  | 66.8(3)   |
| C(4)-C(5)-C(10)-C(19)  | -67.8(3)  |
| C(6)-C(5)-C(10)-C(1)   | -172.8(2) |
| C(4)-C(5)-C(10)-C(1)   | 52.6(3)   |
| C(6)-C(5)-C(10)-C(9)   | -57.2(2)  |
| C(4)-C(5)-C(10)-C(9)   | 168.2(2)  |
| C(11)-C(9)-C(10)-C(19) | 56.3(3)   |
| C(8)-C(9)-C(10)-C(19)  | -75.8(3)  |
| C(11)-C(9)-C(10)-C(1)  | -62.9(3)  |
| C(8)-C(9)-C(10)-C(1)   | 165.0(2)  |

|                         |           |
|-------------------------|-----------|
| C(11)-C(9)-C(10)-C(5)   | -178.3(2) |
| C(8)-C(9)-C(10)-C(5)    | 49.5(3)   |
| C(8)-C(9)-C(11)-C(12)   | -44.1(3)  |
| C(10)-C(9)-C(11)-C(12)  | -179.6(2) |
| C(9)-C(11)-C(12)-C(13)  | 11.8(4)   |
| C(11)-C(12)-C(13)-C(20) | -176.3(3) |
| C(11)-C(12)-C(13)-C(14) | 2.0(5)    |
| C(12)-C(13)-C(14)-C(8)  | 17.7(4)   |
| C(20)-C(13)-C(14)-C(8)  | -163.8(2) |
| C(7)-C(8)-C(14)-C(13)   | -168.4(2) |
| C(9)-C(8)-C(14)-C(13)   | -48.5(3)  |
| C(15)-C(8)-C(14)-C(13)  | 72.4(3)   |
| C(14)-C(8)-C(15)-C(16)  | 54.0(3)   |
| C(7)-C(8)-C(15)-C(16)   | -65.2(3)  |
| C(9)-C(8)-C(15)-C(16)   | 172.0(2)  |

---

Symmetry transformations used to generate equivalent atoms:

**ORTEP diagram and Tables of crystal data, atomic coordinates, bond angles and bond lengths, and anisotropic displacement parameters from the X-ray crystal structure determination of methyl *ent*-trachyloban-19-oate (3 with axial carbomethoxy group at C4, ID code g24fasm)**

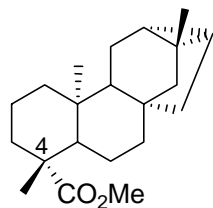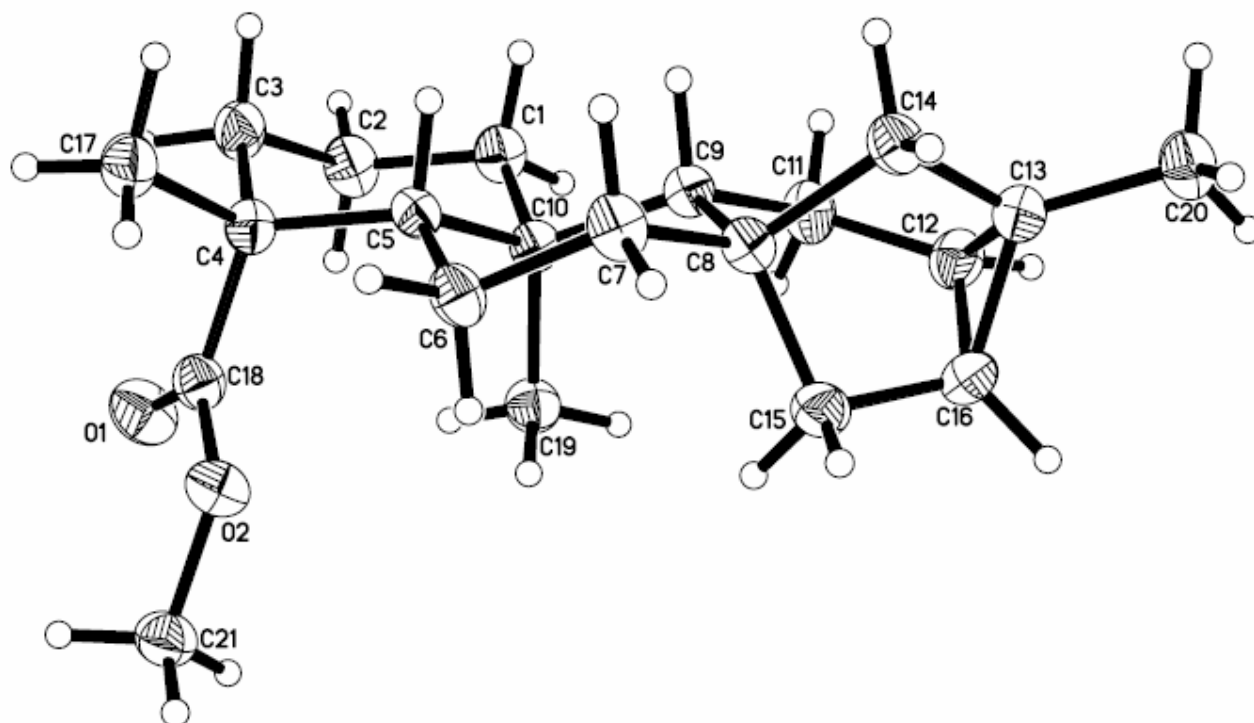

Table 1. Crystal data and structure refinement for g24fasm.

|                      |                                                |          |
|----------------------|------------------------------------------------|----------|
| Identification code  | g24fasm                                        |          |
| Empirical formula    | C <sub>21</sub> H <sub>32</sub> O <sub>2</sub> |          |
| Formula weight       | 316.47                                         |          |
| Temperature          | 193(2) K                                       |          |
| Wavelength           | 0.71073 Å                                      |          |
| Crystal system       | Orthorhombic                                   |          |
| Space group          | P 21 21 21                                     |          |
| Unit cell dimensions | a = 7.430(2) Å                                 | α = 90°. |
|                      | b = 8.883(2) Å                                 | β = 90°. |
|                      | c = 26.604(7) Å                                | γ = 90°. |

|                                   |                                             |
|-----------------------------------|---------------------------------------------|
| Volume                            | 1755.8(8) Å <sup>3</sup>                    |
| Z                                 | 4                                           |
| Density (calculated)              | 1.197 Mg/m <sup>3</sup>                     |
| Absorption coefficient            | 0.074 mm <sup>-1</sup>                      |
| F(000)                            | 696                                         |
| Crystal size                      | 0.42 x 0.31 x 0.22 mm <sup>3</sup>          |
| Theta range for data collection   | 2.42 to 25.37°.                             |
| Index ranges                      | -8<=h<=8, -10<=k<=10, -30<=l<=32            |
| Reflections collected             | 11593                                       |
| Independent reflections           | 1875 [R(int) = 0.0415]                      |
| Completeness to theta = 25.37°    | 99.8 %                                      |
| Absorption correction             | Integration                                 |
| Max. and min. transmission        | 0.9876 and 0.9629                           |
| Refinement method                 | Full-matrix least-squares on F <sup>2</sup> |
| Data / restraints / parameters    | 1875 / 0 / 213                              |
| Goodness-of-fit on F <sup>2</sup> | 1.041                                       |
| Final R indices [I>2sigma(I)]     | R1 = 0.0487, wR2 = 0.1307                   |
| R indices (all data)              | R1 = 0.0590, wR2 = 0.1401                   |
| Absolute structure parameter      | -10(10)                                     |
| Extinction coefficient            | 0.010(4)                                    |
| Largest diff. peak and hole       | 0.299 and -0.210 e.Å <sup>-3</sup>          |

Table 2. Atomic coordinates ( $\times 10^4$ ) and equivalent isotropic displacement parameters ( $\text{\AA}^2 \times 10^3$ ) for g24fasm.  $U(\text{eq})$  is defined as one third of the trace of the orthogonalized  $U^{ij}$  tensor.

|       | x        | y        | z       | $U(\text{eq})$ |
|-------|----------|----------|---------|----------------|
| C(1)  | -1420(4) | 1307(3)  | 1711(1) | 38(1)          |
| O(1)  | 2481(3)  | -1995(2) | 1896(1) | 53(1)          |
| O(2)  | 4424(3)  | -418(2)  | 1531(1) | 41(1)          |
| C(2)  | -1043(4) | -44(3)   | 2047(1) | 45(1)          |
| C(3)  | 576(4)   | 256(4)   | 2385(1) | 43(1)          |
| C(4)  | 2290(4)  | 670(3)   | 2095(1) | 35(1)          |
| C(5)  | 1855(4)  | 2046(3)  | 1750(1) | 31(1)          |
| C(6)  | 3440(4)  | 2763(3)  | 1467(1) | 37(1)          |
| C(7)  | 2904(4)  | 4337(3)  | 1289(1) | 38(1)          |
| C(8)  | 1251(4)  | 4350(3)  | 947(1)  | 32(1)          |
| C(9)  | -285(4)  | 3410(3)  | 1182(1) | 32(1)          |
| C(10) | 213(4)   | 1827(3)  | 1396(1) | 32(1)          |
| C(11) | -1948(4) | 3412(4)  | 826(1)  | 41(1)          |
| C(12) | -1743(4) | 4458(3)  | 381(1)  | 42(1)          |
| C(13) | -651(4)  | 5880(3)  | 411(1)  | 38(1)          |
| C(14) | 525(4)   | 5963(3)  | 875(1)  | 37(1)          |
| C(15) | 1617(4)  | 3879(3)  | 397(1)  | 41(1)          |
| C(16) | 47(5)    | 4544(4)  | 113(1)  | 43(1)          |
| C(17) | 3753(4)  | 1109(4)  | 2482(1) | 45(1)          |
| C(18) | 3003(4)  | -729(3)  | 1833(1) | 36(1)          |
| C(19) | 592(4)   | 627(3)   | 989(1)  | 39(1)          |
| C(20) | -1316(5) | 7303(4)  | 171(1)  | 45(1)          |
| C(21) | 5234(4)  | -1683(3) | 1282(1) | 45(1)          |



Table 3. Bond lengths [Å] and angles [°] for g24fasm.

---

|              |          |
|--------------|----------|
| C(1)-C(2)    | 1.522(4) |
| C(1)-C(10)   | 1.546(4) |
| C(1)-H(1A)   | 0.9900   |
| C(1)-H(1B)   | 0.9900   |
| O(1)-C(18)   | 1.202(3) |
| O(2)-C(18)   | 1.353(3) |
| O(2)-C(21)   | 1.437(3) |
| C(2)-C(3)    | 1.524(4) |
| C(2)-H(2A)   | 0.9900   |
| C(2)-H(2B)   | 0.9900   |
| C(3)-C(4)    | 1.533(4) |
| C(3)-H(3A)   | 0.9900   |
| C(3)-H(3B)   | 0.9900   |
| C(4)-C(18)   | 1.521(4) |
| C(4)-C(17)   | 1.548(4) |
| C(4)-C(5)    | 1.562(4) |
| C(5)-C(6)    | 1.537(4) |
| C(5)-C(10)   | 1.554(3) |
| C(5)-H(5A)   | 1.0000   |
| C(6)-C(7)    | 1.529(4) |
| C(6)-H(6A)   | 0.9900   |
| C(6)-H(6B)   | 0.9900   |
| C(7)-C(8)    | 1.528(4) |
| C(7)-H(7A)   | 0.9900   |
| C(7)-H(7B)   | 0.9900   |
| C(8)-C(14)   | 1.543(4) |
| C(8)-C(9)    | 1.545(4) |
| C(8)-C(15)   | 1.548(4) |
| C(9)-C(11)   | 1.557(4) |
| C(9)-C(10)   | 1.561(4) |
| C(9)-H(9A)   | 1.0000   |
| C(10)-C(19)  | 1.545(4) |
| C(11)-C(12)  | 1.513(4) |
| C(11)-H(11A) | 0.9900   |
| C(11)-H(11B) | 0.9900   |
| C(12)-C(13)  | 1.503(4) |

|                  |          |
|------------------|----------|
| C(12)-C(16)      | 1.511(4) |
| C(12)-H(12A)     | 1.0000   |
| C(13)-C(20)      | 1.501(4) |
| C(13)-C(14)      | 1.513(4) |
| C(13)-C(16)      | 1.520(4) |
| C(14)-H(14A)     | 0.9900   |
| C(14)-H(14B)     | 0.9900   |
| C(15)-C(16)      | 1.510(4) |
| C(15)-H(15A)     | 0.9900   |
| C(15)-H(15B)     | 0.9900   |
| C(16)-H(16A)     | 1.0000   |
| C(17)-H(17A)     | 0.9800   |
| C(17)-H(17B)     | 0.9800   |
| C(17)-H(17C)     | 0.9800   |
| C(19)-H(19A)     | 0.9800   |
| C(19)-H(19B)     | 0.9800   |
| C(19)-H(19C)     | 0.9800   |
| C(20)-H(20A)     | 0.9800   |
| C(20)-H(20B)     | 0.9800   |
| C(20)-H(20C)     | 0.9800   |
| C(21)-H(21A)     | 0.9800   |
| C(21)-H(21B)     | 0.9800   |
| C(21)-H(21C)     | 0.9800   |
| C(2)-C(1)-C(10)  | 114.2(2) |
| C(2)-C(1)-H(1A)  | 108.7    |
| C(10)-C(1)-H(1A) | 108.7    |
| C(2)-C(1)-H(1B)  | 108.7    |
| C(10)-C(1)-H(1B) | 108.7    |
| H(1A)-C(1)-H(1B) | 107.6    |
| C(18)-O(2)-C(21) | 116.1(2) |
| C(1)-C(2)-C(3)   | 110.7(3) |
| C(1)-C(2)-H(2A)  | 109.5    |
| C(3)-C(2)-H(2A)  | 109.5    |
| C(1)-C(2)-H(2B)  | 109.5    |
| C(3)-C(2)-H(2B)  | 109.5    |
| H(2A)-C(2)-H(2B) | 108.1    |
| C(2)-C(3)-C(4)   | 113.6(2) |
| C(2)-C(3)-H(3A)  | 108.8    |

|                  |            |
|------------------|------------|
| C(4)-C(3)-H(3A)  | 108.8      |
| C(2)-C(3)-H(3B)  | 108.8      |
| C(4)-C(3)-H(3B)  | 108.8      |
| H(3A)-C(3)-H(3B) | 107.7      |
| C(18)-C(4)-C(3)  | 108.9(2)   |
| C(18)-C(4)-C(17) | 105.5(2)   |
| C(3)-C(4)-C(17)  | 108.0(2)   |
| C(18)-C(4)-C(5)  | 116.2(2)   |
| C(3)-C(4)-C(5)   | 108.1(2)   |
| C(17)-C(4)-C(5)  | 109.9(2)   |
| C(6)-C(5)-C(10)  | 110.86(19) |
| C(6)-C(5)-C(4)   | 117.0(2)   |
| C(10)-C(5)-C(4)  | 114.9(2)   |
| C(6)-C(5)-H(5A)  | 104.1      |
| C(10)-C(5)-H(5A) | 104.1      |
| C(4)-C(5)-H(5A)  | 104.1      |
| C(7)-C(6)-C(5)   | 109.4(2)   |
| C(7)-C(6)-H(6A)  | 109.8      |
| C(5)-C(6)-H(6A)  | 109.8      |
| C(7)-C(6)-H(6B)  | 109.8      |
| C(5)-C(6)-H(6B)  | 109.8      |
| H(6A)-C(6)-H(6B) | 108.3      |
| C(8)-C(7)-C(6)   | 113.6(2)   |
| C(8)-C(7)-H(7A)  | 108.8      |
| C(6)-C(7)-H(7A)  | 108.8      |
| C(8)-C(7)-H(7B)  | 108.8      |
| C(6)-C(7)-H(7B)  | 108.8      |
| H(7A)-C(7)-H(7B) | 107.7      |
| C(7)-C(8)-C(14)  | 111.2(2)   |
| C(7)-C(8)-C(9)   | 110.5(2)   |
| C(14)-C(8)-C(9)  | 107.1(2)   |
| C(7)-C(8)-C(15)  | 114.9(2)   |
| C(14)-C(8)-C(15) | 101.2(2)   |
| C(9)-C(8)-C(15)  | 111.4(2)   |
| C(8)-C(9)-C(11)  | 109.9(2)   |
| C(8)-C(9)-C(10)  | 117.3(2)   |
| C(11)-C(9)-C(10) | 114.3(2)   |
| C(8)-C(9)-H(9A)  | 104.7      |

|                     |            |
|---------------------|------------|
| C(11)-C(9)-H(9A)    | 104.7      |
| C(10)-C(9)-H(9A)    | 104.7      |
| C(19)-C(10)-C(1)    | 108.5(2)   |
| C(19)-C(10)-C(5)    | 111.6(2)   |
| C(1)-C(10)-C(5)     | 108.85(19) |
| C(19)-C(10)-C(9)    | 114.2(2)   |
| C(1)-C(10)-C(9)     | 106.3(2)   |
| C(5)-C(10)-C(9)     | 107.1(2)   |
| C(12)-C(11)-C(9)    | 113.4(2)   |
| C(12)-C(11)-H(11A)  | 108.9      |
| C(9)-C(11)-H(11A)   | 108.9      |
| C(12)-C(11)-H(11B)  | 108.9      |
| C(9)-C(11)-H(11B)   | 108.9      |
| H(11A)-C(11)-H(11B) | 107.7      |
| C(13)-C(12)-C(16)   | 60.5(2)    |
| C(13)-C(12)-C(11)   | 121.9(2)   |
| C(16)-C(12)-C(11)   | 119.3(3)   |
| C(13)-C(12)-H(12A)  | 114.8      |
| C(16)-C(12)-H(12A)  | 114.8      |
| C(11)-C(12)-H(12A)  | 114.8      |
| C(20)-C(13)-C(12)   | 120.4(3)   |
| C(20)-C(13)-C(14)   | 119.8(3)   |
| C(12)-C(13)-C(14)   | 113.4(2)   |
| C(20)-C(13)-C(16)   | 123.2(2)   |
| C(12)-C(13)-C(16)   | 60.0(2)    |
| C(14)-C(13)-C(16)   | 105.5(2)   |
| C(13)-C(14)-C(8)    | 105.0(2)   |
| C(13)-C(14)-H(14A)  | 110.8      |
| C(8)-C(14)-H(14A)   | 110.8      |
| C(13)-C(14)-H(14B)  | 110.8      |
| C(8)-C(14)-H(14B)   | 110.8      |
| H(14A)-C(14)-H(14B) | 108.8      |
| C(16)-C(15)-C(8)    | 103.5(2)   |
| C(16)-C(15)-H(15A)  | 111.1      |
| C(8)-C(15)-H(15A)   | 111.1      |
| C(16)-C(15)-H(15B)  | 111.1      |
| C(8)-C(15)-H(15B)   | 111.1      |
| H(15A)-C(15)-H(15B) | 109.0      |

|                     |          |
|---------------------|----------|
| C(15)-C(16)-C(12)   | 115.0(2) |
| C(15)-C(16)-C(13)   | 107.9(2) |
| C(12)-C(16)-C(13)   | 59.5(2)  |
| C(15)-C(16)-H(16A)  | 119.8    |
| C(12)-C(16)-H(16A)  | 119.8    |
| C(13)-C(16)-H(16A)  | 119.8    |
| C(4)-C(17)-H(17A)   | 109.5    |
| C(4)-C(17)-H(17B)   | 109.5    |
| H(17A)-C(17)-H(17B) | 109.5    |
| C(4)-C(17)-H(17C)   | 109.5    |
| H(17A)-C(17)-H(17C) | 109.5    |
| H(17B)-C(17)-H(17C) | 109.5    |
| O(1)-C(18)-O(2)     | 121.7(3) |
| O(1)-C(18)-C(4)     | 126.1(3) |
| O(2)-C(18)-C(4)     | 112.1(2) |
| C(10)-C(19)-H(19A)  | 109.5    |
| C(10)-C(19)-H(19B)  | 109.5    |
| H(19A)-C(19)-H(19B) | 109.5    |
| C(10)-C(19)-H(19C)  | 109.5    |
| H(19A)-C(19)-H(19C) | 109.5    |
| H(19B)-C(19)-H(19C) | 109.5    |
| C(13)-C(20)-H(20A)  | 109.5    |
| C(13)-C(20)-H(20B)  | 109.5    |
| H(20A)-C(20)-H(20B) | 109.5    |
| C(13)-C(20)-H(20C)  | 109.5    |
| H(20A)-C(20)-H(20C) | 109.5    |
| H(20B)-C(20)-H(20C) | 109.5    |
| O(2)-C(21)-H(21A)   | 109.5    |
| O(2)-C(21)-H(21B)   | 109.5    |
| H(21A)-C(21)-H(21B) | 109.5    |
| O(2)-C(21)-H(21C)   | 109.5    |
| H(21A)-C(21)-H(21C) | 109.5    |
| H(21B)-C(21)-H(21C) | 109.5    |

---

Symmetry transformations used to generate equivalent atoms:

Table 4. Anisotropic displacement parameters ( $\text{\AA}^2 \times 10^3$ ) for g24fasm. The anisotropic displacement factor exponent takes the form:  $-2\pi^2 [ h^2 a^* U^{11} + \dots + 2 h k a^* b^* U^{12} ]$

|       | U <sup>11</sup> | U <sup>22</sup> | U <sup>33</sup> | U <sup>23</sup> | U <sup>13</sup> | U <sup>12</sup> |
|-------|-----------------|-----------------|-----------------|-----------------|-----------------|-----------------|
| C(1)  | 33(2)           | 39(2)           | 43(1)           | 7(1)            | 2(1)            | -4(1)           |
| O(1)  | 56(1)           | 33(1)           | 71(1)           | 4(1)            | 8(1)            | -3(1)           |
| O(2)  | 38(1)           | 36(1)           | 49(1)           | -3(1)           | 5(1)            | 1(1)            |
| C(2)  | 35(2)           | 47(2)           | 54(2)           | 16(2)           | 9(1)            | -2(1)           |
| C(3)  | 42(2)           | 47(2)           | 39(1)           | 12(1)           | 6(1)            | 5(2)            |
| C(4)  | 34(2)           | 35(1)           | 35(1)           | 2(1)            | -3(1)           | 1(1)            |
| C(5)  | 28(1)           | 29(1)           | 35(1)           | -1(1)           | -2(1)           | 2(1)            |
| C(6)  | 29(1)           | 36(1)           | 47(2)           | 4(1)            | -2(1)           | 1(1)            |
| C(7)  | 32(1)           | 34(1)           | 49(2)           | 4(1)            | -3(1)           | -5(1)           |
| C(8)  | 28(1)           | 30(1)           | 39(1)           | 2(1)            | 2(1)            | -1(1)           |
| C(9)  | 30(1)           | 31(1)           | 34(1)           | 0(1)            | -2(1)           | -2(1)           |
| C(10) | 30(1)           | 31(1)           | 34(1)           | 1(1)            | 1(1)            | -3(1)           |
| C(11) | 32(2)           | 42(2)           | 47(2)           | 5(1)            | -8(1)           | -3(1)           |
| C(12) | 44(2)           | 45(2)           | 37(1)           | 1(1)            | -7(1)           | -2(1)           |
| C(13) | 41(2)           | 38(2)           | 35(1)           | 3(1)            | 1(1)            | 3(1)            |
| C(14) | 36(2)           | 33(1)           | 43(2)           | 2(1)            | 0(1)            | -1(1)           |
| C(15) | 50(2)           | 33(1)           | 41(1)           | 2(1)            | 10(1)           | 4(1)            |
| C(16) | 56(2)           | 44(2)           | 29(1)           | 1(1)            | 5(1)            | 4(2)            |
| C(17) | 47(2)           | 46(2)           | 43(2)           | -1(1)           | -9(2)           | 6(2)            |
| C(18) | 33(1)           | 35(2)           | 39(1)           | 2(1)            | 0(1)            | 0(1)            |
| C(19) | 43(2)           | 32(1)           | 41(1)           | -4(1)           | -3(1)           | -2(1)           |
| C(20) | 41(2)           | 44(2)           | 52(2)           | 9(1)            | -1(2)           | 4(2)            |
| C(21) | 46(2)           | 43(2)           | 45(2)           | -8(1)           | 0(1)            | 7(2)            |

Table 5. Hydrogen coordinates ( $\times 10^4$ ) and isotropic displacement parameters ( $\text{\AA}^2 \times 10^3$ ) for g24fasm.

|        | x     | y     | z    | U(eq) |
|--------|-------|-------|------|-------|
| H(1A)  | -1824 | 2156  | 1924 | 46    |
| H(1B)  | -2419 | 1050  | 1480 | 46    |
| H(2A)  | -806  | -940  | 1836 | 54    |
| H(2B)  | -2112 | -255  | 2258 | 54    |
| H(3A)  | 816   | -654  | 2589 | 51    |
| H(3B)  | 278   | 1086  | 2618 | 51    |
| H(5A)  | 1456  | 2847  | 1990 | 37    |
| H(6A)  | 4499  | 2831  | 1692 | 45    |
| H(6B)  | 3769  | 2132  | 1175 | 45    |
| H(7A)  | 2658  | 4974  | 1587 | 46    |
| H(7B)  | 3930  | 4789  | 1106 | 46    |
| H(9A)  | -678  | 4003  | 1482 | 38    |
| H(11A) | -2151 | 2376  | 701  | 49    |
| H(11B) | -3024 | 3715  | 1020 | 49    |
| H(12A) | -2820 | 4518  | 156  | 51    |
| H(14A) | -186  | 6283  | 1171 | 45    |
| H(14B) | 1526  | 6683  | 825  | 45    |
| H(15A) | 2772  | 4298  | 275  | 50    |
| H(15B) | 1644  | 2770  | 362  | 50    |
| H(16A) | 83    | 4594  | -263 | 52    |
| H(17A) | 3945  | 271   | 2716 | 68    |
| H(17B) | 3360  | 1999  | 2670 | 68    |
| H(17C) | 4880  | 1334  | 2306 | 68    |
| H(19A) | 533   | -378  | 1140 | 58    |
| H(19B) | 1794  | 790   | 847  | 58    |
| H(19C) | -310  | 707   | 721  | 58    |
| H(20A) | -1916 | 7061  | -147 | 68    |
| H(20B) | -296  | 7975  | 106  | 68    |
| H(20C) | -2171 | 7802  | 396  | 68    |
| H(21A) | 6306  | -1349 | 1099 | 67    |
| H(21B) | 4370  | -2122 | 1046 | 67    |
| H(21C) | 5579  | -2440 | 1532 | 67    |

Table 6. Torsion angles [°] for g24fasm.

---

|                        |           |
|------------------------|-----------|
| C(10)-C(1)-C(2)-C(3)   | 54.4(3)   |
| C(1)-C(2)-C(3)-C(4)    | -56.4(4)  |
| C(2)-C(3)-C(4)-C(18)   | -72.0(3)  |
| C(2)-C(3)-C(4)-C(17)   | 173.9(2)  |
| C(2)-C(3)-C(4)-C(5)    | 55.1(3)   |
| C(18)-C(4)-C(5)-C(6)   | -63.8(3)  |
| C(3)-C(4)-C(5)-C(6)    | 173.5(2)  |
| C(17)-C(4)-C(5)-C(6)   | 55.8(3)   |
| C(18)-C(4)-C(5)-C(10)  | 68.9(3)   |
| C(3)-C(4)-C(5)-C(10)   | -53.9(3)  |
| C(17)-C(4)-C(5)-C(10)  | -171.5(2) |
| C(10)-C(5)-C(6)-C(7)   | 63.3(3)   |
| C(4)-C(5)-C(6)-C(7)    | -162.3(2) |
| C(5)-C(6)-C(7)-C(8)    | -58.3(3)  |
| C(6)-C(7)-C(8)-C(14)   | 167.5(2)  |
| C(6)-C(7)-C(8)-C(9)    | 48.7(3)   |
| C(6)-C(7)-C(8)-C(15)   | -78.4(3)  |
| C(7)-C(8)-C(9)-C(11)   | -179.1(2) |
| C(14)-C(8)-C(9)-C(11)  | 59.6(3)   |
| C(15)-C(8)-C(9)-C(11)  | -50.2(3)  |
| C(7)-C(8)-C(9)-C(10)   | -46.4(3)  |
| C(14)-C(8)-C(9)-C(10)  | -167.7(2) |
| C(15)-C(8)-C(9)-C(10)  | 82.5(3)   |
| C(2)-C(1)-C(10)-C(19)  | 70.0(3)   |
| C(2)-C(1)-C(10)-C(5)   | -51.7(3)  |
| C(2)-C(1)-C(10)-C(9)   | -166.8(2) |
| C(6)-C(5)-C(10)-C(19)  | 67.9(3)   |
| C(4)-C(5)-C(10)-C(19)  | -67.6(3)  |
| C(6)-C(5)-C(10)-C(1)   | -172.4(2) |
| C(4)-C(5)-C(10)-C(1)   | 52.1(3)   |
| C(6)-C(5)-C(10)-C(9)   | -57.8(3)  |
| C(4)-C(5)-C(10)-C(9)   | 166.7(2)  |
| C(8)-C(9)-C(10)-C(19)  | -73.4(3)  |
| C(11)-C(9)-C(10)-C(19) | 57.4(3)   |
| C(8)-C(9)-C(10)-C(1)   | 167.0(2)  |
| C(11)-C(9)-C(10)-C(1)  | -62.2(3)  |



|                         |           |
|-------------------------|-----------|
| C(8)-C(9)-C(10)-C(5)    | 50.8(3)   |
| C(11)-C(9)-C(10)-C(5)   | -178.5(2) |
| C(8)-C(9)-C(11)-C(12)   | -6.9(3)   |
| C(10)-C(9)-C(11)-C(12)  | -141.1(2) |
| C(9)-C(11)-C(12)-C(13)  | -30.8(4)  |
| C(9)-C(11)-C(12)-C(16)  | 40.8(4)   |
| C(16)-C(12)-C(13)-C(20) | 113.1(3)  |
| C(11)-C(12)-C(13)-C(20) | -138.8(3) |
| C(16)-C(12)-C(13)-C(14) | -95.0(3)  |
| C(11)-C(12)-C(13)-C(14) | 13.1(4)   |
| C(11)-C(12)-C(13)-C(16) | 108.1(3)  |
| C(20)-C(13)-C(14)-C(8)  | -168.7(3) |
| C(12)-C(13)-C(14)-C(8)  | 39.2(3)   |
| C(16)-C(13)-C(14)-C(8)  | -24.3(3)  |
| C(7)-C(8)-C(14)-C(13)   | 161.7(2)  |
| C(9)-C(8)-C(14)-C(13)   | -77.5(3)  |
| C(15)-C(8)-C(14)-C(13)  | 39.3(3)   |
| C(7)-C(8)-C(15)-C(16)   | -158.9(2) |
| C(14)-C(8)-C(15)-C(16)  | -39.0(3)  |
| C(9)-C(8)-C(15)-C(16)   | 74.5(3)   |
| C(8)-C(15)-C(16)-C(12)  | -38.8(3)  |
| C(8)-C(15)-C(16)-C(13)  | 25.2(3)   |
| C(13)-C(12)-C(16)-C(15) | 96.8(3)   |
| C(11)-C(12)-C(16)-C(15) | -15.4(4)  |
| C(11)-C(12)-C(16)-C(13) | -112.2(3) |
| C(20)-C(13)-C(16)-C(15) | 142.2(3)  |
| C(12)-C(13)-C(16)-C(15) | -109.0(3) |
| C(14)-C(13)-C(16)-C(15) | -0.7(3)   |
| C(20)-C(13)-C(16)-C(12) | -108.8(3) |
| C(14)-C(13)-C(16)-C(12) | 108.4(3)  |
| C(21)-O(2)-C(18)-O(1)   | 1.6(4)    |
| C(21)-O(2)-C(18)-C(4)   | 177.7(2)  |
| C(3)-C(4)-C(18)-O(1)    | -9.8(4)   |
| C(17)-C(4)-C(18)-O(1)   | 105.9(3)  |
| C(5)-C(4)-C(18)-O(1)    | -132.2(3) |
| C(3)-C(4)-C(18)-O(2)    | 174.3(2)  |
| C(17)-C(4)-C(18)-O(2)   | -70.0(3)  |
| C(5)-C(4)-C(18)-O(2)    | 51.9(3)   |

---

Symmetry transformations used to generate equivalent atoms:

**ORTEP figure and Tables of crystal data, atomic coordinates, bond angles and bond lengths, and anisotropic displacement parameters from the X-ray crystal structure determination of azatrachylobane picrate salt (24, ID code No. g61eam)**

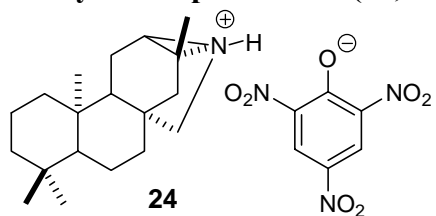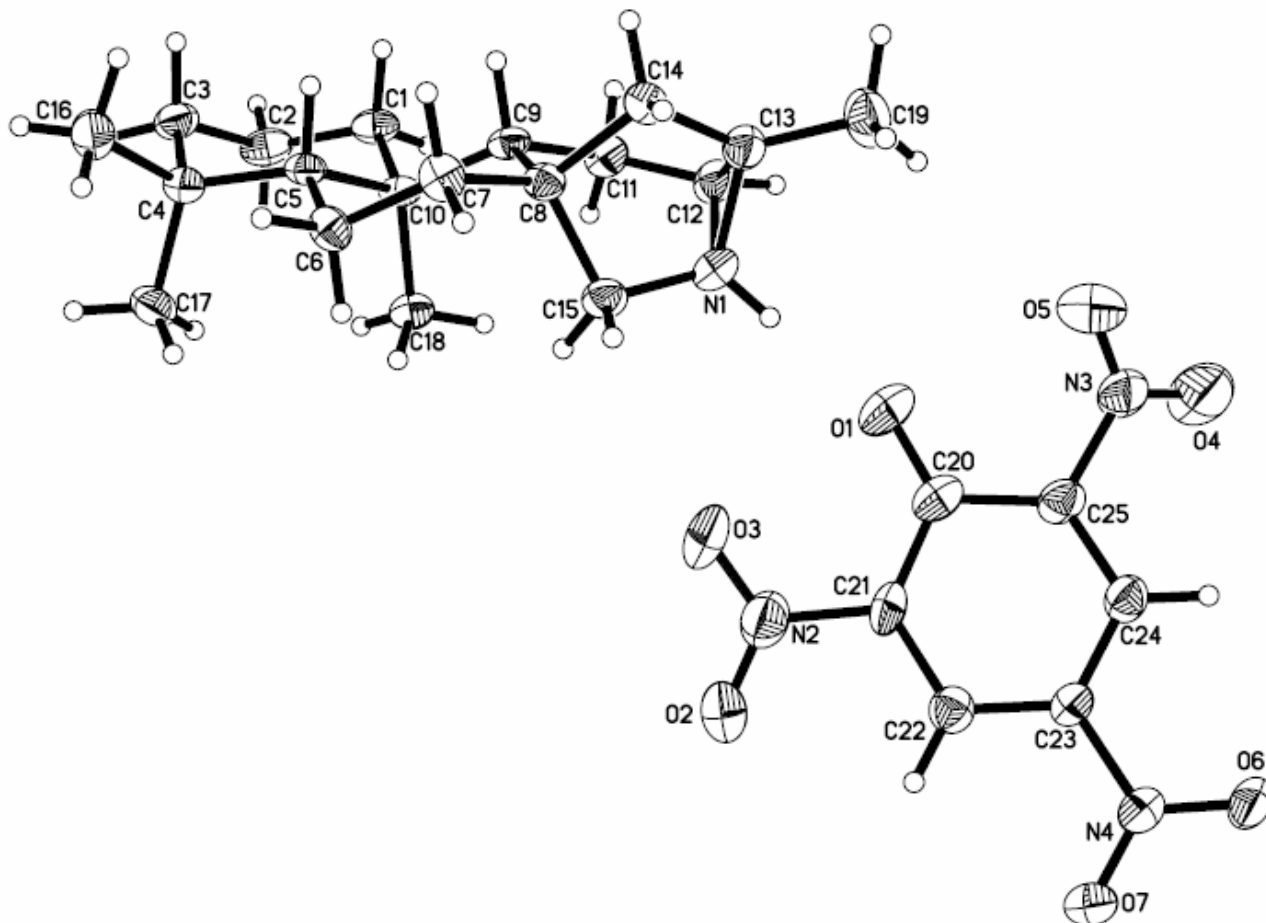

Table 1. Crystal data and structure refinement for g61eam.

|                     |                                                               |
|---------------------|---------------------------------------------------------------|
| Identification code | g61eam                                                        |
| Empirical formula   | C <sub>25</sub> H <sub>34</sub> N <sub>4</sub> O <sub>7</sub> |
| Formula weight      | 502.56                                                        |
| Temperature         | 193(2) K                                                      |
| Wavelength          | 0.71073 Å                                                     |
| Crystal system      | Monoclinic                                                    |
| Space group         | P 21                                                          |

|                                   |                                             |                              |
|-----------------------------------|---------------------------------------------|------------------------------|
| Unit cell dimensions              | a = 10.701(5) Å                             | $\alpha = 90^\circ$ .        |
|                                   | b = 7.179(3) Å                              | $\beta = 104.052(7)^\circ$ . |
|                                   | c = 16.525(8) Å                             | $\gamma = 90^\circ$ .        |
| Volume                            | 1231.5(10) Å <sup>3</sup>                   |                              |
| Z                                 | 2                                           |                              |
| Density (calculated)              | 1.355 Mg/m <sup>3</sup>                     |                              |
| Absorption coefficient            | 0.100 mm <sup>-1</sup>                      |                              |
| F(000)                            | 536                                         |                              |
| Crystal size                      | 0.60 x 0.20 x 0.12 mm <sup>3</sup>          |                              |
| Theta range for data collection   | 1.96 to 25.30°.                             |                              |
| Index ranges                      | -12 ≤ h ≤ 12, -8 ≤ k ≤ 8, -19 ≤ l ≤ 19      |                              |
| Reflections collected             | 9799                                        |                              |
| Independent reflections           | 2444 [R(int) = 0.0577]                      |                              |
| Completeness to theta = 25.30°    | 100.0 %                                     |                              |
| Absorption correction             | Numerical                                   |                              |
| Max. and min. transmission        | 0.99021 and 0.95830                         |                              |
| Refinement method                 | Full-matrix least-squares on F <sup>2</sup> |                              |
| Data / restraints / parameters    | 2444 / 1 / 332                              |                              |
| Goodness-of-fit on F <sup>2</sup> | 1.028                                       |                              |
| Final R indices [I > 2σ(I)]       | R1 = 0.0443, wR2 = 0.1036                   |                              |
| R indices (all data)              | R1 = 0.0687, wR2 = 0.1120                   |                              |
| Absolute structure parameter      | 10(10)                                      |                              |
| Largest diff. peak and hole       | 0.216 and -0.183 e.Å <sup>-3</sup>          |                              |

Table 2. Atomic coordinates ( $\times 10^4$ ) and equivalent isotropic displacement parameters ( $\text{\AA}^2 \times 10^3$ ) for g61eam.  $U(\text{eq})$  is defined as one third of the trace of the orthogonalized  $U^{ij}$  tensor.

|       | x       | y       | z        | $U(\text{eq})$ |
|-------|---------|---------|----------|----------------|
| O(1)  | 6859(3) | 6807(4) | 9415(2)  | 64(1)          |
| C(1)  | 8830(3) | 4507(5) | 5394(2)  | 38(1)          |
| N(1)  | 7871(3) | 7207(5) | 8115(2)  | 44(1)          |
| O(2)  | 3022(3) | 6679(6) | 8257(2)  | 86(1)          |
| N(2)  | 4139(4) | 7167(6) | 8540(2)  | 66(1)          |
| C(2)  | 8310(3) | 3887(6) | 4490(2)  | 46(1)          |
| N(3)  | 7682(3) | 7465(8) | 11124(2) | 69(1)          |
| C(3)  | 8112(3) | 5548(5) | 3896(2)  | 43(1)          |
| O(3)  | 4837(3) | 7637(9) | 8094(2)  | 115(2)         |
| N(4)  | 3191(3) | 7623(5) | 11265(2) | 47(1)          |
| C(4)  | 7214(3) | 7052(5) | 4104(2)  | 37(1)          |
| O(4)  | 8024(3) | 6573(8) | 11759(2) | 117(2)         |
| C(5)  | 7704(3) | 7578(5) | 5049(2)  | 32(1)          |
| O(5)  | 8389(3) | 8459(7) | 10832(2) | 97(1)          |
| O(6)  | 3584(2) | 7794(5) | 12028(2) | 65(1)          |
| C(6)  | 6933(3) | 9124(5) | 5345(2)  | 37(1)          |
| O(7)  | 2044(2) | 7589(5) | 10911(2) | 64(1)          |
| C(7)  | 7709(3) | 9934(5) | 6169(2)  | 39(1)          |
| C(8)  | 8157(3) | 8497(5) | 6855(2)  | 33(1)          |
| C(9)  | 8734(3) | 6756(5) | 6533(2)  | 32(1)          |
| C(10) | 7950(3) | 5946(4) | 5681(2)  | 30(1)          |
| C(11) | 9100(4) | 5304(5) | 7249(2)  | 41(1)          |
| C(12) | 9031(3) | 6052(6) | 8091(2)  | 44(1)          |
| C(13) | 9204(3) | 8035(6) | 8304(2)  | 44(1)          |
| C(14) | 9190(3) | 9332(5) | 7586(2)  | 40(1)          |
| C(15) | 7118(3) | 7943(6) | 7309(2)  | 39(1)          |
| C(16) | 7297(4) | 8778(6) | 3565(2)  | 51(1)          |
| C(17) | 5811(3) | 6356(6) | 3857(2)  | 47(1)          |
| C(18) | 6696(3) | 4955(5) | 5759(2)  | 37(1)          |
| C(19) | 9793(4) | 8664(7) | 9190(2)  | 62(1)          |
| C(20) | 5997(4) | 7149(6) | 9792(2)  | 47(1)          |
| C(21) | 4629(4) | 7219(6) | 9440(2)  | 44(1)          |
| C(22) | 3714(3) | 7336(6) | 9908(2)  | 44(1)          |

|       |         |         |          |       |
|-------|---------|---------|----------|-------|
| C(23) | 4128(3) | 7444(6) | 10772(2) | 39(1) |
| C(24) | 5433(3) | 7462(6) | 11157(2) | 45(1) |
| C(25) | 6313(3) | 7375(6) | 10687(2) | 45(1) |

---

Table 3. Bond lengths [Å] and angles [°] for g61eam.

---

|            |          |
|------------|----------|
| O(1)-C(20) | 1.256(4) |
| C(1)-C(2)  | 1.528(5) |
| C(1)-C(10) | 1.547(4) |
| C(1)-H(1A) | 0.9900   |
| C(1)-H(1B) | 0.9900   |
| N(1)-C(15) | 1.477(5) |
| N(1)-C(12) | 1.501(5) |
| N(1)-C(13) | 1.507(5) |
| N(1)-H(1)  | 0.87(4)  |
| O(2)-N(2)  | 1.225(4) |
| N(2)-O(3)  | 1.218(5) |
| N(2)-C(21) | 1.452(5) |
| C(2)-C(3)  | 1.527(5) |
| C(2)-H(2A) | 0.9900   |
| C(2)-H(2B) | 0.9900   |
| N(3)-O(4)  | 1.207(5) |
| N(3)-O(5)  | 1.221(5) |
| N(3)-C(25) | 1.469(5) |
| C(3)-C(4)  | 1.538(5) |
| C(3)-H(3A) | 0.9900   |
| C(3)-H(3B) | 0.9900   |
| N(4)-O(7)  | 1.225(4) |
| N(4)-O(6)  | 1.235(4) |
| N(4)-C(23) | 1.443(4) |
| C(4)-C(17) | 1.540(4) |
| C(4)-C(16) | 1.541(5) |
| C(4)-C(5)  | 1.569(5) |
| C(5)-C(6)  | 1.532(5) |
| C(5)-C(10) | 1.549(5) |
| C(5)-H(5A) | 1.0000   |
| C(6)-C(7)  | 1.528(5) |
| C(6)-H(6A) | 0.9900   |
| C(6)-H(6B) | 0.9900   |
| C(7)-C(8)  | 1.522(5) |
| C(7)-H(7A) | 0.9900   |
| C(7)-H(7B) | 0.9900   |

|              |          |
|--------------|----------|
| C(8)-C(15)   | 1.536(5) |
| C(8)-C(9)    | 1.545(5) |
| C(8)-C(14)   | 1.546(5) |
| C(9)-C(11)   | 1.553(5) |
| C(9)-C(10)   | 1.566(5) |
| C(9)-H(9A)   | 1.0000   |
| C(10)-C(18)  | 1.552(4) |
| C(11)-C(12)  | 1.511(5) |
| C(11)-H(11A) | 0.9900   |
| C(11)-H(11B) | 0.9900   |
| C(12)-C(13)  | 1.467(6) |
| C(12)-H(12A) | 1.0000   |
| C(13)-C(14)  | 1.505(5) |
| C(13)-C(19)  | 1.516(5) |
| C(14)-H(14A) | 0.9900   |
| C(14)-H(14B) | 0.9900   |
| C(15)-H(15A) | 0.9900   |
| C(15)-H(15B) | 0.9900   |
| C(16)-H(16A) | 0.9800   |
| C(16)-H(16B) | 0.9800   |
| C(16)-H(16C) | 0.9800   |
| C(17)-H(17A) | 0.9800   |
| C(17)-H(17B) | 0.9800   |
| C(17)-H(17C) | 0.9800   |
| C(18)-H(18A) | 0.9800   |
| C(18)-H(18B) | 0.9800   |
| C(18)-H(18C) | 0.9800   |
| C(19)-H(19A) | 0.9800   |
| C(19)-H(19B) | 0.9800   |
| C(19)-H(19C) | 0.9800   |
| C(20)-C(21)  | 1.439(5) |
| C(20)-C(25)  | 1.443(5) |
| C(21)-C(22)  | 1.390(5) |
| C(22)-C(23)  | 1.390(4) |
| C(22)-H(22A) | 0.9500   |
| C(23)-C(24)  | 1.387(5) |
| C(24)-C(25)  | 1.360(4) |
| C(24)-H(24A) | 0.9500   |



|                  |          |
|------------------|----------|
| C(2)-C(1)-C(10)  | 112.9(3) |
| C(2)-C(1)-H(1A)  | 109.0    |
| C(10)-C(1)-H(1A) | 109.0    |
| C(2)-C(1)-H(1B)  | 109.0    |
| C(10)-C(1)-H(1B) | 109.0    |
| H(1A)-C(1)-H(1B) | 107.8    |
| C(15)-N(1)-C(12) | 116.6(3) |
| C(15)-N(1)-C(13) | 109.1(3) |
| C(12)-N(1)-C(13) | 58.4(2)  |
| C(15)-N(1)-H(1)  | 120(3)   |
| C(12)-N(1)-H(1)  | 120(3)   |
| C(13)-N(1)-H(1)  | 117(3)   |
| O(3)-N(2)-O(2)   | 122.2(4) |
| O(3)-N(2)-C(21)  | 119.4(4) |
| O(2)-N(2)-C(21)  | 118.4(3) |
| C(3)-C(2)-C(1)   | 111.2(3) |
| C(3)-C(2)-H(2A)  | 109.4    |
| C(1)-C(2)-H(2A)  | 109.4    |
| C(3)-C(2)-H(2B)  | 109.4    |
| C(1)-C(2)-H(2B)  | 109.4    |
| H(2A)-C(2)-H(2B) | 108.0    |
| O(4)-N(3)-O(5)   | 124.5(4) |
| O(4)-N(3)-C(25)  | 117.4(4) |
| O(5)-N(3)-C(25)  | 118.1(4) |
| C(2)-C(3)-C(4)   | 113.6(3) |
| C(2)-C(3)-H(3A)  | 108.8    |
| C(4)-C(3)-H(3A)  | 108.8    |
| C(2)-C(3)-H(3B)  | 108.8    |
| C(4)-C(3)-H(3B)  | 108.8    |
| H(3A)-C(3)-H(3B) | 107.7    |
| O(7)-N(4)-O(6)   | 122.9(3) |
| O(7)-N(4)-C(23)  | 118.7(3) |
| O(6)-N(4)-C(23)  | 118.4(3) |
| C(3)-C(4)-C(17)  | 109.6(3) |
| C(3)-C(4)-C(16)  | 108.0(3) |
| C(17)-C(4)-C(16) | 107.3(3) |
| C(3)-C(4)-C(5)   | 108.4(3) |

|                  |          |
|------------------|----------|
| C(17)-C(4)-C(5)  | 114.2(3) |
| C(16)-C(4)-C(5)  | 109.2(3) |
| C(6)-C(5)-C(10)  | 110.5(2) |
| C(6)-C(5)-C(4)   | 114.6(3) |
| C(10)-C(5)-C(4)  | 116.7(3) |
| C(6)-C(5)-H(5A)  | 104.5    |
| C(10)-C(5)-H(5A) | 104.5    |
| C(4)-C(5)-H(5A)  | 104.5    |
| C(7)-C(6)-C(5)   | 110.0(3) |
| C(7)-C(6)-H(6A)  | 109.7    |
| C(5)-C(6)-H(6A)  | 109.7    |
| C(7)-C(6)-H(6B)  | 109.7    |
| C(5)-C(6)-H(6B)  | 109.7    |
| H(6A)-C(6)-H(6B) | 108.2    |
| C(8)-C(7)-C(6)   | 114.3(3) |
| C(8)-C(7)-H(7A)  | 108.7    |
| C(6)-C(7)-H(7A)  | 108.7    |
| C(8)-C(7)-H(7B)  | 108.7    |
| C(6)-C(7)-H(7B)  | 108.7    |
| H(7A)-C(7)-H(7B) | 107.6    |
| C(7)-C(8)-C(15)  | 113.9(3) |
| C(7)-C(8)-C(9)   | 111.8(3) |
| C(15)-C(8)-C(9)  | 110.8(3) |
| C(7)-C(8)-C(14)  | 110.8(3) |
| C(15)-C(8)-C(14) | 100.6(3) |
| C(9)-C(8)-C(14)  | 108.2(3) |
| C(8)-C(9)-C(11)  | 109.2(3) |
| C(8)-C(9)-C(10)  | 116.0(3) |
| C(11)-C(9)-C(10) | 114.6(3) |
| C(8)-C(9)-H(9A)  | 105.3    |
| C(11)-C(9)-H(9A) | 105.3    |
| C(10)-C(9)-H(9A) | 105.3    |
| C(1)-C(10)-C(5)  | 108.4(3) |
| C(1)-C(10)-C(18) | 108.8(3) |
| C(5)-C(10)-C(18) | 113.2(3) |
| C(1)-C(10)-C(9)  | 106.9(2) |
| C(5)-C(10)-C(9)  | 106.9(3) |
| C(18)-C(10)-C(9) | 112.3(3) |

|                     |          |
|---------------------|----------|
| C(12)-C(11)-C(9)    | 113.8(3) |
| C(12)-C(11)-H(11A)  | 108.8    |
| C(9)-C(11)-H(11A)   | 108.8    |
| C(12)-C(11)-H(11B)  | 108.8    |
| C(9)-C(11)-H(11B)   | 108.8    |
| H(11A)-C(11)-H(11B) | 107.7    |
| C(13)-C(12)-N(1)    | 61.0(2)  |
| C(13)-C(12)-C(11)   | 122.3(3) |
| N(1)-C(12)-C(11)    | 116.5(3) |
| C(13)-C(12)-H(12A)  | 115.3    |
| N(1)-C(12)-H(12A)   | 115.3    |
| C(11)-C(12)-H(12A)  | 115.3    |
| C(12)-C(13)-C(14)   | 115.8(3) |
| C(12)-C(13)-N(1)    | 60.6(3)  |
| C(14)-C(13)-N(1)    | 104.6(3) |
| C(12)-C(13)-C(19)   | 121.3(4) |
| C(14)-C(13)-C(19)   | 120.0(4) |
| N(1)-C(13)-C(19)    | 117.9(3) |
| C(13)-C(14)-C(8)    | 104.2(3) |
| C(13)-C(14)-H(14A)  | 110.9    |
| C(8)-C(14)-H(14A)   | 110.9    |
| C(13)-C(14)-H(14B)  | 110.9    |
| C(8)-C(14)-H(14B)   | 110.9    |
| H(14A)-C(14)-H(14B) | 108.9    |
| N(1)-C(15)-C(8)     | 103.4(3) |
| N(1)-C(15)-H(15A)   | 111.1    |
| C(8)-C(15)-H(15A)   | 111.1    |
| N(1)-C(15)-H(15B)   | 111.1    |
| C(8)-C(15)-H(15B)   | 111.1    |
| H(15A)-C(15)-H(15B) | 109.0    |
| C(4)-C(16)-H(16A)   | 109.5    |
| C(4)-C(16)-H(16B)   | 109.5    |
| H(16A)-C(16)-H(16B) | 109.5    |
| C(4)-C(16)-H(16C)   | 109.5    |
| H(16A)-C(16)-H(16C) | 109.5    |
| H(16B)-C(16)-H(16C) | 109.5    |
| C(4)-C(17)-H(17A)   | 109.5    |
| C(4)-C(17)-H(17B)   | 109.5    |

|                     |          |
|---------------------|----------|
| H(17A)-C(17)-H(17B) | 109.5    |
| C(4)-C(17)-H(17C)   | 109.5    |
| H(17A)-C(17)-H(17C) | 109.5    |
| H(17B)-C(17)-H(17C) | 109.5    |
| C(10)-C(18)-H(18A)  | 109.5    |
| C(10)-C(18)-H(18B)  | 109.5    |
| H(18A)-C(18)-H(18B) | 109.5    |
| C(10)-C(18)-H(18C)  | 109.5    |
| H(18A)-C(18)-H(18C) | 109.5    |
| H(18B)-C(18)-H(18C) | 109.5    |
| C(13)-C(19)-H(19A)  | 109.5    |
| C(13)-C(19)-H(19B)  | 109.5    |
| H(19A)-C(19)-H(19B) | 109.5    |
| C(13)-C(19)-H(19C)  | 109.5    |
| H(19A)-C(19)-H(19C) | 109.5    |
| H(19B)-C(19)-H(19C) | 109.5    |
| O(1)-C(20)-C(21)    | 127.1(4) |
| O(1)-C(20)-C(25)    | 120.8(3) |
| C(21)-C(20)-C(25)   | 111.9(3) |
| C(22)-C(21)-C(20)   | 124.2(3) |
| C(22)-C(21)-N(2)    | 116.3(3) |
| C(20)-C(21)-N(2)    | 119.5(3) |
| C(21)-C(22)-C(23)   | 118.9(3) |
| C(21)-C(22)-H(22A)  | 120.6    |
| C(23)-C(22)-H(22A)  | 120.6    |
| C(24)-C(23)-C(22)   | 120.4(3) |
| C(24)-C(23)-N(4)    | 120.0(3) |
| C(22)-C(23)-N(4)    | 119.6(3) |
| C(25)-C(24)-C(23)   | 119.8(3) |
| C(25)-C(24)-H(24A)  | 120.1    |
| C(23)-C(24)-H(24A)  | 120.1    |
| C(24)-C(25)-C(20)   | 124.6(3) |
| C(24)-C(25)-N(3)    | 117.5(3) |
| C(20)-C(25)-N(3)    | 117.8(3) |

---

Symmetry transformations used to generate equivalent atoms:

Table 4. Anisotropic displacement parameters ( $\text{\AA}^2 \times 10^3$ ) for g61eam. The anisotropic displacement factor exponent takes the form:  $-2\pi^2 [ h^2 a^*^2 U^{11} + \dots + 2 h k a^* b^* U^{12} ]$

|       | U <sup>11</sup> | U <sup>22</sup> | U <sup>33</sup> | U <sup>23</sup> | U <sup>13</sup> | U <sup>12</sup> |
|-------|-----------------|-----------------|-----------------|-----------------|-----------------|-----------------|
| O(1)  | 70(2)           | 68(2)           | 66(2)           | -5(2)           | 42(2)           | 4(2)            |
| C(1)  | 31(2)           | 29(2)           | 57(2)           | 1(2)            | 16(2)           | 2(2)            |
| N(1)  | 46(2)           | 46(2)           | 45(2)           | 3(2)            | 23(1)           | 0(2)            |
| O(2)  | 75(2)           | 133(3)          | 44(2)           | -7(2)           | 6(2)            | -12(2)          |
| N(2)  | 73(2)           | 76(3)           | 50(2)           | -10(2)          | 22(2)           | -13(2)          |
| C(2)  | 39(2)           | 39(2)           | 68(3)           | -6(2)           | 28(2)           | 5(2)            |
| N(3)  | 44(2)           | 113(4)          | 54(2)           | -1(3)           | 18(2)           | 22(2)           |
| C(3)  | 36(2)           | 50(2)           | 46(2)           | -3(2)           | 18(2)           | -3(2)           |
| O(3)  | 100(2)          | 212(5)          | 43(2)           | 1(3)            | 32(2)           | -34(3)          |
| N(4)  | 47(2)           | 54(2)           | 44(2)           | -1(2)           | 19(2)           | 1(2)            |
| C(4)  | 31(2)           | 42(2)           | 38(2)           | -1(2)           | 8(2)            | -5(2)           |
| O(4)  | 65(2)           | 209(5)          | 76(2)           | 46(3)           | 19(2)           | 64(3)           |
| C(5)  | 23(2)           | 32(2)           | 41(2)           | 4(2)            | 8(1)            | -4(2)           |
| O(5)  | 51(2)           | 142(4)          | 100(3)          | -7(3)           | 23(2)           | -9(2)           |
| O(6)  | 57(2)           | 106(3)          | 36(2)           | 4(2)            | 17(1)           | 18(2)           |
| C(6)  | 37(2)           | 31(2)           | 39(2)           | 3(2)            | 3(2)            | 4(2)            |
| O(7)  | 40(2)           | 95(2)           | 61(2)           | -13(2)          | 19(1)           | -7(2)           |
| C(7)  | 43(2)           | 28(2)           | 43(2)           | 1(2)            | 7(2)            | 5(2)            |
| C(8)  | 31(2)           | 29(2)           | 38(2)           | 4(2)            | 8(1)            | -3(2)           |
| C(9)  | 25(2)           | 31(2)           | 43(2)           | 8(2)            | 13(2)           | 4(1)            |
| C(10) | 22(2)           | 25(2)           | 43(2)           | 3(2)            | 11(1)           | 1(1)            |
| C(11) | 43(2)           | 36(2)           | 45(2)           | 9(2)            | 15(2)           | 8(2)            |
| C(12) | 43(2)           | 52(3)           | 38(2)           | 16(2)           | 12(2)           | 8(2)            |
| C(13) | 41(2)           | 52(3)           | 38(2)           | 6(2)            | 11(2)           | 5(2)            |
| C(14) | 35(2)           | 44(2)           | 40(2)           | 1(2)            | 6(2)            | -3(2)           |
| C(15) | 34(2)           | 43(2)           | 44(2)           | -2(2)           | 14(2)           | 4(2)            |
| C(16) | 52(2)           | 57(3)           | 41(2)           | 4(2)            | 6(2)            | -6(2)           |
| C(17) | 33(2)           | 60(3)           | 46(2)           | -8(2)           | 3(2)            | -4(2)           |
| C(18) | 35(2)           | 30(2)           | 48(2)           | 0(2)            | 15(2)           | 0(2)            |
| C(19) | 61(3)           | 74(3)           | 44(2)           | 3(2)            | 1(2)            | 10(2)           |
| C(20) | 54(2)           | 40(2)           | 55(2)           | -1(2)           | 28(2)           | 2(2)            |
| C(21) | 65(2)           | 40(2)           | 29(2)           | -7(2)           | 18(2)           | -6(2)           |
| C(22) | 46(2)           | 42(2)           | 43(2)           | -2(2)           | 12(2)           | -2(2)           |

|       |       |       |       |      |       |       |
|-------|-------|-------|-------|------|-------|-------|
| C(23) | 42(2) | 40(2) | 37(2) | 1(2) | 16(2) | 4(2)  |
| C(24) | 47(2) | 50(2) | 38(2) | 3(2) | 12(2) | 11(2) |
| C(25) | 43(2) | 47(2) | 48(2) | 0(2) | 18(2) | 11(2) |

---

Table 5. Hydrogen coordinates ( $\times 10^4$ ) and isotropic displacement parameters ( $\text{\AA}^2 \times 10^3$ ) for g61eam.

|        | x        | y        | z        | U(eq) |
|--------|----------|----------|----------|-------|
| H(1A)  | 9696     | 5059     | 5455     | 46    |
| H(1B)  | 8924     | 3402     | 5762     | 46    |
| H(1)   | 7510(40) | 7090(70) | 8530(30) | 65    |
| H(2A)  | 8922     | 3003     | 4336     | 55    |
| H(2B)  | 7479     | 3233     | 4437     | 55    |
| H(3A)  | 7749     | 5097     | 3321     | 51    |
| H(3B)  | 8960     | 6118     | 3912     | 51    |
| H(5A)  | 8574     | 8136     | 5094     | 38    |
| H(6A)  | 6733     | 10120    | 4918     | 44    |
| H(6B)  | 6109     | 8614     | 5420     | 44    |
| H(7A)  | 8474     | 10582    | 6068     | 46    |
| H(7B)  | 7175     | 10875    | 6366     | 46    |
| H(9A)  | 9571     | 7179     | 6429     | 39    |
| H(11A) | 8514     | 4222     | 7110     | 49    |
| H(11B) | 9987     | 4858     | 7283     | 49    |
| H(12A) | 9320     | 5171     | 8569     | 53    |
| H(14A) | 10042    | 9364     | 7452     | 48    |
| H(14B) | 8953     | 10611    | 7716     | 48    |
| H(15A) | 6599     | 9036     | 7392     | 47    |
| H(15B) | 6538     | 6978     | 6993     | 47    |
| H(16A) | 7221     | 8391     | 2986     | 76    |
| H(16B) | 8127     | 9401     | 3778     | 76    |
| H(16C) | 6596     | 9639     | 3587     | 76    |
| H(17A) | 5508     | 6342     | 3248     | 71    |
| H(17B) | 5266     | 7190     | 4092     | 71    |
| H(17C) | 5767     | 5094     | 4075     | 71    |
| H(18A) | 6005     | 5875     | 5708     | 55    |
| H(18B) | 6844     | 4339     | 6304     | 55    |
| H(18C) | 6448     | 4024     | 5316     | 55    |
| H(19A) | 9616     | 7734     | 9582     | 93    |
| H(19B) | 9418     | 9862     | 9290     | 93    |
| H(19C) | 10727    | 8803     | 9271     | 93    |

|        |      |      |       |    |
|--------|------|------|-------|----|
| H(22A) | 2821 | 7342 | 9642  | 52 |
| H(24A) | 5711 | 7535 | 11748 | 53 |

---



Table 6. Torsion angles [°] for g61eam.

---

|                       |           |
|-----------------------|-----------|
| C(10)-C(1)-C(2)-C(3)  | 57.2(4)   |
| C(1)-C(2)-C(3)-C(4)   | -56.7(4)  |
| C(2)-C(3)-C(4)-C(17)  | -73.6(4)  |
| C(2)-C(3)-C(4)-C(16)  | 169.9(3)  |
| C(2)-C(3)-C(4)-C(5)   | 51.6(4)   |
| C(3)-C(4)-C(5)-C(6)   | 177.8(3)  |
| C(17)-C(4)-C(5)-C(6)  | -59.8(4)  |
| C(16)-C(4)-C(5)-C(6)  | 60.4(4)   |
| C(3)-C(4)-C(5)-C(10)  | -50.8(3)  |
| C(17)-C(4)-C(5)-C(10) | 71.7(4)   |
| C(16)-C(4)-C(5)-C(10) | -168.2(3) |
| C(10)-C(5)-C(6)-C(7)  | 63.0(4)   |
| C(4)-C(5)-C(6)-C(7)   | -162.6(3) |
| C(5)-C(6)-C(7)-C(8)   | -55.0(4)  |
| C(6)-C(7)-C(8)-C(15)  | -81.0(4)  |
| C(6)-C(7)-C(8)-C(9)   | 45.6(4)   |
| C(6)-C(7)-C(8)-C(14)  | 166.5(3)  |
| C(7)-C(8)-C(9)-C(11)  | -176.9(3) |
| C(15)-C(8)-C(9)-C(11) | -48.6(4)  |
| C(14)-C(8)-C(9)-C(11) | 60.8(3)   |
| C(7)-C(8)-C(9)-C(10)  | -45.5(4)  |
| C(15)-C(8)-C(9)-C(10) | 82.7(3)   |
| C(14)-C(8)-C(9)-C(10) | -167.9(3) |
| C(2)-C(1)-C(10)-C(5)  | -53.3(4)  |
| C(2)-C(1)-C(10)-C(18) | 70.3(4)   |
| C(2)-C(1)-C(10)-C(9)  | -168.2(3) |
| C(6)-C(5)-C(10)-C(1)  | -175.1(3) |
| C(4)-C(5)-C(10)-C(1)  | 51.6(3)   |
| C(6)-C(5)-C(10)-C(18) | 64.1(3)   |
| C(4)-C(5)-C(10)-C(18) | -69.2(3)  |
| C(6)-C(5)-C(10)-C(9)  | -60.2(3)  |
| C(4)-C(5)-C(10)-C(9)  | 166.5(2)  |
| C(8)-C(9)-C(10)-C(1)  | 168.3(3)  |
| C(11)-C(9)-C(10)-C(1) | -63.0(3)  |
| C(8)-C(9)-C(10)-C(5)  | 52.4(3)   |
| C(11)-C(9)-C(10)-C(5) | -178.9(3) |

|                         |           |
|-------------------------|-----------|
| C(8)-C(9)-C(10)-C(18)   | -72.4(3)  |
| C(11)-C(9)-C(10)-C(18)  | 56.3(4)   |
| C(8)-C(9)-C(11)-C(12)   | -10.1(4)  |
| C(10)-C(9)-C(11)-C(12)  | -142.2(3) |
| C(15)-N(1)-C(12)-C(13)  | 97.0(3)   |
| C(15)-N(1)-C(12)-C(11)  | -17.0(5)  |
| C(13)-N(1)-C(12)-C(11)  | -114.0(4) |
| C(9)-C(11)-C(12)-C(13)  | -26.9(5)  |
| C(9)-C(11)-C(12)-N(1)   | 44.1(4)   |
| N(1)-C(12)-C(13)-C(14)  | -92.9(3)  |
| C(11)-C(12)-C(13)-C(14) | 11.8(5)   |
| C(11)-C(12)-C(13)-N(1)  | 104.7(4)  |
| N(1)-C(12)-C(13)-C(19)  | 106.7(4)  |
| C(11)-C(12)-C(13)-C(19) | -148.7(3) |
| C(15)-N(1)-C(13)-C(12)  | -110.0(3) |
| C(15)-N(1)-C(13)-C(14)  | 1.6(4)    |
| C(12)-N(1)-C(13)-C(14)  | 111.6(3)  |
| C(15)-N(1)-C(13)-C(19)  | 137.9(4)  |
| C(12)-N(1)-C(13)-C(19)  | -112.1(4) |
| C(12)-C(13)-C(14)-C(8)  | 37.3(4)   |
| N(1)-C(13)-C(14)-C(8)   | -26.7(4)  |
| C(19)-C(13)-C(14)-C(8)  | -161.9(3) |
| C(7)-C(8)-C(14)-C(13)   | 161.8(3)  |
| C(15)-C(8)-C(14)-C(13)  | 41.0(3)   |
| C(9)-C(8)-C(14)-C(13)   | -75.3(3)  |
| C(12)-N(1)-C(15)-C(8)   | -39.2(4)  |
| C(13)-N(1)-C(15)-C(8)   | 24.3(4)   |
| C(7)-C(8)-C(15)-N(1)    | -158.0(3) |
| C(9)-C(8)-C(15)-N(1)    | 74.9(3)   |
| C(14)-C(8)-C(15)-N(1)   | -39.4(3)  |
| O(1)-C(20)-C(21)-C(22)  | 170.2(4)  |
| C(25)-C(20)-C(21)-C(22) | -4.9(6)   |
| O(1)-C(20)-C(21)-N(2)   | -9.8(7)   |
| C(25)-C(20)-C(21)-N(2)  | 175.0(4)  |
| O(3)-N(2)-C(21)-C(22)   | 157.4(5)  |
| O(2)-N(2)-C(21)-C(22)   | -21.3(6)  |
| O(3)-N(2)-C(21)-C(20)   | -22.5(7)  |
| O(2)-N(2)-C(21)-C(20)   | 158.7(4)  |

|                         |           |
|-------------------------|-----------|
| C(20)-C(21)-C(22)-C(23) | 1.8(6)    |
| N(2)-C(21)-C(22)-C(23)  | -178.2(4) |
| C(21)-C(22)-C(23)-C(24) | 0.9(6)    |
| C(21)-C(22)-C(23)-N(4)  | 178.2(4)  |
| O(7)-N(4)-C(23)-C(24)   | -179.5(4) |
| O(6)-N(4)-C(23)-C(24)   | 0.2(6)    |
| O(7)-N(4)-C(23)-C(22)   | 3.3(6)    |
| O(6)-N(4)-C(23)-C(22)   | -177.1(4) |
| C(22)-C(23)-C(24)-C(25) | 0.1(6)    |
| N(4)-C(23)-C(24)-C(25)  | -177.2(4) |
| C(23)-C(24)-C(25)-C(20) | -3.9(7)   |
| C(23)-C(24)-C(25)-N(3)  | 177.9(4)  |
| O(1)-C(20)-C(25)-C(24)  | -169.5(4) |
| C(21)-C(20)-C(25)-C(24) | 6.0(6)    |
| O(1)-C(20)-C(25)-N(3)   | 8.7(6)    |
| C(21)-C(20)-C(25)-N(3)  | -175.8(4) |
| O(4)-N(3)-C(25)-C(24)   | 42.7(7)   |
| O(5)-N(3)-C(25)-C(24)   | -136.0(4) |
| O(4)-N(3)-C(25)-C(20)   | -135.6(5) |
| O(5)-N(3)-C(25)-C(20)   | 45.7(6)   |

---

Symmetry transformations used to generate equivalent atoms:

Table 7. Hydrogen bonds for g61eam [ $\text{\AA}$  and  $^\circ$ ].

| D-H...A          | d(D-H)  | d(H...A) | d(D...A) | $\angle$ (DHA) |
|------------------|---------|----------|----------|----------------|
| N(1)-H(1)...O(1) | 0.87(4) | 1.78(4)  | 2.646(4) | 177(4)         |

Symmetry transformations used to generate equivalent atoms:
